# Supplementary material for: Juvenile Hormone-Receptor Complex Acts on Mcm4 and Mcm7 to Promote Polyploidy and Vitellogenesis in the Migratory Locust
Source: PLoS Genet. 2014 Oct 23;10(10):e1004702. doi: 10.1371/journal.pgen.1004702 (PMC4207617; doi:10.1371/journal.pgen.1004702)
Supplement: Table S1 — The list of up- and down-regulated genes in JH-deprived fat bodies further treated with methoprene for 24 h in RNA-seq analysis. (XLSX) [file pgen.1004702.s009.xlsx]

## Sheet: UP
GeneID	P1_RPKM-adj	P2_RPKM-adj	P3_RPKM-adj	PM24-1_RPKM-adj	PM24-2_RPKM-adj	PM24-3_RPKM-adj	Pval	FC	Description	GO Component	GO Function	GO Process	Blast nr
MergeConsencus72301	0	61.9936	71.2267	71918.3	47273.4	44715	0.00162755	1230.34	Swissprot: Q16927 1e-28 VIT1_AEDAE Vitellogenin-A1 OS=Aedes aegypti GN=VGA1 PE=1 SV=2|Nr: ref|XP_001843136.1| 8e-32 vitellogenin-A1 [Culex quinquefasciatus] gb|EDS30760.1| vitellogenin-A1 [Culex quinquefasciatus]|IPR: IPR001747; Lipid transport protein, N-terminal|GO: GO:0005319; lipid transporter activity; Molecular Function				gi|296258181|gb|ADH04227.1|/2.17386e32/vitellogenin 2b [Culex tarsalis]
MergeConsencus71617	0.296872	47.8206	43.1432	47113.4	31258.9	26991.5	0.00229293	1154.54	Swissprot: Q9BPS0 5e-13 VIT2_PERAM Vitellogenin-2 OS=Periplaneta americana GN=VG2 PE=2 SV=1|Nr: dbj|BAF75351.1| 1e-23 vitellogenin [Nilaparvata lugens]				gi|154799937|dbj|BAF75351.1|/6.36638e24/vitellogenin [Nilaparvata lugens]
MergeConsencus72588	0	31.7179	36.7407	35870.3	20984.7	21274.9	0.00305402	1141.27	Swissprot: Q05808 3e-06 VIT_ANTGR Vitellogenin OS=Anthonomus grandis GN=VTG PE=4 SV=1|Nr: gb|AAZ06771.1| 2e-12 vitellogenin [Homalodisca coagulata]|IPR: IPR001747; Lipid transport protein, N-terminal				gi|70673205|gb|AAZ06771.1|/8.41986e13/vitellogenin [Homalodisca vitripennis]
MergeConsencus71000	0	52.7729	68.732	61008.3	37532.1	35897.3	0.00263026	1106.44	Swissprot: Q16927 3e-45 VIT1_AEDAE Vitellogenin-A1 OS=Aedes aegypti GN=VGA1 PE=1 SV=2|Nr: gb|EEB18660.1| 2e-47 predicted protein [Pediculus humanus corporis]|IPR: IPR001747; Lipid transport protein, N-terminal|GO: GO:0005319; lipid transporter activity; Molecular Function				gi|242021935|ref|XP_002431398.1|/8.93294e48/predicted protein [Pediculus humanus corporis]
MergeConsencus71031	1.05828	100.166	94.0771	81470.4	58105.9	53348.4	0.000892809	987.83	Nr: dbj|BAF75351.1| 1e-08 vitellogenin [Nilaparvata lugens]				gi|154799937|dbj|BAF75351.1|/4.31903e09/vitellogenin [Nilaparvata lugens]
MergeConsencus71381	0	69.926	69.1912	57568.2	39232.2	36692.5	0.00124928	959.572	Swissprot: Q9U8M0 7e-06 VIT1_PERAM Vitellogenin-1 OS=Periplaneta americana GN=VG2 PE=2 SV=1|Nr: dbj|BAA85987.1| 2e-06 vitellogenin [Graptopsaltria nigrofuscata]
MergeConsencus71987	1.43837	30.8644	20.5696	17077.7	16383.3	12571.8	0.000198093	870.64	Swissprot: Q8TFG9 1e-07 YL61_SCHPO Uncharacterized serine/threonine-rich protein PB15E9.01c OS=Schizosaccharomyces pombe GN=SPAPB15E9.01c PE=2 SV=2|Nr: ref|XP_001713096.1| 2e-06 sequence orphan [Schizosaccharomyces pombe] emb|CAD27472.2| sequence orphan [Schizosaccharomyces pombe]
MergeConsencus13999	0	0.153942	0.506045	159.323	128.439	171.123	0.000138139	695.294	Nr: ref|XP_970846.1| 1e-141 PREDICTED: similar to ZK899.2 [Tribolium castaneum]			GO:0007275//multicellular organismal development;GO:0009987//cellular process;GO:0040007//growth	gi|91079538|ref|XP_970846.1|/9.86968e136/PREDICTED: similar to ZK899.2 [Tribolium castaneum]
MergeConsencus40432	0	0.311479	0	21.3413	11.0269	29.3273	0.00905829	198.073	Swissprot: A4Z944 6e-12 ZBED5_CANFA Zinc finger BED domain-containing protein 5 OS=Canis familiaris GN=ZBED5 PE=4 SV=1|Nr: ref|XP_001950797.1| 4e-13 PREDICTED: similar to transposase-like protein [Acyrthosiphon pisum]		GO:0003676//nucleic acid binding		gi|193629749|ref|XP_001950797.1|/3.21947e13/PREDICTED: similar to transposaselike protein [Acyrthosiphon pisum]
Contig1921	4.0908	8.58906	2.03287	796.214	871.11	652.904	0.000138227	157.702	Swissprot: P14296 2e-43 ARYA_MANSE Arylphorin subunit alpha OS=Manduca sexta PE=2 SV=1|Nr: gb|AAX14951.1| 1e-108 arylphorin hexamerin-like protein 2 [Romalea microptera]|Nt: gb|AY923852.1| 1e-123 Romalea microptera arylphorin hexamerin-like protein 2 mRNA, complete cds|Kegg: dme:Dmel_CG6806 3e-27 Lsp2; Larval serum protein 2 [EC:3.4.17.1]; K01290 carboxypeptidase A
MergeConsencus28668	0.079258	0.279569	0	6.27297	15.6037	4.92434	0.0292688	74.6906	Swissprot: Q9H172 2e-70 ABCG4_HUMAN ATP-binding cassette sub-family G member 4 OS=Homo sapiens GN=ABCG4 PE=2 SV=2|Nr: ref|XP_001811847.1| 4e-98 PREDICTED: similar to CG4822 CG4822-PA [Tribolium castaneum]|IPR: IPR003439; ABC transporter-like		GO:0017111//nucleosidetriphosphatase activity		gi|270006257|gb|EFA02705.1|/1.57071e98/hypothetical protein TcasGA2_TC008427 [Tribolium castaneum]
MergeConsencus23926	0	0.539663	0.3548	20.1095	21.6867	10.3698	0.00424736	58.3211	Nr: ref|XP_970937.1| 1e-06 PREDICTED: similar to ctl transporter [Tribolium castaneum]|IPR: IPR006612; Zinc finger, C2CH-type|GO: GO:0003676; nucleic acid binding; Molecular Function				gi|270015676|gb|EFA12124.1|/5.28281e07/hypothetical protein TcasGA2_TC002270 [Tribolium castaneum]
MergeConsencus17638	0	0.212522	0	6.64194	2.4401	3.06276	0.019323	57.146	Nr: ref|XP_001602018.1| 2e-17 PREDICTED: similar to secretory Phospholipase A2, putative [Nasonia vitripennis]		GO:0046872//metal ion binding;GO:0004091//carboxylesterase activity	GO:0019637//organophosphate metabolic process;GO:0006629//lipid metabolic process	gi|156553155|ref|XP_001602018.1|/4.5088e18/PREDICTED: similar to secretory Phospholipase A2, putative [Nasonia vitripennis]
Contig5413	53.0793	18.765	6.51505	2041.21	1558.6	703.73	0.0113863	54.9206	Swissprot: Q17127 3e-65 HEXA_BLADI Hexamerin OS=Blaberus discoidalis PE=2 SV=1|Nr: gb|AAX14951.1| 1e-156 arylphorin hexamerin-like protein 2 [Romalea microptera]|Nt: gb|AY923852.1| 1e-135 Romalea microptera arylphorin hexamerin-like protein 2 mRNA, complete cds|Cog: DR2133 7e-07 --|Kegg: dme:Dmel_CG6806 9e-50 Lsp2; Larval serum protein 2 [EC:3.4.17.1]; K01290 carboxypeptidase A
MergeConsencus39052	0.966334	1.85923	0.135816	56.2438	32.0204	72.8406	0.00565052	54.402	Swissprot: Q49AG3 4e-08 ZBED5_HUMAN Zinc finger BED domain-containing protein 5 OS=Homo sapiens GN=ZBED5 PE=2 SV=2|Nr: ref|XP_001950797.1| 4e-12 PREDICTED: similar to transposase-like protein [Acyrthosiphon pisum]				gi|193629749|ref|XP_001950797.1|/7.38205e11/PREDICTED: similar to transposaselike protein [Acyrthosiphon pisum]
MergeConsencus55080	0.208629	1.47181	0.161273	24.4734	22.0622	46.1927	0.00846539	50.3491	Swissprot: P29981 8e-52 CP4C1_BLADI Cytochrome P450 4C1 OS=Blaberus discoidalis GN=CYP4C1 PE=2 SV=1|Nr: emb|CAQ57674.1| 3e-52 cytochrome P450 [Nilaparvata lugens]|IPR: IPR001128; Cytochrome P450	GO:0044464//cell part	GO:0046872//metal ion binding;GO:0016491//oxidoreductase activity		gi|189178724|emb|CAQ57674.1|/1.20286e52/cytochrome P450 [Nilaparvata lugens]
MergeConsencus779	0.167967	0	0	2.8487	2.07856	2.84615	0.000320728	46.2794	Swissprot: P08155 1e-75 KRUH_DROME Krueppel homologous protein 1 OS=Drosophila melanogaster GN=Kr-h1 PE=2 SV=2|Nr: ref|NP_001011566.1| 1e-119 kruppel-like protein 1 [Apis mellifera] gb|AAR08420.1| Kruppel-like protein 1 [Apis mellifera]|Cog: SPAC144.09c 2e-21 --|Kegg: hsa:7770 8e-66 ZNF227; zinc finger protein 227; K09228 KRAB domain-containing zinc finger protein		GO:0005488//binding	GO:0032502//developmental process	gi|58585074|ref|NP_001011566.1|/3.49696e119/kruppellike protein 1 [Apis mellifera]
MergeConsencus23577	0.0986228	0.695751	0	13.6598	10.2073	8.46708	0.00120771	40.7041	Swissprot: Q9Y117 1e-136 GALT3_DROME Polypeptide N-acetylgalactosaminyltransferase 3 OS=Drosophila melanogaster GN=pgant3 PE=1 SV=1|Nr: ref|XP_001946977.1| 0.0 PREDICTED: similar to AGAP008229-PA [Acyrthosiphon pisum]|IPR: IPR001173; Glycosyl transferase, family 2|Cog: DR2133 1e-09 --|Kegg: dme:Dmel_CG4445 1e-135 pgant3; polypeptide GalNAc transferase 3 [EC:2.4.1.41]; K00710 polypeptide N-acetylg…	GO:0044431//Golgi apparatus part	GO:0008376//acetylgalactosaminyltransferase activity	GO:0006493//protein amino acid Olinked glycosylation;GO:0030155//regulation of cell adhesion;GO:0009311//oligosaccharide metabolic process	gi|193697563|ref|XP_001946977.1|/1.29941e149/PREDICTED: similar to AGAP008229PA [Acyrthosiphon pisum]
MergeConsencus1908	4.11349	13.9226	0.882249	263.801	138.026	334.005	0.00707934	38.8953	Swissprot: A4Z943 7e-31 ZBED5_BOVIN Zinc finger BED domain-containing protein 5 OS=Bos taurus GN=ZBED5 PE=4 SV=1|Nr: ref|XP_001950797.1| 1e-35 PREDICTED: similar to transposase-like protein [Acyrthosiphon pisum]|IPR: IPR002156; Ribonuclease H				gi|193629749|ref|XP_001950797.1|/4.0984e36/PREDICTED: similar to transposaselike protein [Acyrthosiphon pisum]
MergeConsencus28901	0.831967	0.244552	0	12.3463	21.9948	2.81949	0.0478654	34.5193	Swissprot: P36514 3e-16 UD2C1_RABIT UDP-glucuronosyltransferase 2C1 (Fragment) OS=Oryctolagus cuniculus GN=UGT2C1 PE=2 SV=1|Nr: ref|XP_001811749.1| 3e-60 PREDICTED: similar to AGAP007920-PA [Tribolium castaneum]|Cog: DR2133 1e-06 --|Kegg: dme:Dmel_CG18578 3e-41 Ugt86Da; Ugt86Da [EC:2.4.1.17]; K04628 UDP-galactose ceramide galactosyltransferase				gi|189236198|ref|XP_001811749.1|/3.14372e61/PREDICTED: similar to AGAP007920PA [Tribolium castaneum]
MergeConsencus50334	0.324977	0.3821	0.251211	17.9126	6.58069	8.25995	0.0199425	34.1789	Swissprot: Q17127 1e-13 HEXA_BLADI Hexamerin OS=Blaberus discoidalis PE=2 SV=1|Nr: gb|AAX14951.1| 3e-24 arylphorin hexamerin-like protein 2 [Romalea microptera]|IPR: IPR005203; Hemocyanin, C-terminal				gi|60256959|gb|AAX14951.1|/1.17506e24/arylphorin hexamerinlike protein 2 [Romalea microptera]
MergeConsencus1986	0.488242	0.956773	0.251611	18.0562	21.9706	12.042	0.00219708	30.6896	Swissprot: P35779 3e-27 VA3_SOLRI Venom allergen 3 OS=Solenopsis richteri PE=1 SV=2|Nr: ref|XP_001605587.1| 2e-64 PREDICTED: similar to GA21107-PA [Nasonia vitripennis]|IPR: IPR002345; Lipocalin|GO: GO:0005215; transporter activity; Molecular Function				gi|156545768|ref|XP_001605587.1|/2.6662e59/PREDICTED: similar to GA21107PA [Nasonia vitripennis]
MergeConsencus5035	3.88867	9.7976	2.14713	169.328	132.074	147.892	9.84067e-05	28.3763	Nr: ref|XP_975207.2| 2e-10 PREDICTED: similar to AGAP008229-PA [Tribolium castaneum]|IPR: IPR000772; Ricin B lectin				gi|270011650|gb|EFA08098.1|/1.15577e09/hypothetical protein TcasGA2_TC005702 [Tribolium castaneum]
Contig5384	22.759	6.63272	215.928	2510.32	2162.08	2082.92	6.21038e-05	27.5368	Swissprot: Q17127 1e-53 HEXA_BLADI Hexamerin OS=Blaberus discoidalis PE=2 SV=1|Nr: gb|AAX14951.1| 1e-135 arylphorin hexamerin-like protein 2 [Romalea microptera]|Nt: gb|AY923852.1| 1e-115 Romalea microptera arylphorin hexamerin-like protein 2 mRNA, complete cds|Cog: DR2133 2e-07 --|Kegg: dme:Dmel_CG6806 1e-37 Lsp2; Larval serum protein 2 [EC:3.4.17.1]; K01290 carboxypeptidase A
MergeConsencus16724	0.116513	0.136994	0	3.12875	2.62152	0.658095	0.0265246	25.2788	Swissprot: Q6TCH7 1e-62 PAQR3_HUMAN Progestin and adipoQ receptor family member 3 OS=Homo sapiens GN=PAQR3 PE=2 SV=2|Nr: ref|XP_392336.3| 1e-128 PREDICTED: similar to CG7530-PA, isoform A [Apis mellifera]|IPR: IPR004254; Hly-III related proteins|GO: GO:0016021; integral to membrane; Cellular Component|Cog: SPBC12C2.09c 7e-27 --|Kegg: tbr:Tb10.6k15.1100 3e-32 adiponectin receptor protein 1; K07297…	GO:0031224//intrinsic to membrane	GO:0004871//signal transducer activity		gi|110755949|ref|XP_392336.3|/6.04111e129/PREDICTED: similar to CG7530PA, isoform A [Apis mellifera]
MergeConsencus8792	0.874991	1.76365	0.579752	26.2346	37.6866	5.93058	0.0375691	21.7039	Swissprot: P36513 3e-42 UDB14_RABIT UDP-glucuronosyltransferase 2B14 OS=Oryctolagus cuniculus GN=UGT2B14 PE=2 SV=1|Nr: ref|XP_001811749.1| 4e-78 PREDICTED: similar to AGAP007920-PA [Tribolium castaneum]|IPR: IPR002213; UDP-glucuronosyl/UDP-glucosyltransferase|GO: GO:0008152; metabolic process; Biological Process				gi|189236198|ref|XP_001811749.1|/2.99782e73/PREDICTED: similar to AGAP007920PA [Tribolium castaneum]
MergeConsencus27926	0.294164	1.21055	0.644277	16.0064	17.429	11.8521	0.000528281	21.0738	Swissprot: P48038 6e-06 ACRO_RABIT Acrosin OS=Oryctolagus cuniculus GN=ACR PE=2 SV=1|Nr: ref|NP_001129235.1| 9e-08 Kruppel-homolog 1 [Tribolium castaneum] dbj|BAG71979.1| Kruppel-homolog 1 [Tribolium castaneum]|Kegg: uma:UM03687.1 1e-06 hypothetical protein; K05747 Wiskott-Aldrich syndrome protein
Contig5025	13.6034	98.5172	28.0415	1168.89	1380.65	300.882	0.0263223	20.3366	Swissprot: Q17127 2e-55 HEXA_BLADI Hexamerin OS=Blaberus discoidalis PE=2 SV=1|Nr: gb|AAX14951.1| 1e-129 arylphorin hexamerin-like protein 2 [Romalea microptera]|Nt: gb|AY923852.1| 1e-118 Romalea microptera arylphorin hexamerin-like protein 2 mRNA, complete cds|Cog: DR2133 8e-07 --|Kegg: dme:Dmel_CG6806 3e-40 Lsp2; Larval serum protein 2 [EC:3.4.17.1]; K01290 carboxypeptidase A
MergeConsencus9533	32.403	14.1265	1.12575	559.328	197.009	208.519	0.0311908	20.2466	Nr: gb|AAX14951.1| 5e-08 arylphorin hexamerin-like protein 2 [Romalea microptera]
MergeConsencus54063	0.128296	0.301696	0.0991746	5.43974	3.89695	0.869578	0.0371594	19.2874	Swissprot: O86938 1e-21 PPD_STRVR Phosphonopyruvate decarboxylase OS=Streptomyces viridochromogenes GN=ppd PE=3 SV=1|Nr: ref|XP_001631700.1| 8e-49 predicted protein [Nematostella vectensis] gb|EDO39637.1| predicted protein [Nematostella vectensis]|IPR: IPR000399; TPP-binding enzymes, conserved site		GO:0003824//catalytic activity;GO:0005488//binding		gi|221131535|ref|XP_002161224.1|/3.79034e50/PREDICTED: similar to predicted protein [Hydra magnipapillata]
Contig4570	96.653	103.279	3.99414	1774.97	953.638	1046.52	0.0052108	18.5122	Swissprot: P14296 2e-38 ARYA_MANSE Arylphorin subunit alpha OS=Manduca sexta PE=2 SV=1|Nr: gb|AAX14951.1| 1e-103 arylphorin hexamerin-like protein 2 [Romalea microptera]|Nt: gb|AY923852.1| 1e-126 Romalea microptera arylphorin hexamerin-like protein 2 mRNA, complete cds|Kegg: dme:Dmel_CG6806 4e-24 Lsp2; Larval serum protein 2 [EC:3.4.17.1]; K01290 carboxypeptidase A
MergeConsencus4017	1.86678	3.22782	0.33954	32.2812	50.6495	15.3819	0.0193919	18.0916	Swissprot: O86938 6e-47 PPD_STRVR Phosphonopyruvate decarboxylase OS=Streptomyces viridochromogenes GN=ppd PE=3 SV=1|Nr: ref|XP_001631700.1| 1e-140 predicted protein [Nematostella vectensis] gb|EDO39637.1| predicted protein [Nematostella vectensis]|IPR: IPR000399; TPP-binding enzymes, conserved site		GO:0046872//metal ion binding;GO:0003824//catalytic activity		gi|156379913|ref|XP_001631700.1|/7.41624e141/predicted protein [Nematostella vectensis]
MergeConsencus40999	0.744524	1.16719	0.095921	7.01504	6.00265	16.1201	0.024456	14.5135	Swissprot: Q54KX0 6e-09 GTAN_DICDI GATA zinc finger domain-containing protein 14 OS=Dictyostelium discoideum GN=gtaN PE=4 SV=1|Nr: ref|XP_637464.1| 2e-08 hypothetical protein [Dictyostelium discoideum AX4] gb|EAL63958.1| hypothetical protein DDBDRAFT_0187191 [Dictyostelium discoideum AX4]|Kegg: ddi:DDBDRAFT_0190674 4e-08 hypothetical protein [EC:3.1.11.-]; K01146
MergeConsencus16920	2.95061	2.82681	5.15304	67.6495	38.7263	52.0959	0.00211535	14.4982	Swissprot: Q24388 1e-06 LSP2_DROME Larval serum protein 2 OS=Drosophila melanogaster GN=Lsp2 PE=1 SV=2|Nr: gb|AAX14951.1| 1e-21 arylphorin hexamerin-like protein 2 [Romalea microptera]|Kegg: dme:Dmel_CG6806 2e-06 Lsp2; Larval serum protein 2 [EC:3.4.17.1]; K01290 carboxypeptidase A				gi|60256959|gb|AAX14951.1|/5.35069e22/arylphorin hexamerinlike protein 2 [Romalea microptera]
MergeConsencus11615	0.547715	0.409812	0.19245	5.34832	7.89819	2.13741	0.0234013	13.3776	Swissprot: Q6TCG8 1e-39 PAQR3_MOUSE Progestin and adipoQ receptor family member 3 OS=Mus musculus GN=Paqr3 PE=2 SV=1|Nr: gb|EEB19387.1| 6e-89 conserved hypothetical protein [Pediculus humanus corporis]|IPR: IPR004254; Hly-III related proteins|GO: GO:0016021; integral to membrane; Cellular Component|Cog: SPBC12C2.09c 1e-15 --|Kegg: xla:380413 2e-16 adipor1; adiponectin receptor 1; K07297 adiponect…	GO:0031224//intrinsic to membrane			gi|242023406|ref|XP_002432125.1|/2.28025e82/conserved hypothetical protein [Pediculus humanus corporis]
MergeConsencus13332	2.31115	0	0.223318	8.57432	15.2751	8.81139	0.00613898	12.8866	Swissprot: Q4V8T0 2e-09 MIOX_DANRE Inositol oxygenase OS=Danio rerio GN=miox PE=2 SV=1|Nr: ref|XP_392190.2| 2e-09 PREDICTED: similar to CG6910-PA [Apis mellifera]|Kegg: dre:571850 4e-09 zgc:114168; zgc:114168 [EC:1.13.99.1]; K00469 inositol oxygenase				gi|66503826|ref|XP_392190.2|/7.13344e10/PREDICTED: similar to CG6910PA [Apis mellifera]
MergeConsencus7718	118.511	15.4825	7.46452	673.698	694.595	443.275	0.00160418	12.8064	Swissprot: Q4V8T0 1e-53 MIOX_DANRE Inositol oxygenase OS=Danio rerio GN=miox PE=2 SV=1|Nr: gb|EEB19265.1| 1e-56 Inositol oxygenase, putative [Pediculus humanus corporis]|Kegg: dre:571850 2e-53 zgc:114168; zgc:114168 [EC:1.13.99.1]; K00469 inositol oxygenase
MergeConsencus49921	59.3386	11.6991	14.544	303.243	419.254	349.668	0.000446078	12.528	Swissprot: Q4V8T0 7e-37 MIOX_DANRE Inositol oxygenase OS=Danio rerio GN=miox PE=2 SV=1|Nr: ref|XP_392190.2| 3e-37 PREDICTED: similar to CG6910-PA [Apis mellifera]|Kegg: dre:571850 2e-36 zgc:114168; zgc:114168 [EC:1.13.99.1]; K00469 inositol oxygenase	GO:0044424//intracellular part	GO:0046914//transition metal ion binding;GO:0016701//oxidoreductase activity, acting on single donors with incorporation of molecular oxygen	GO:0006020//inositol metabolic process	gi|66503826|ref|XP_392190.2|/1.35991e37/PREDICTED: similar to CG6910PA [Apis mellifera]
MergeConsencus7526	387.792	53.3667	3.0777	1837.8	2048.27	1425.75	0.000886771	11.9572	Swissprot: Q8WN98 2e-37 MIOX_PIG Inositol oxygenase OS=Sus scrofa GN=MIOX PE=1 SV=1|Nr: ref|NP_001093275.1| 7e-58 myo-inositol oxygenase [Bombyx mori] gb|ABF51424.1| myo-inositol oxygenase [Bombyx mori]|IPR: IPR007828; Protein of unknown function DUF706|Kegg: spu:593425 2e-38 LOC593425; similar to myo-inositol oxygenase [EC:1.13.99.1]; K00469 inositol oxygenase	GO:0044424//intracellular part	GO:0046914//transition metal ion binding;GO:0016701//oxidoreductase activity, acting on single donors with incorporation of molecular oxygen	GO:0006020//inositol metabolic process	gi|153791757|ref|NP_001093275.1|/9.69324e58/myoinositol oxygenase [Bombyx mori]
Contig5137	356.5	378.239	28.1438	4480.93	2408.26	2207.41	0.00974192	11.924	Swissprot: Q17127 1e-129 HEXA_BLADI Hexamerin OS=Blaberus discoidalis PE=2 SV=1|Nr: gb|AAX14951.1| 0.0 arylphorin hexamerin-like protein 2 [Romalea microptera]|Nt: gb|AY923852.1| 0.0 Romalea microptera arylphorin hexamerin-like protein 2 mRNA, complete cds|Cog: YGL028c 1e-07 --|Kegg: dme:Dmel_CG6806 2e-95 Lsp2; Larval serum protein 2 [EC:3.4.17.1]; K01290 carboxypeptidase A
MergeConsencus23375	0	0.185301	1.58373	9.35501	6.91455	4.45077	0.00680692	11.7128	Swissprot: Q9JII6 2e-60 AK1A1_MOUSE Alcohol dehydrogenase [NADP+] OS=Mus musculus GN=Akr1a1 PE=1 SV=3|Nr: ref|XP_966351.1| 5e-80 PREDICTED: similar to aldo-keto reductase isoform 1 [Tribolium castaneum]|IPR: IPR001395; Aldo/keto reductase|GO: GO:0016491; oxidoreductase activity; Molecular Function|Cog: slr0942 6e-49 --|Kegg: spu:589385 6e-61 LOC589385; hypothetical LOC589385 [EC:1.1.1.21]; K00011…				gi|91094089|ref|XP_966351.1|/4.84419e76/PREDICTED: similar to aldoketo reductase isoform 1 [Tribolium castaneum]
MergeConsencus25481	2.57239	0	0	7.99838	12.7332	7.55532	0.00503779	10.9963	Swissprot: O14370 6e-21 BCA1_SCHPO Branched-chain-amino-acid aminotransferase, mitochondrial OS=Schizosaccharomyces pombe GN=eca39 PE=2 SV=2|Nr: ref|XP_973618.1| 6e-22 PREDICTED: similar to CG1673 CG1673-PA [Tribolium castaneum]|IPR: IPR001544; Aminotransferase, class IV|GO: GO:0003824; catalytic activity; Molecular Function	GO:0043231//intracellular membranebounded organelle	GO:0008483//transaminase activity	GO:0008652//cellular amino acid biosynthetic process	gi|91077610|ref|XP_973618.1|/2.03939e22/PREDICTED: similar to CG1673 CG1673PA [Tribolium castaneum]
MergeConsencus5008	12.269	14.7803	5.32505	159.542	89.8852	102.186	0.00397858	10.8609	Swissprot: Q61009 7e-55 SCRB1_MOUSE Scavenger receptor class B member 1 OS=Mus musculus GN=Scarb1 PE=2 SV=1|Nr: ref|XP_001950032.1| 1e-142 PREDICTED: similar to antigen CD36, putative [Acyrthosiphon pisum]|IPR: IPR002159; CD36 antigen|GO: GO:0007155; cell adhesion; Biological Process				gi|193603597|ref|XP_001950032.1|/3.54384e136/PREDICTED: similar to antigen CD36, putative [Acyrthosiphon pisum]
MergeConsencus54160	0.189206	0.333696	0	2.27298	1.48998	1.81676	0.0012011	10.6707	Swissprot: Q7Q0Q1 0.0 MCM6_ANOGA DNA replication licensing factor Mcm6 OS=Anopheles gambiae GN=Mcm6 PE=3 SV=3|Nr: ref|XP_969603.1| 0.0 PREDICTED: similar to AGAP010219-PA [Tribolium castaneum]|IPR: IPR001208; MCM	GO:0043231//intracellular membranebounded organelle;GO:0032993//proteinDNA complex	GO:0003678//DNA helicase activity;GO:0043169//cation binding;GO:0003676//nucleic acid binding;GO:0032559//adenyl ribonucleotide binding	GO:0010468//regulation of gene expression;GO:0006261//DNAdependent DNA replication;GO:0000087//M phase of mitotic cell cycle;GO:0006277//DNA amplification	gi|91091516|ref|XP_969603.1|/0/PREDICTED: similar to AGAP010219PA [Tribolium castaneum]
MergeConsencus17796	9.39971	13.815	5.14681	84.4142	123.149	87.8226	0.00106969	10.415	Nr: ref|XP_001145737.1| 1e-05 PREDICTED: hypothetical protein [Pan troglodytes]
MergeConsencus2367	0.936917	0.122401	0	5.4438	2.34226	2.58716	0.0201529	9.79237	Swissprot: O89033 1e-53 CDC6_MOUSE Cell division control protein 6 homolog OS=Mus musculus GN=Cdc6 PE=2 SV=2|Nr: ref|XP_001813224.1| 3e-74 PREDICTED: similar to Cdc6 [Tribolium castaneum]|Cog: SPBC14C8.07c 2e-28 --|Kegg: dpo:Dpse_GA19269 1e-74 GA19269-PA; K02213 cell division control protein CDC6				gi|125978150|ref|XP_001353108.1|/2.80752e67/GA19269 [Drosophila pseudoobscura pseudoobscura]
MergeConsencus41391	0.339847	0.799168	0	2.88188	2.42138	5.50266	0.0154778	9.48708	Swissprot: Q6UWM9 3e-12 UD2A3_HUMAN UDP-glucuronosyltransferase 2A3 OS=Homo sapiens GN=UGT2A3 PE=2 SV=1|Nr: ref|XP_002073194.1| 4e-18 GK13278 [Drosophila willistoni] gb|EDW84180.1| GK13278 [Drosophila willistoni]|IPR: IPR002213; UDP-glucuronosyl/UDP-glucosyltransferase|GO: GO:0008152; metabolic process; Biological Process		GO:0016740//transferase activity		gi|195452058|ref|XP_002073194.1|/1.06901e17/GK13278 [Drosophila willistoni]
MergeConsencus20368	0.302653	0.254181	0.133688	2.6887	1.99424	1.66062	0.00178481	9.18661	Swissprot: P45844 0.0 ABCG1_HUMAN ATP-binding cassette sub-family G member 1 OS=Homo sapiens GN=ABCG1 PE=2 SV=3|Nr: ref|XP_001602329.1| 0.0 PREDICTED: similar to putative white family ATP-binding cassette transporter [Nasonia vitripennis]|IPR: IPR003439; ABC transporter-like	GO:0016021//integral to membrane;GO:0009986//cell surface;GO:0005768//endosome	GO:0017111//nucleosidetriphosphatase activity;GO:0008565//protein transporter activity;GO:0032934//sterol binding;GO:0015248//sterol transporter activity;GO:0046983//protein dimerization activity;GO:0042802//identical protein binding;GO:0032559//adenyl ri	GO:0010893//positive regulation of steroid biosynthetic process;GO:0010878//cholesterol storage;GO:0016125//sterol metabolic process;GO:0010742//macrophage derived foam cell differentiation;GO:0034369//plasma lipoprotein particle remodeling;GO:0006516//gl	gi|110756248|ref|XP_623409.2|/0/PREDICTED: similar to ATPbinding cassette subfamily G member 4 [Apis mellifera]
Contig5529	146.39	237.043	85.8012	2227.58	814.303	1221.13	0.0200834	9.08504	Swissprot: Q17127 1e-137 HEXA_BLADI Hexamerin OS=Blaberus discoidalis PE=2 SV=1|Nr: gb|AAX14951.1| 0.0 arylphorin hexamerin-like protein 2 [Romalea microptera]|Nt: gb|AY923852.1| 0.0 Romalea microptera arylphorin hexamerin-like protein 2 mRNA, complete cds|Cog: DR2133 7e-06 --|Kegg: dme:Dmel_CG6806 7e-99 Lsp2; Larval serum protein 2 [EC:3.4.17.1]; K01290 carboxypeptidase A
MergeConsencus49578	2.5948	1.30753	0	14.6692	12.0935	7.95614	0.00400516	8.89693	Swissprot: P87041 3e-14 GMS1_SCHPO UDP-galactose transporter OS=Schizosaccharomyces pombe GN=gms1 PE=2 SV=3|Nr: ref|XP_624386.1| 9e-24 PREDICTED: similar to Csat CG2675-PA [Apis mellifera]|IPR: IPR007271; Nucleotide-sugar transporter|GO: GO:0000139; Golgi membrane; Cellular Component	GO:0012505//endomembrane system;GO:0031224//intrinsic to membrane	GO:0015165//pyrimidine nucleotide sugar transmembrane transporter activity;GO:0005402	GO:0008645//hexose transport;GO:0015781//pyrimidine nucleotidesugar transport	gi|66533109|ref|XP_624386.1|/4.347e20/PREDICTED: similar to Csat CG2675PA [Apis mellifera]
MergeConsencus9504	0.449885	0.293869	0	2.26074	2.2494	1.91991	0.000196574	8.64539	Swissprot: Q6ZRQ5 4e-18 CF167_HUMAN Uncharacterized protein C6orf167 OS=Homo sapiens GN=C6orf167 PE=1 SV=2|Nr: ref|XP_419826.2| 2e-45 PREDICTED: hypothetical protein [Gallus gallus]				gi|224048397|ref|XP_002197314.1|/1.91373e18/PREDICTED: hypothetical protein [Taeniopygia guttata]
MergeConsencus18509	0.0677889	1.99262	0	9.8682	5.64335	2.29732	0.0416241	8.64339	Swissprot: Q5RAG8 6e-95 P4HA1_PONAB Prolyl 4-hydroxylase subunit alpha-1 OS=Pongo abelii GN=P4HA1 PE=2 SV=1|Nr: ref|XP_392392.3| 1e-127 PREDICTED: similar to prolyl-4-hydroxylase-alpha EFB CG31022-PA [Apis mellifera]|IPR: IPR005123; 2OG-Fe(II) oxygenase	GO:0043231//intracellular membranebounded organelle	GO:0046914//transition metal ion binding;GO:0019842//vitamin binding;GO:0019798;GO:0016701//oxidoreductase activity, acting on single donors with incorporation of molecular oxygen	GO:0019471	gi|110757030|ref|XP_392392.3|/1.65565e127/PREDICTED: similar to prolyl4hydroxylasealpha EFB CG31022PA [Apis mellifera]
MergeConsencus52277	0.143837	0.676479	0.222374	3.45589	2.91265	2.27478	0.00130906	8.28945	Swissprot: P97931 4e-81 UNG_MOUSE Uracil-DNA glycosylase OS=Mus musculus GN=Ung PE=2 SV=2|Nr: gb|EEB09870.1| 8e-91 Uracil-DNA glycosylase, putative [Pediculus humanus corporis]|IPR: IPR003249; Uracil-DNA glycosylase, not poxvirus	GO:0043231//intracellular membranebounded organelle	GO:0019104//DNA Nglycosylase activity	GO:0006281//DNA repair;GO:0002562	gi|242003094|ref|XP_002422608.1|/6.52867e71/UracilDNA glycosylase, putative [Pediculus humanus corporis]
MergeConsencus10513	7.60737	10.9453	3.40455	64.7224	46.1128	65.9223	0.000796988	8.05007	Swissprot: Q7M4F0 3e-35 CUD9_SCHGR Endocuticle structural glycoprotein SgAbd-9 OS=Schistocerca gregaria PE=1 SV=1|Nr: sp|Q7M4F0|CUD9_SCHGR 5e-34 RecName: Full=Endocuticle structural glycoprotein SgAbd-9				gi|288558735|ref|NP_001165731.1|/8.79715e10/RR1 cuticle protein 2 [Acyrthosiphon pisum]
MergeConsencus53487	15.1227	1.4996	9.85907	85.2358	81.3747	45.0753	0.00497947	7.99376	Swissprot: Q4V8T0 3e-14 MIOX_DANRE Inositol oxygenase OS=Danio rerio GN=miox PE=2 SV=1|Nr: ref|XP_392190.2| 2e-14 PREDICTED: similar to CG6910-PA [Apis mellifera]|Kegg: dre:571850 6e-14 zgc:114168; zgc:114168 [EC:1.13.99.1]; K00469 inositol oxygenase	GO:0044424//intracellular part	GO:0046914//transition metal ion binding;GO:0016701//oxidoreductase activity, acting on single donors with incorporation of molecular oxygen	GO:0006020//inositol metabolic process	gi|66503826|ref|XP_392190.2|/7.17267e15/PREDICTED: similar to CG6910PA [Apis mellifera]
MergeConsencus47349	0.639273	1.12747	1.72958	8.58327	12.5855	5.77723	0.00871645	7.70697	Swissprot: Q3ZBV9 3e-15 DHR11_BOVIN Dehydrogenase/reductase SDR family member 11 OS=Bos taurus GN=DHRS11 PE=2 SV=1|Nr: ref|XP_002130309.1| 3e-15 PREDICTED: similar to short-chain dehydrogenase/reductase [Ciona intestinalis]|IPR: IPR000169; Peptidase, cysteine peptidase active site		GO:0003824//catalytic activity	GO:0008152//metabolic process	gi|198419888|ref|XP_002130483.1|/9.31947e16/PREDICTED: similar to shortchain dehydrogenase/reductase isoform 2 [Ciona intestinalis]
MergeConsencus17948	96.3006	222.906	34.2614	1055.3	923.835	743.348	0.000870344	7.70221	Swissprot: Q5ZJR8 4e-72 ELOV6_CHICK Elongation of very long chain fatty acids protein 6 OS=Gallus gallus GN=ELOVL6 PE=2 SV=1|Nr: ref|XP_970514.1| 1e-128 PREDICTED: similar to elongase, putative [Tribolium castaneum]|IPR: IPR002076; GNS1/SUR4 membrane protein|GO: GO:0016021; integral to membrane; Cellular Component|Kegg: gga:428772 1e-71 RCJMB04_16d24, ELOVL6; ELOVL family member 6, elongation of …	GO:0031224//intrinsic to membrane		GO:0048232//male gamete generation	gi|91082031|ref|XP_970514.1|/6.67348e129/PREDICTED: similar to elongase, putative [Tribolium castaneum]
Contig127	1.76838	4.67825	0	21.8688	22.3808	4.99411	0.0360233	7.63868	Swissprot: Q8K385 5e-06 FRRS1_MOUSE Ferric-chelate reductase 1 OS=Mus musculus GN=FRRS1 PE=2 SV=1|Nr: gb|AAA29283.1| 5e-19 basic 19k protein precursor prf||1515168A hemolymph protein 19kD
MergeConsencus23157	1.91574	0.693074	0.22783	7.08134	3.48145	10.987	0.0243183	7.59694	Swissprot: P03181 4e-07 YHL1_EBV Uncharacterized protein BHLF1 OS=Epstein-Barr virus (strain B95-8) GN=BHLF1 PE=4 SV=1|Nr: gb|EEB19476.1| 3e-40 conserved hypothetical protein [Pediculus humanus corporis]|IPR: IPR000182; GCN5-related N-acetyltransferase				gi|242023588|ref|XP_002432214.1|/1.3359e40/conserved hypothetical protein [Pediculus humanus corporis]
MergeConsencus25433	0.88707	0.782248	0	5.64173	3.74228	3.25675	0.00468644	7.57241	Swissprot: P27118 2e-13 DCOR_CHICK Ornithine decarboxylase (Fragment) OS=Gallus gallus GN=ODC1 PE=2 SV=1|Nr: ref|XP_968571.2| 3e-13 PREDICTED: similar to ornithine decarboxylase [Tribolium castaneum]|Cog: SPAC144.04c 4e-08 --|Kegg: gga:421937 4e-13 ODC1; ornithine decarboxylase 1 [EC:4.1.1.17]; K01581 ornithine decarboxylase	GO:0044444//cytoplasmic part	GO:0005488//binding;GO:0016831//carboxylyase activity	GO:0051707//response to other organism;GO:0006595//polyamine metabolic process;GO:0001754//eye photoreceptor cell differentiation;GO:0008283//cell proliferation	gi|189239038|ref|XP_968571.2|/1.30353e13/PREDICTED: similar to ornithine decarboxylase [Tribolium castaneum]
MergeConsencus25336	0.903752	0.531305	0	4.15121	1.52506	5.1046	0.0237422	7.5125	Swissprot: P08548 5e-06 LIN1_NYCCO LINE-1 reverse transcriptase homolog OS=Nycticebus coucang PE=1 SV=1				gi|298204333|gb|ADI61815.1|/3.81458e10/endonucleasereverse transcriptase [Bombyx mori]
MergeConsencus51673	0.161716	2.28171	1.87513	7.0853	15.282	9.86485	0.0101258	7.46364	Swissprot: P13284 1e-22 GILT_HUMAN Gamma-interferon-inducible lysosomal thiol reductase OS=Homo sapiens GN=IFI30 PE=1 SV=2|Nr: ref|XP_001947074.1| 2e-34 PREDICTED: similar to CG41378 CG41378-PA [Acyrthosiphon pisum]|IPR: IPR004911; Gamma interferon inducible lysosomal thiol reductase GILT				gi|193624790|ref|XP_001947074.1|/6.2596e34/PREDICTED: similar to CG41378 CG41378PA [Acyrthosiphon pisum]
MergeConsencus39321	0.606334	0.712914	0.133915	3.30537	3.31314	4.20751	0.000427331	7.44997	Swissprot: Q8JGM4 1e-38 QSOX1_CHICK Sulfhydryl oxidase 1 OS=Gallus gallus GN=QSOX1 PE=1 SV=1|Nr: ref|XP_001602334.1| 1e-125 PREDICTED: similar to Quiescin-sulfhydryl oxidase4, putative [Nasonia vitripennis]|IPR: IPR006662; Thioredoxin-related				gi|156541662|ref|XP_001602334.1|/2.60882e125/PREDICTED: similar to Quiescinsulfhydryl oxidase4, putative [Nasonia vitripennis]
MergeConsencus12969	0.672606	0.263611	0	2.85183	2.27001	1.77288	0.00285418	7.36446	Swissprot: Q8C4V4 3e-12 FBXL3_MOUSE F-box/LRR-repeat protein 3 OS=Mus musculus GN=Fbxl3 PE=1 SV=1|Nr: ref|XP_414624.2| 7e-12 PREDICTED: hypothetical protein [Gallus gallus]|Kegg: dre:378451 4e-12 fbxl3a; F-box and leucine-rich repeat protein 3A; K10269 F-box and leucine-rich repeat protein 3				gi|224068042|ref|XP_002187403.1|/3.1566e12/PREDICTED: hypothetical protein [Taeniopygia guttata]
MergeConsencus22784	0	1.63367	0	3.60018	2.60517	5.75512	0.0165289	7.32121	Swissprot: Q62789 5e-20 UD2B8_RAT UDP-glucuronosyltransferase 2B8 OS=Rattus norvegicus GN=Ugt2b8 PE=2 SV=1|Nr: ref|XP_002019741.1| 2e-42 GL12558 [Drosophila persimilis] gb|EDW38375.1| GL12558 [Drosophila persimilis]|IPR: IPR002213; UDP-glucuronosyl/UDP-glucosyltransferase|GO: GO:0008152; metabolic process; Biological Process		GO:0016740//transferase activity		gi|195157714|ref|XP_002019741.1|/8.09548e43/GL12558 [Drosophila persimilis]
MergeConsencus44356	0.214321	0.503988	0.497017	3.33196	3.1344	2.17896	0.00127696	7.11358	Swissprot: Q9CXE6 4e-40 XRCC3_MOUSE DNA-repair protein XRCC3 OS=Mus musculus GN=Xrcc3 PE=2 SV=1|Nr: ref|XP_790563.2| 7e-50 PREDICTED: hypothetical protein [Strongylocentrotus purpuratus] ref|XP_001193147.1| PREDICTED: hypothetical protein [Strongylocentrotus purpuratus]|IPR: IPR001553; RecA bacterial DNA recombination	GO:0043231//intracellular membranebounded organelle;GO:0044444//cytoplasmic part		GO:0006259//DNA metabolic process;GO:0033554//cellular response to stress	gi|115754819|ref|XP_790563.2|/2.03649e50/PREDICTED: hypothetical protein [Strongylocentrotus purpuratus]
Contig4261	20.3612	39.2769	8.60749	179.856	98.7821	205.93	0.00715543	7.10037	Swissprot: Q17127 8e-35 HEXA_BLADI Hexamerin OS=Blaberus discoidalis PE=2 SV=1|Nr: gb|AAX14951.1| 5e-73 arylphorin hexamerin-like protein 2 [Romalea microptera]|Nt: gb|AY923852.1| 4e-89 Romalea microptera arylphorin hexamerin-like protein 2 mRNA, complete cds|Cog: YGR189c 4e-06 --|Kegg: dme:Dmel_CG6806 2e-28 Lsp2; Larval serum protein 2 [EC:3.4.17.1]; K01290 carboxypeptidase A
MergeConsencus13299	3.31942	5.48845	0.160372	30.934	13.6535	18.3973	0.0143431	7.0231	Swissprot: Q8BKE9 3e-10 IFT74_MOUSE Intraflagellar transport protein 74 homolog OS=Mus musculus GN=Ift74 PE=1 SV=2|Nr: ref|XP_789962.1| 1e-09 PREDICTED: hypothetical protein [Strongylocentrotus purpuratus] ref|XP_001185752.1| PREDICTED: hypothetical protein [Strongylocentrotus purpuratus]	GO:0031410//cytoplasmic vesicle			gi|291222705|ref|XP_002731357.1|/4.9981e10/PREDICTED: coiledcoil domain containing 2like [Saccoglossus kowalevskii]
MergeConsencus17755	0.861805	1.8577	0.555154	8.52608	8.24091	5.35445	0.00222336	6.75534	Swissprot: Q24317 1e-122 PRI1_DROME DNA primase small subunit OS=Drosophila melanogaster GN=DNApol-alpha50 PE=1 SV=2|Nr: ref|XP_001648424.1| 1e-142 DNA primase [Aedes aegypti] gb|EAT33409.1| DNA primase [Aedes aegypti]|IPR: IPR002755; DNA primase, small subunit|GO: GO:0003896; DNA primase activity; Molecular Function		GO:0003899//DNAdirected RNA polymerase activity	GO:0006259//DNA metabolic process	gi|157104474|ref|XP_001648424.1|/5.60738e143/DNA primase [Aedes aegypti]
MergeConsencus1992	0.703333	1.98471	0.652421	6.56065	8.07064	7.78627	0.000281291	6.71091	Swissprot: P13284 2e-24 GILT_HUMAN Gamma-interferon-inducible lysosomal thiol reductase OS=Homo sapiens GN=IFI30 PE=1 SV=2|Nr: ref|XP_001947074.1| 2e-36 PREDICTED: similar to CG41378 CG41378-PA [Acyrthosiphon pisum]|IPR: IPR004911; Gamma interferon inducible lysosomal thiol reductase GILT|Kegg: mcc:719379 2e-24 LOC719379; similar to Gamma-interferon-inducible lysosomal thiol reductase precursor (…				gi|193624790|ref|XP_001947074.1|/8.0403e36/PREDICTED: similar to CG41378 CG41378PA [Acyrthosiphon pisum]
MergeConsencus10666	3.9203	1.84376	10.3035	32.1359	51.3798	23.9142	0.0116742	6.68614	Swissprot: Q3ZBV9 4e-19 DHR11_BOVIN Dehydrogenase/reductase SDR family member 11 OS=Bos taurus GN=DHRS11 PE=2 SV=1|Nr: ref|XP_002130290.1| 7e-23 PREDICTED: similar to short-chain dehydrogenase/reductase isoform 1 [Ciona intestinalis]|Cog: slr0315 5e-12 --|Kegg: dme:Dmel_CG1386 2e-15 antdh; antdh [EC:1.1.1.184]; K00079 carbonyl reductase (NADPH)				gi|198419894|ref|XP_002130290.1|/2.93334e23/PREDICTED: similar to shortchain dehydrogenase/reductase isoform 1 [Ciona intestinalis]
MergeConsencus52141	0.7959	5.02993	0.230715	9.42075	18.5791	12.1377	0.0108514	6.62712	Swissprot: Q9U943 0.0 APLP_LOCMI Apolipophorins OS=Locusta migratoria PE=1 SV=2|Nr: sp|Q9U943|APLP_LOCMI 0.0 RecName: Full=Apolipophorins; Contains: RecName: Full=Apolipophorin-2; AltName: Full=Apolipophorin II; AltName: Full=apoLp-2; Contains: RecName: Full=Apolipophorin-1; AltName: Full=Apolipophorin I; AltName: Full=apoLp-1; Flags: Precursor				gi|146196714|emb|CAB51918.2|/0/apolipophorin precursor [Locusta migratoria]
MergeConsencus4490	2.17054	2.29687	1.1745	13.8046	12.6975	10.2982	0.000343554	6.52266	Swissprot: Q8C436 1e-19 CN138_MOUSE Uncharacterized protein C14orf138 homolog OS=Mus musculus GN=Gm71 PE=2 SV=2|Nr: ref|XP_001604308.1| 3e-21 PREDICTED: similar to MGC97646 protein [Nasonia vitripennis]				gi|156550981|ref|XP_001604308.1|/1.35166e21/PREDICTED: similar to MGC97646 protein [Nasonia vitripennis]
MergeConsencus33720	0.206938	3.6497	0.479896	7.31177	10.9417	9.81821	0.00340254	6.47331	Nr: ref|ZP_02322168.1| 1e-08 conserved hypothetical protein [Anaeromyxobacter dehalogenans 2CP-1] gb|EDR84742.1| conserved hypothetical protein [Anaeromyxobacter dehalogenans 2CP-1]|Kegg: ptr:450139 2e-07 HSPA2; heat shock 70kDa protein 2; K03283 heat shock 70kDa protein 1/8
MergeConsencus14611	5.95501	12.7495	0.961881	66.1376	28.347	32.6312	0.0224515	6.46361	Swissprot: Q70LM4 1e-131 LGRD_BREPA Linear gramicidin synthetase subunit D OS=Brevibacillus parabrevis GN=lgrD PE=1 SV=1|Nr: ref|XP_002112422.1| 0.0 hypothetical protein TRIADDRAFT_25485 [Trichoplax adhaerens] gb|EDV24532.1| hypothetical protein TRIADDRAFT_25485 [Trichoplax adhaerens]|IPR: IPR000873; AMP-dependent synthetase and ligase		GO:0003824//catalytic activity;GO:0005488//binding		gi|196005111|ref|XP_002112422.1|/0/hypothetical protein TRIADDRAFT_25485 [Trichoplax adhaerens]
Contig3642	0.386833	0.909659	0.299026	4.92049	2.17591	3.05889	0.013228	6.36488	Swissprot: Q9NB34 2e-42 RL34_AEDTR 60S ribosomal protein L34 OS=Aedes triseriatus GN=RpL34 PE=2 SV=3|Nr: ref|XP_001601949.1| 4e-56 PREDICTED: similar to ribosomal protein L34 isoform 2 [Nasonia vitripennis] ref|XP_001601922.1| PREDICTED: similar to ribosomal protein L34 isoform 1 [Nasonia vitripennis]|Nt: ref|XM_001601872.1| 3e-34 PREDICTED: Nasonia vitripennis similar to ribosomal protein L34, t…
MergeConsencus992	9.66506	19.0237	8.62697	75.469	64.5775	94.4024	0.0010667	6.28285	Swissprot: Q7SYD5 1e-121 SC31A_DANRE Protein transport protein Sec31A OS=Danio rerio GN=sec31a PE=2 SV=1|Nr: ref|XP_973673.1| 1e-160 PREDICTED: similar to vesicle associated protein, putative [Tribolium castaneum]|Cog: mlr2363 3e-07 --|Kegg: pic:PICST_80311 6e-27 SEC31; component of the COPII coat of ER-Golgi vesicles [EC:3.1.1.3]; K01046 triacylglycerol lipase	GO:0043231//intracellular membranebounded organelle;GO:0044444//cytoplasmic part;GO:0044446//intracellular organelle part			gi|158288080|ref|XP_309957.4|/1.44832e115/AGAP011551PA [Anopheles gambiae str. PEST]
MergeConsencus462	2.23943	2.56556	0.621423	15.2572	9.94812	7.91364	0.00763432	6.10327	Swissprot: Q28BS0 0.0 MCM3Z_XENTR Zygotic DNA replication licensing factor mcm3 OS=Xenopus tropicalis GN=zmcm3 PE=2 SV=1|Nr: ref|XP_625020.2| 0.0 PREDICTED: similar to Minichromosome maintenance 3 CG4206-PA [Apis mellifera]|IPR: IPR001208; MCM	GO:0043231//intracellular membranebounded organelle;GO:0043234//protein complex;GO:0032993//proteinDNA complex	GO:0003678//DNA helicase activity;GO:0000166//nucleotide binding	GO:0060255;GO:0006270//DNAdependent DNA replication initiation;GO:0010467//gene expression	gi|110759115|ref|XP_625020.2|/0/PREDICTED: similar to Minichromosome maintenance 3 CG4206PA [Apis mellifera]
MergeConsencus21791	0.545146	0.427313	0.0702339	3.21028	2.19759	0.923733	0.0298632	6.07236	Swissprot: Q7TMV1 7e-10 RN139_MOUSE RING finger protein 139 OS=Mus musculus GN=Rnf139 PE=1 SV=1|Nr: ref|XP_001812909.1| 5e-89 PREDICTED: similar to predicted protein [Tribolium castaneum]|Kegg: dre:406442 3e-08 amfr; autocrine motility factor receptor [EC:6.3.2.19]; K10636 autocrine motility factor receptor	GO:0044464//cell part	GO:0005488//binding	GO:0050789//regulation of biological process	gi|268370140|ref|NP_001161251.1|/6.39444e86/hypothetical protein LOC100141687 [Tribolium castaneum]
MergeConsencus55890	0.366036	0.860753	0	3.87996	1.44125	2.06745	0.0282387	6.02276	Swissprot: P49916 1e-122 DNL3_HUMAN DNA ligase 3 OS=Homo sapiens GN=LIG3 PE=1 SV=1|Nr: ref|XP_967954.1| 1e-137 PREDICTED: similar to rCG33581 [Tribolium castaneum]|IPR: IPR012308; DNA ligase, N-terminal	GO:0031981//nuclear lumen	GO:0003909//DNA ligase activity;GO:0046872//metal ion binding;GO:0000166//nucleotide binding	GO:0048232//male gamete generation;GO:0002562	gi|91076374|ref|XP_967954.1|/8.70695e138/PREDICTED: similar to rCG33581 [Tribolium castaneum]
MergeConsencus20599	0.482855	0.567731	0	2.72973	1.35801	2.18182	0.00813772	5.96768	Nr: gb|AAX14951.1| 5e-06 arylphorin hexamerin-like protein 2 [Romalea microptera]|IPR: IPR007087; Zinc finger, C2H2-type|GO: GO:0003676; nucleic acid binding; Molecular Function				gi|60256959|gb|AAX14951.1|/2.28589e06/arylphorin hexamerinlike protein 2 [Romalea microptera]
MergeConsencus18015	1.93968	4.33319	2.39903	22.2053	18.3297	9.86017	0.0100556	5.81132	Swissprot: P70583 2e-52 DUT_RAT Deoxyuridine 5'-triphosphate nucleotidohydrolase OS=Rattus norvegicus GN=Dut PE=2 SV=3|Nr: ref|XP_001662757.1| 6e-56 deoxyuridine 5'-triphosphate nucleotidohydrolase [Aedes aegypti] gb|EAT35185.1| deoxyuridine 5'-triphosphate nucleotidohydrolase [Aedes aegypti]|IPR: IPR003232; dCTP Deaminase	GO:0043231//intracellular membranebounded organelle	GO:0047429//nucleosidetriphosphate diphosphatase activity	GO:0009211	gi|119114540|ref|XP_319329.3|/5.26319e49/AGAP010159PA [Anopheles gambiae str. PEST]
Contig5533	706.821	494.407	172.018	3888.08	2151.64	1904.45	0.0135704	5.78496	Swissprot: Q17127 1e-136 HEXA_BLADI Hexamerin OS=Blaberus discoidalis PE=2 SV=1|Nr: gb|AAX14951.1| 0.0 arylphorin hexamerin-like protein 2 [Romalea microptera]|Nt: gb|AY923852.1| 0.0 Romalea microptera arylphorin hexamerin-like protein 2 mRNA, complete cds|Cog: YGL028c 1e-07 --|Kegg: dme:Dmel_CG6806 1e-99 Lsp2; Larval serum protein 2 [EC:3.4.17.1]; K01290 carboxypeptidase A
MergeConsencus23924	1.81231	0	0.420282	2.04911	5.30095	5.52764	0.0234647	5.76804	Swissprot: Q4V8T0 3e-11 MIOX_DANRE Inositol oxygenase OS=Danio rerio GN=miox PE=2 SV=1|Nr: gb|EEB19265.1| 2e-10 Inositol oxygenase, putative [Pediculus humanus corporis]|Kegg: dre:571850 6e-11 zgc:114168; zgc:114168 [EC:1.13.99.1]; K00469 inositol oxygenase	GO:0044424//intracellular part	GO:0046914//transition metal ion binding;GO:0016701//oxidoreductase activity, acting on single donors with incorporation of molecular oxygen	GO:0006020//inositol metabolic process	gi|242023158|ref|XP_002432003.1|/6.33529e11/Inositol oxygenase, putative [Pediculus humanus corporis]
MergeConsencus13097	2.16799	2.14659	0.264613	9.67605	3.08079	13.4054	0.0399942	5.71328	Swissprot: P03181 2e-06 YHL1_EBV Uncharacterized protein BHLF1 OS=Epstein-Barr virus (strain B95-8) GN=BHLF1 PE=4 SV=1|Nr: gb|ABF18231.1| 1e-35 predicted acetyltransferase [Aedes aegypti]|IPR: IPR000182; GCN5-related N-acetyltransferase				gi|94468764|gb|ABF18231.1|/6.16292e36/predicted acetyltransferase [Aedes aegypti]
MergeConsencus28679	2.73954	2.50529	1.4118	12.0458	6.50632	19.256	0.0245022	5.67977	Nr: ref|XP_001179836.1| 3e-08 PREDICTED: similar to endonuclease-reverse transcriptase [Strongylocentrotus purpuratus] ref|XP_001182134.1| PREDICTED: similar to endonuclease-reverse transcriptase [Strongylocentrotus purpuratus]|IPR: IPR000477; RNA-directed DNA polymerase (reverse transcriptase)|GO: GO:0003723; RNA binding; Molecular Function				gi|115738257|ref|XP_001179836.1|/1.2151e08/PREDICTED: similar to endonucleasereverse transcriptase [Strongylocentrotus purpuratus]
MergeConsencus44201	1.28458	0.215768	0.141856	2.33425	2.68381	3.93875	0.00813973	5.45415	Swissprot: P28019 2e-27 DYR_AEDAL Dihydrofolate reductase OS=Aedes albopictus GN=DHFR PE=3 SV=1|Nr: ref|XP_001605781.1| 3e-31 PREDICTED: similar to conserved hypothetical protein [Nasonia vitripennis]|IPR: IPR001796; Dihydrofolate reductase region|GO: GO:0004146; dihydrofolate reductase activity; Molecular Function			GO:0055086//nucleobase, nucleoside and nucleotide metabolic process;GO:0044271//cellular nitrogen compound biosynthetic process;GO:0044283	gi|156543718|ref|XP_001605781.1|/1.42672e31/PREDICTED: similar to conserved hypothetical protein [Nasonia vitripennis]
MergeConsencus10617	0.654221	0.84614	0.050572	3.05127	2.94396	2.43883	0.000837284	5.43805	Swissprot: Q7Q0Q1 0.0 MCM6_ANOGA DNA replication licensing factor Mcm6 OS=Anopheles gambiae GN=Mcm6 PE=3 SV=3|Nr: ref|XP_969603.1| 0.0 PREDICTED: similar to AGAP010219-PA [Tribolium castaneum]|IPR: IPR001208; MCM	GO:0043234//protein complex;GO:0031981//nuclear lumen	GO:0005515//protein binding;GO:0004386//helicase activity;GO:0032559//adenyl ribonucleotide binding;GO:0043566//structurespecific DNA binding	GO:0007049//cell cycle;GO:0006261//DNAdependent DNA replication;GO:0010467//gene expression	gi|170046023|ref|XP_001850585.1|/0/DNA replication licensing factor Mcm6 [Culex quinquefasciatus]
Contig3293	14.8054	19.3861	26.0109	140.292	106.749	79.8235	0.00375487	5.42943	Swissprot: P36241 1e-91 RL19_DROME 60S ribosomal protein L19 OS=Drosophila melanogaster GN=RpL19 PE=1 SV=2|Nr: emb|CAJ17304.1| 7e-96 ribosomal protein L19e [Meladema coriacea]|Nt: dbj|AK281835.1| 1e-49 Gryllus bimaculatus mRNA, GBcontig28696|Cog: SPBC56F2.02 9e-66 --|Kegg: dme:Dmel_CG2746 2e-91 RpL19; Ribosomal protein L19; K02885 large subunit ribosomal protein L19e
MergeConsencus5984	36.1509	61.8844	9.92506	228.052	176.814	180.529	0.00101861	5.42232	Swissprot: Q7JZB4 1e-173 GMPPB_DROME Mannose-1-phosphate guanyltransferase beta OS=Drosophila melanogaster GN=CG1129 PE=2 SV=1|Nr: ref|XP_002000465.1| 1e-173 GI10243 [Drosophila mojavensis] gb|EDW15926.1| GI10243 [Drosophila mojavensis]|IPR: IPR001451; Bacterial transferase hexapeptide repeat		GO:0032561//guanyl ribonucleotide binding;GO:0008905	GO:0008152//metabolic process	gi|195111801|ref|XP_002000465.1|/2.41895e173/GI10243 [Drosophila mojavensis]
MergeConsencus14504	7.19523	16.2802	0.560873	47.7696	67.4771	13.9338	0.0488735	5.3744	Swissprot: P27674 1e-125 GTR1_BOVIN Solute carrier family 2, facilitated glucose transporter member 1 OS=Bos taurus GN=SLC2A1 PE=2 SV=1|Nr: ref|XP_392938.2| 0.0 PREDICTED: similar to Glucose transporter 1 CG1086-PB, isoform B isoform 1 [Apis mellifera]|IPR: IPR000803; Facilitated glucose transporter	GO:0016020//membrane	GO:0016491//oxidoreductase activity;GO:0022857//transmembrane transporter activity	GO:0006810//transport	gi|66547465|ref|XP_392938.2|/0/PREDICTED: similar to Glucose transporter 1 CG1086PB, isoform B isoform 1 [Apis mellifera]
MergeConsencus2251	0.172555	0.541031	0.177849	1.54455	2.07064	1.16956	0.00541098	5.36746	Swissprot: P49735 0.0 MCM2_DROME DNA replication licensing factor Mcm2 OS=Drosophila melanogaster GN=Mcm2 PE=1 SV=1|Nr: ref|XP_970643.2| 0.0 PREDICTED: similar to DNA replication licensing factor MCM2 [Tribolium castaneum]|IPR: IPR001208; MCM	GO:0043231//intracellular membranebounded organelle;GO:0032993//proteinDNA complex	GO:0003678//DNA helicase activity;GO:0003676//nucleic acid binding;GO:0032559//adenyl ribonucleotide binding	GO:0051276//chromosome organization;GO:0006261//DNAdependent DNA replication	gi|297488852|ref|XP_002707828.1|/0/PREDICTED: KIAA0030like [Bos taurus]
MergeConsencus13024	0.356765	0.629214	0.689458	3.27746	3.81287	1.81358	0.00823805	5.31439	Swissprot: P24650 4e-11 Y007_NPVAC Uncharacterized 23.6 kDa protein in LEF2-PH intergenic region OS=Autographa californica nuclear polyhedrosis virus PE=4 SV=2|Nr: ref|NP_054036.1| 6e-10 ORF603 peptide [Autographa californica nucleopolyhedrovirus] ref|YP_758473.1| hypothetical protein PXMNV_gp007 [Plutella xylostella multiple nucleopolyhedrovirus] sp|P24650|Y007_NPVAC RecName: Full=Uncharacterize…
MergeConsencus14418	1.14532	2.69327	2.0658	14.5683	3.00641	13.8006	0.0434208	5.3139	IPR: IPR006170; Pheromone/general odorant binding protein, PBP/GOBP
MergeConsencus5991	0.573596	2.52908	0.554245	6.62053	6.56041	5.99363	0.000823258	5.24337	Swissprot: Q9Y625 1e-125 GPC6_HUMAN Glypican-6 OS=Homo sapiens GN=GPC6 PE=2 SV=1|Nr: ref|XP_001607767.1| 1e-145 PREDICTED: similar to GA16712-PA [Nasonia vitripennis]|IPR: IPR001863; Glypican|GO: GO:0005578; proteinaceous extracellular matrix; Cellular Component|Kegg: ptr:452621 1e-125 GPC6; glypican 6; K08112 glypican 6	GO:0005576//extracellular region;GO:0016021//integral to membrane			gi|242013271|ref|XP_002427335.1|/3.32837e125/Glypican6 precursor, putative [Pediculus humanus corporis]
MergeConsencus1371	9.47786	9.47228	0.366325	46.8836	23.9905	29.4432	0.0115849	5.19336	Nr: gb|AAX14951.1| 1e-07 arylphorin hexamerin-like protein 2 [Romalea microptera]				gi|60256959|gb|AAX14951.1|/2.47675e08/arylphorin hexamerinlike protein 2 [Romalea microptera]
MergeConsencus5113	2.47336	1.98977	0.905655	15.6385	7.17592	4.99984	0.0422752	5.18073	Swissprot: P29981 1e-121 CP4C1_BLADI Cytochrome P450 4C1 OS=Blaberus discoidalis GN=CYP4C1 PE=2 SV=1|Nr: emb|CAQ57675.1| 1e-125 cytochrome P450 [Nilaparvata lugens]|IPR: IPR001128; Cytochrome P450	GO:0044464//cell part	GO:0046872//metal ion binding;GO:0016491//oxidoreductase activity		gi|189178726|emb|CAQ57675.1|/3.52367e125/cytochrome P450 [Nilaparvata lugens]
MergeConsencus24755	1.20045	1.00819	0.132566	3.39325	3.08683	5.61806	0.00980089	5.16749	IPR: IPR010916; TonB box, conserved site
MergeConsencus18289	0.337043	1.18886	1.04215	7.14527	4.17085	1.9037	0.0412365	5.14779	Swissprot: P0C6S9 2e-15 CTF8_BOVIN Chromosome transmission fidelity protein 8 homolog OS=Bos taurus GN=CHTF8 PE=3 SV=1|Nr: ref|XP_002026523.1| 3e-17 GL15472 [Drosophila persimilis] gb|EDW33472.1| GL15472 [Drosophila persimilis]				gi|195171459|ref|XP_002026523.1|/1.50308e17/GL15472 [Drosophila persimilis]
MergeConsencus11995	0.523176	1.23028	0.485305	4.28862	3.29596	3.90063	0.00060929	5.13017	Swissprot: Q9NGX9 1e-122 CP302_DROME Cytochrome P450 302a1, mitochondrial OS=Drosophila melanogaster GN=dib PE=2 SV=2|Nr: gb|EEB13546.1| 1e-147 cytochrome P450, putative [Pediculus humanus corporis]|IPR: IPR001128; Cytochrome P450	GO:0043231//intracellular membranebounded organelle	GO:0046872//metal ion binding;GO:0008395//steroid hydroxylase activity	GO:0008205//ecdysone metabolic process;GO:0048565//digestive tract development;GO:0040003//chitinbased cuticle development;GO:0001700//embryonic development via the syncytial blastoderm;GO:0007399//nervous system development	gi|242011078|ref|XP_002426284.1|/1.6988e143/cytochrome P450, putative [Pediculus humanus corporis]
MergeConsencus3445	0.377305	1.33088	0.680543	6.39906	2.12231	3.69392	0.0313684	5.11372	Swissprot: Q94913 2e-14 REG5_DROME Rhythmically expressed gene 5 protein OS=Drosophila melanogaster GN=Reg-5 PE=2 SV=2|Nr: ref|XP_001604403.1| 6e-31 PREDICTED: similar to ENSANGP00000010771 [Nasonia vitripennis]				gi|239787925|dbj|BAH70664.1|/6.43523e37/ACYPI33427 [Acyrthosiphon pisum]
MergeConsencus10071	1.54733	5.31801	0	14.6353	4.82047	15.1936	0.0337648	5.047	Swissprot: Q64435 5e-39 UD16_MOUSE UDP-glucuronosyltransferase 1-6 OS=Mus musculus GN=Ugt1a6 PE=1 SV=1|Nr: ref|XP_967762.1| 9e-70 PREDICTED: similar to glucosyl/glucuronosyl transferases [Tribolium castaneum]|IPR: IPR002213; UDP-glucuronosyl/UDP-glucosyltransferase|GO: GO:0008152; metabolic process; Biological Process				gi|91090210|ref|XP_967762.1|/3.40001e66/PREDICTED: similar to glucosyl/glucuronosyl transferases [Tribolium castaneum]
MergeConsencus18661	0.643554	1.41877	0.310921	5.00253	3.34845	3.45319	0.0037182	4.97386	Swissprot: Q6NX31 0.0 MCM7_XENTR DNA replication licensing factor mcm7 OS=Xenopus tropicalis GN=mcm7 PE=2 SV=1|Nr: ref|XP_967422.1| 0.0 PREDICTED: similar to DNA replication licensing factor MCM7 [Tribolium castaneum]|IPR: IPR001208; MCM	GO:0043231//intracellular membranebounded organelle;GO:0043234//protein complex;GO:0015630//microtubule cytoskeleton;GO:0044427//chromosomal part;GO:0032993//proteinDNA complex	GO:0003678//DNA helicase activity;GO:0000166//nucleotide binding	GO:0060255;GO:0006270//DNAdependent DNA replication initiation;GO:0010467//gene expression	gi|91082353|ref|XP_967422.1|/0/PREDICTED: similar to DNA replication licensing factor MCM7 [Tribolium castaneum]
MergeConsencus15042	2.80633	2.16537	1.35583	10.1635	12.2337	8.91606	0.000695176	4.94874	Swissprot: Q5IS58 9e-30 TGIF1_PANTR Homeobox protein TGIF1 OS=Pan troglodytes GN=TGIF1 PE=2 SV=1|Nr: ref|XP_001122713.1| 9e-63 PREDICTED: similar to achintya CG8819-PA, isoform A [Apis mellifera]|IPR: IPR001356; Homeobox	GO:0043231//intracellular membranebounded organelle	GO:0003677//DNA binding;GO:0001071	GO:0010468//regulation of gene expression;GO:0006351//transcription, DNAdependent	gi|110757224|ref|XP_001122713.1|/3.43455e45/PREDICTED: similar to achintya CG8819PA, isoform A [Apis mellifera]
MergeConsencus42827	3.58993	1.55509	0	12.5508	5.95164	5.9763	0.0284037	4.75776	Swissprot: O44390 2e-26 ACO11_TRINI Acyl-CoA Delta(11) desaturase OS=Trichoplusia ni GN=D11DS PE=2 SV=2|Nr: gb|AAT01079.1| 5e-42 putative delta-9 desaturase 1 [Homalodisca coagulata]|IPR: IPR001522; Fatty acid desaturase, type 1, C-terminal	GO:0044444//cytoplasmic part	GO:0016215	GO:0042446//hormone biosynthetic process;GO:0006631//fatty acid metabolic process	gi|46561748|gb|AAT01079.1|/2.22941e42/putative delta9 desaturase 1 [Homalodisca vitripennis]
MergeConsencus5797	52.1571	34.2558	18.5053	172.049	249.716	76.871	0.0307459	4.75263	Swissprot: Q9XT55 6e-48 UDB19_MACFA UDP-glucuronosyltransferase 2B19 OS=Macaca fascicularis GN=UGT2B19 PE=1 SV=1|Nr: ref|XP_002091564.1| 3e-70 GE13733 [Drosophila yakuba] gb|EDW91276.1| GE13733 [Drosophila yakuba]|Cog: BS_yjiC 6e-07 --|Kegg: dpo:Dpse_GA13878 2e-55 GA13878-PA [EC:2.4.1.17]; K00699 glucuronosyltransferase				gi|156545201|ref|XP_001603802.1|/7.44676e61/PREDICTED: similar to glucosyl/glucuronosyl transferases [Nasonia vitripennis]
MergeConsencus7645	3.80179	6.78216	2.12812	23.9013	18.7301	17.3268	0.00143518	4.71664	Swissprot: O60774 4e-34 FMO6_HUMAN Putative dimethylaniline monooxygenase [N-oxide-forming] 6 OS=Homo sapiens GN=FMO6 PE=2 SV=1|Nr: ref|XP_311550.4| 2e-91 AGAP010399-PA [Anopheles gambiae str. PEST] gb|EAA07128.4| AGAP010399-PA [Anopheles gambiae str. PEST]|IPR: IPR000759; Adrenodoxin reductase				gi|158289932|ref|XP_311550.4|/6.66281e92/AGAP010399PA [Anopheles gambiae str. PEST]
MergeConsencus4132	10.8043	10.9466	3.37629	41.9114	36.7228	39.8613	0.000219437	4.71581	Swissprot: O16852 1e-120 PCNA_SARCR Proliferating cell nuclear antigen OS=Sarcophaga crassipalpis GN=PCNA PE=3 SV=1|Nr: ref|XP_001662644.1| 1e-125 proliferating cell nuclear antigen [Aedes aegypti] gb|AAY82461.1| proliferating cell nuclear antigen [Aedes aegypti] gb|EAT35273.1| proliferating cell nuclear antigen [Aedes aegypti]|IPR: IPR000730; Proliferating cell nuclear antigen, PCNA|GO: GO:00036…	GO:0043231//intracellular membranebounded organelle;GO:0043234//protein complex;GO:0015630//microtubule cytoskeleton	GO:0003676//nucleic acid binding;GO:0030234//enzyme regulator activity	GO:0000278//mitotic cell cycle;GO:0006281//DNA repair;GO:0006959//humoral immune response;GO:0006271//DNA strand elongation involved in DNA replication;GO:0006277//DNA amplification	gi|157167857|ref|XP_001662644.1|/1.41752e125/proliferating cell nuclear antigen [Aedes aegypti]
MergeConsencus29100	1.20797	2.36718	3.46275	14.9385	12.6835	5.28775	0.0223346	4.67608	Swissprot: Q8T0S6 1e-156 HIPPO_DROME Serine/threonine-protein kinase hippo OS=Drosophila melanogaster GN=hpo PE=1 SV=1|Nr: ref|XP_001652034.1| 0.0 serine/threonine protein kinase [Aedes aegypti] gb|EAT41841.1| serine/threonine protein kinase [Aedes aegypti]|IPR: IPR000719; Protein kinase, core		GO:0004674//protein serine/threonine kinase activity;GO:0032559//adenyl ribonucleotide binding	GO:0009314//response to radiation;GO:0043704//photoreceptor cell fate specification;GO:0045926//negative regulation of growth;GO:0007423//sensory organ development;GO:0002009//morphogenesis of an epithelium;GO:0008630//DNA damage response, signal transduc	gi|157113643|ref|XP_001652034.1|/0/serine/threonine protein kinase [Aedes aegypti]
Contig4594	60.182	29.8067	128.73	448.587	411.092	161.579	0.0238003	4.66927	Swissprot: Q25641 4e-51 CRPI_PERAM Allergen Cr-PI OS=Periplaneta americana PE=1 SV=1|Nr: gb|AAX14951.1| 1e-127 arylphorin hexamerin-like protein 2 [Romalea microptera]|Nt: gb|AY923852.1| 1e-104 Romalea microptera arylphorin hexamerin-like protein 2 mRNA, complete cds|Cog: DR2133 2e-06 --|Kegg: dme:Dmel_CG6806 5e-36 Lsp2; Larval serum protein 2 [EC:3.4.17.1]; K01290 carboxypeptidase A
MergeConsencus18028	3.3709	3.46102	0.403706	12.4137	13.0858	7.99127	0.00487854	4.62859	Swissprot: P07742 0.0 RIR1_MOUSE Ribonucleoside-diphosphate reductase large subunit OS=Mus musculus GN=Rrm1 PE=2 SV=1|Nr: ref|XP_554103.3| 0.0 AGAP010198-PA [Anopheles gambiae str. PEST] gb|EAL39294.3| AGAP010198-PA [Anopheles gambiae str. PEST]|IPR: IPR000788; Ribonucleotide reductase large subunit, C-terminal	GO:0043234//protein complex;GO:0044424//intracellular part	GO:0032559//adenyl ribonucleotide binding;GO:0016728	GO:0006259//DNA metabolic process;GO:0051262//protein tetramerization;GO:0009165//nucleotide biosynthetic process	gi|158299261|ref|XP_554103.3|/0/AGAP010198PA [Anopheles gambiae str. PEST]
Contig4219	16.8006	45.716	1.29871	119.402	41.8511	132.309	0.0347617	4.60019	Swissprot: Q17127 6e-53 HEXA_BLADI Hexamerin OS=Blaberus discoidalis PE=2 SV=1|Nr: gb|AAX14951.1| 3e-73 arylphorin hexamerin-like protein 2 [Romalea microptera]|Cog: DRA0210 4e-07 --|Kegg: dme:Dmel_CG6806 7e-35 Lsp2; Larval serum protein 2 [EC:3.4.17.1]; K01290 carboxypeptidase A
MergeConsencus18607	5.53105	9.42504	1.79697	32.4016	24.1679	20.2838	0.0044082	4.58742	Swissprot: Q561P5 0.0 MCM5_XENTR DNA replication licensing factor mcm5 OS=Xenopus tropicalis GN=mcm5 PE=2 SV=1|Nr: ref|XP_624292.1| 0.0 PREDICTED: similar to Minichromosome maintenance 5 CG4082-PA [Apis mellifera]|IPR: IPR001208; MCM	GO:0031981//nuclear lumen;GO:0044427//chromosomal part;GO:0043234//protein complex	GO:0003676//nucleic acid binding;GO:0032559//adenyl ribonucleotide binding;GO:0003678//DNA helicase activity	GO:0007131//reciprocal meiotic recombination;GO:0006270//DNAdependent DNA replication initiation;GO:0010468//regulation of gene expression;GO:0051276//chromosome organization;GO:0006915//apoptosis	gi|66535555|ref|XP_624292.1|/0/PREDICTED: similar to Minichromosome maintenance 5 CG4082PA [Apis mellifera]
MergeConsencus7800	5.21801	9.93321	4.41773	33.7131	32.4258	23.2973	0.00163189	4.57031	Swissprot: Q9NR33 4e-20 DPOE4_HUMAN DNA polymerase epsilon subunit 4 OS=Homo sapiens GN=POLE4 PE=1 SV=2|Nr: gb|EEB11445.1| 1e-25 DNA polymerase epsilon subunit, putative [Pediculus humanus corporis]|Cog: SPBC3B8.02 2e-09 --|Kegg: xtr:549359 5e-23 pole4; polymerase (DNA-directed), epsilon 4 (p12 subunit) [EC:2.7.7.7]; K03506 DNA polymerase epsilon subunit 4
MergeConsencus4951	2.68495	3.92358	1.1267	10.6794	14.7143	9.7924	0.00298533	4.54881	Swissprot: Q6AX23 1e-87 QSOX2_XENLA Sulfhydryl oxidase 2 OS=Xenopus laevis GN=qsox2 PE=2 SV=1|Nr: gb|EEB17630.1| 1e-154 protein disulfide-isomerase 1 precursor, putative [Pediculus humanus corporis]|IPR: IPR006662; Thioredoxin-related				gi|242019843|ref|XP_002430368.1|/1.67554e149/protein disulfideisomerase 1 precursor, putative [Pediculus humanus corporis]
MergeConsencus5373	5.59299	5.84544	3.84306	31.9117	27.2655	9.82817	0.0284172	4.51561	Swissprot: Q6CUV0 2e-06 SPC25_KLULA Probable kinetochore protein SPC25 OS=Kluyveromyces lactis GN=SPC25 PE=3 SV=1|IPR: IPR013255; Kinetochore-Ndc80 subunit Spc25|Kegg: tva:TVAG_387410 3e-06 viral A-type inclusion protein, putative [EC:2.7.7.7]; K02331 DNA polymerase phi subunit				gi|123416438|ref|XP_001304893.1|/8.53253e06/viral Atype inclusion protein [Trichomonas vaginalis G3]
MergeConsencus49299	0.646354	3.03987	0	6.39456	3.63569	6.57137	0.0157363	4.50369	Swissprot: Q2KMM2 2e-11 TPPC1_RAT Trafficking protein particle complex subunit 1 OS=Rattus norvegicus GN=Trappc1 PE=2 SV=1|Nr: ref|XP_001955549.1| 1e-14 GF18826 [Drosophila ananassae] gb|EDV44110.1| GF18826 [Drosophila ananassae]	GO:0005801//cisGolgi network		GO:0048193//Golgi vesicle transport	gi|194746154|ref|XP_001955549.1|/5.86654e15/GF18826 [Drosophila ananassae]
MergeConsencus11379	1.026	0.775511	0	2.79658	2.14359	3.14591	0.00397905	4.48849	Swissprot: Q9UGB7 1e-26 MIOX_HUMAN Inositol oxygenase OS=Homo sapiens GN=MIOX PE=1 SV=1|Nr: ref|XP_966469.1| 4e-41 PREDICTED: similar to myoinositol oxygenase [Tribolium castaneum]|IPR: IPR007828; Protein of unknown function DUF706|Kegg: spu:593425 4e-27 LOC593425; similar to myo-inositol oxygenase [EC:1.13.99.1]; K00469 inositol oxygenase	GO:0044424//intracellular part	GO:0046914//transition metal ion binding;GO:0016701//oxidoreductase activity, acting on single donors with incorporation of molecular oxygen	GO:0006020//inositol metabolic process	gi|91084833|ref|XP_966469.1|/1.66352e41/PREDICTED: similar to myoinositol oxygenase [Tribolium castaneum]
Contig5389	75.3772	86.84	23.7299	298.549	277.304	256.822	0.000351572	4.47802	Swissprot: O60356 6e-07 NUPR1_HUMAN Nuclear protein 1 OS=Homo sapiens GN=NUPR1 PE=1 SV=1|Nr: ref|XP_001604482.1| 6e-25 PREDICTED: similar to CG6770-PA [Nasonia vitripennis]|Nt: gb|EF638984.1| 7e-14 Triatoma infestans clone TI-310 DNA-binding nuclear protein p8 mRNA, complete cds
MergeConsencus53614	0.32064	1.38234	0.330478	3.62535	2.64525	2.77695	0.00373792	4.44934	Swissprot: O43913 5e-80 ORC5_HUMAN Origin recognition complex subunit 5 OS=Homo sapiens GN=ORC5L PE=1 SV=1|Nr: ref|XP_002204005.1| 4e-84 hypothetical protein BRAFLDRAFT_260887 [Branchiostoma floridae] gb|EEA76664.1| hypothetical protein BRAFLDRAFT_260887 [Branchiostoma floridae]|Kegg: spu:589513 2e-83 LOC589513; hypothetical LOC589513; K02607 origin recognition complex subunit 5	GO:0043234//protein complex;GO:0031981//nuclear lumen	GO:0005515//protein binding	GO:0006259//DNA metabolic process	gi|260804781|ref|XP_002597266.1|/1.62633e79/hypothetical protein BRAFLDRAFT_260887 [Branchiostoma floridae]
MergeConsencus9949	1.22451	1.00782	0.662591	5.71107	4.27041	2.76652	0.00960181	4.40358	Swissprot: Q10173 3e-15 NUF2_SCHPO Kinetochore protein nuf2 OS=Schizosaccharomyces pombe GN=nuf2 PE=1 SV=1|Nr: ref|YP_002379624.1| 7e-19 BRCT domain protein [Cyanothece sp. PCC 7424] gb|ACK72756.1| BRCT domain protein [Cyanothece sp. PCC 7424]|Cog: aq_1006 3e-13 --|Kegg: ehi:22.t00027 5e-13 villin-related protein; K08017 advillin	GO:0044464//cell part			gi|123455564|ref|XP_001315525.1|/1.5528e09/viral Atype inclusion protein [Trichomonas vaginalis G3]
MergeConsencus17887	0	0.987256	0.324534	1.4834	2.59767	1.65991	0.0154079	4.37645	Swissprot: Q96BD8 2e-19 SKA1_HUMAN Spindle and kinetochore-associated protein 1 OS=Homo sapiens GN=SKA1 PE=1 SV=1|Nr: ref|NP_001099604.1| 7e-19 hypothetical protein LOC291441 [Rattus norvegicus] gb|EDL82905.1| similar to RIKEN cDNA 2810433K01 (predicted), isoform CRA_b [Rattus norvegicus] gb|EDL82907.1| similar to RIKEN cDNA 2810433K01 (predicted), isoform CRA_b [Rattus norvegicus] gb|EDL82908.1|…	GO:0005819//spindle;GO:0000777//condensed chromosome kinetochore	GO:0005515//protein binding	GO:0007067//mitosis	gi|157817406|ref|NP_001099604.1|/2.95999e19/spindle and kinetochoreassociated protein 1 [Rattus norvegicus]
Contig4292	3.36013	14.6743	0.927649	33.9211	27.5407	21.4189	0.00931849	4.37088	Nt: gb|U41373.1|LMU41373 4e-31 Locusta migratoria juvenile hormone-regulated gene, partial cds
MergeConsencus46732	0.241943	1.19478	0.187024	2.59877	2.12302	2.35046	0.00344664	4.35552	Swissprot: Q6GDE9 1e-08 SRAP_STAAR Serine-rich adhesin for platelets OS=Staphylococcus aureus (strain MRSA252) GN=sasA PE=3 SV=1|Nr: ref|XP_002133407.1| 6e-09 GA22881 [Drosophila pseudoobscura pseudoobscura] gb|EDY72035.1| GA22881 [Drosophila pseudoobscura pseudoobscura]|Kegg: mxa:MXAN_4557 6e-06 serine/threonine kinase family protein [EC:2.7.1.-]; K00924				gi|157128443|ref|XP_001655124.1|/4.99049e08/hypothetical protein AaeL_AAEL011125 [Aedes aegypti]
MergeConsencus18962	190.133	129.349	203.134	1104.22	499.716	670.612	0.0161364	4.35223	IPR: IPR000568; ATPase, F0 complex, subunit A|GO: GO:0015992; proton transport; Biological Process
MergeConsencus9106	18.435	41.6306	51.3468	192.308	152.087	137.511	0.00146601	4.32542	Nr: ref|XP_001600285.1| 7e-10 PREDICTED: hypothetical protein [Nasonia vitripennis]				gi|289742501|gb|ADD19998.1|/1.39814e10/hypothetical conserved protein [Glossina morsitans morsitans]
MergeConsencus28849	5.529	3.05924	0.502821	6.89495	15.1842	16.9005	0.02164	4.28769	IPR: IPR016196; MFS general substrate transporter
MergeConsencus16297	16.4152	19.7752	4.47239	59.9016	71.7482	41.3426	0.00578141	4.25432	Swissprot: Q28DT9 4e-58 SPSB3_XENTR SPRY domain-containing SOCS box protein 3 OS=Xenopus tropicalis GN=spsb3 PE=2 SV=1|Nr: ref|XP_001122547.1| 2e-61 PREDICTED: similar to SPRY domain-containing SOCS box protein SSB-3 [Apis mellifera]|IPR: IPR001870; B302, (SPRY)-like				gi|110756832|ref|XP_001122547.1|/9.06698e62/PREDICTED: similar to SPRY domaincontaining SOCS box protein SSB3 [Apis mellifera]
MergeConsencus1341	0.417624	0.596254	0.184473	2.23447	1.20811	1.65119	0.00770683	4.25065	Swissprot: Q8TEM1 0.0 PO210_HUMAN Nuclear pore membrane glycoprotein 210 OS=Homo sapiens GN=NUP210 PE=1 SV=3|Nr: gb|EEB12182.1| 0.0 Nuclear pore membrane glycoprotein 210 precursor, putative [Pediculus humanus corporis]|IPR: IPR008964; Invasin/intimin cell-adhesion|Kegg: cel:Y39B6A.47 1e-08 nhr-145; Nuclear Hormone Receptor family; K08708 nuclear receptor, other families, nematode	GO:0012505//endomembrane system;GO:0005634//nucleus;GO:0044446//intracellular organelle part			gi|242008248|ref|XP_002424920.1|/0/Nuclear pore membrane glycoprotein 210 precursor, putative [Pediculus humanus corporis]
MergeConsencus8057	4.24338	2.66094	0.218679	10.7951	14.3212	5.11308	0.0290407	4.24391	Swissprot: Q502K3 1e-32 ANR52_DANRE Ankyrin repeat domain-containing protein 52 OS=Danio rerio GN=ankrd52 PE=2 SV=1|Nr: ref|ZP_00374082.1| 4e-51 ankyrin 1, erythrocyte splice form 1 [Wolbachia endosymbiont of Drosophila ananassae] gb|EAL58401.1| ankyrin 1, erythrocyte splice form 1 [Wolbachia endosymbiont of Drosophila ananassae]|IPR: IPR002110; Ankyrin|Cog: alr7243_1 4e-24 --|Kegg: dre:553206 3e…
MergeConsencus43677	1.87728	1.76581	1.59627	7.95962	9.08121	4.87752	0.00577953	4.1834	Swissprot: Q9V461 4e-31 MCM6_DROME DNA replication licensing factor Mcm6 OS=Drosophila melanogaster GN=Mcm6 PE=1 SV=1|Nr: ref|XP_001850585.1| 8e-33 DNA replication licensing factor Mcm6 [Culex quinquefasciatus] gb|EDS32330.1| DNA replication licensing factor Mcm6 [Culex quinquefasciatus]|Cog: SPBC211.04c 3e-12 --|Kegg: dme:Dmel_CG4039 9e-31 Mcm6; Minichromosome maintenance 6; K02542 minichromosom…	GO:0043231//intracellular membranebounded organelle	GO:0004386//helicase activity;GO:0043566//structurespecific DNA binding	GO:0006261//DNAdependent DNA replication	gi|119114648|ref|XP_319406.3|/9.86556e22/AGAP010219PA [Anopheles gambiae str. PEST]
MergeConsencus28870	0.907294	2.38456	0.453814	6.33608	5.94403	3.37621	0.0111559	4.17985	Swissprot: Q640S1 9e-86 S39A9_XENTR Zinc transporter ZIP9 OS=Xenopus tropicalis GN=slc39a9 PE=2 SV=1|Nr: ref|XP_001603533.1| 3e-95 PREDICTED: similar to conserved hypothetical protein [Nasonia vitripennis]|IPR: IPR003689; Zinc/iron permease|GO: GO:0016020; membrane; Cellular Component			GO:0006810//transport	gi|242022938|ref|XP_002431894.1|/2.04928e69/conserved hypothetical protein [Pediculus humanus corporis]
MergeConsencus5794	2.38091	4.99896	1.84047	16.1039	13.7751	8.64509	0.00771219	4.17816	Swissprot: P40937 1e-101 RFC5_HUMAN Replication factor C subunit 5 OS=Homo sapiens GN=RFC5 PE=1 SV=1|Nr: ref|NP_001080677.1| 1e-101 replication factor C (activator 1) 5 (36.5 kDa) [Xenopus laevis] gb|AAH44712.1| Rfc5-prov protein [Xenopus laevis]|IPR: IPR008921; DNA polymerase III clamp loader subunit, C-terminal	GO:0031981//nuclear lumen;GO:0005657//replication fork	GO:0003677//DNA binding;GO:0005515//protein binding;GO:0016462//pyrophosphatase activity;GO:0032559//adenyl ribonucleotide binding	GO:0006259//DNA metabolic process;GO:0048856//anatomical structure development	gi|225718872|gb|ACO15282.1|/6.59069e104/Replication factor C subunit 5 [Caligus clemensi]
MergeConsencus14410	4.40335	3.58433	0	11.968	15.6232	5.7395	0.0284549	4.17277	Swissprot: Q8BTI8 4e-07 SRRM2_MOUSE Serine/arginine repetitive matrix protein 2 OS=Mus musculus GN=Srrm2 PE=1 SV=2|Nr: ref|YP_784362.1| 2e-07 hypothetical protein CRV172 [Crocodilepox virus] gb|ABJ09063.1| hypothetical protein CRV172 [Crocodilepox virus]|Cog: DR2133 6e-07 --|Kegg: bmn:BMA10247_A1507 8e-06 2,4-dihydroxyhept-2-ene-1,7-dioic acid aldolase [EC:4.1.2.-]; K01636
MergeConsencus18070	2.22009	3.13239	0.171615	6.90295	6.74342	9.27928	0.00421271	4.15012	Swissprot: Q9VU95 1e-106 AGT2L_DROME Alanine--glyoxylate aminotransferase 2-like OS=Drosophila melanogaster GN=CG8745 PE=1 SV=2|Nr: gb|EEB14170.1| 1e-123 alanine-glyoxylate aminotransferase, putative [Pediculus humanus corporis]|IPR: IPR005814; Aminotransferase class-III	GO:0043231//intracellular membranebounded organelle	GO:0008483//transaminase activity;GO:0048037//cofactor binding	GO:0006527//arginine catabolic process	gi|242012375|ref|XP_002426908.1|/5.30168e124/alanineglyoxylate aminotransferase, putative [Pediculus humanus corporis]
MergeConsencus17567	10.0383	15.6308	3.56528	44.7989	32.4036	43.9287	0.00222848	4.14346	Swissprot: Q4KMC4 0.0 GFPT2_RAT Glucosamine--fructose-6-phosphate aminotransferase [isomerizing] 2 OS=Rattus norvegicus GN=Gfpt2 PE=2 SV=3|Nr: ref|XP_001606155.1| 0.0 PREDICTED: similar to RE72989p [Nasonia vitripennis]|IPR: IPR001347; Sugar isomerase (SIS)|GO: GO:0005529; sugar binding; Molecular Function	GO:0044424//intracellular part	GO:0030246//carbohydrate binding;GO:0008483//transaminase activity	GO:0005975//carbohydrate metabolic process	gi|156550155|ref|XP_001606155.1|/0/PREDICTED: similar to RE72989p [Nasonia vitripennis]
MergeConsencus18271	2.71773	1.22902	2.10084	8.273	8.46666	8.26559	6.63795e-05	4.13475	Swissprot: A4IFH4 7e-55 PSF1_BOVIN DNA replication complex GINS protein PSF1 OS=Bos taurus GN=GINS1 PE=2 SV=1|Nr: ref|XP_002210665.1| 3e-59 hypothetical protein BRAFLDRAFT_120278 [Branchiostoma floridae] gb|EEA69919.1| hypothetical protein BRAFLDRAFT_120278 [Branchiostoma floridae]|IPR: IPR005339; GINS complex, Psf1 component|Cog: SPBP23A10.09 1e-10 --|Kegg: nve:NEMVE_v1g235999 9e-59 NEMVEDRAFT_v…	GO:0043234//protein complex;GO:0043231//intracellular membranebounded organelle	GO:0005488//binding	GO:0006259//DNA metabolic process	gi|291222911|ref|XP_002731436.1|/2.90304e62/PREDICTED: hypothetical protein [Saccoglossus kowalevskii]
MergeConsencus12818	2.37335	5.08862	0	14.7985	10.9941	4.88897	0.0376019	4.11171	Swissprot: Q9D0R2 1e-104 SYTC_MOUSE Threonyl-tRNA synthetase, cytoplasmic OS=Mus musculus GN=Tars PE=1 SV=2|Nr: gb|EEB19847.1| 1e-112 Threonyl-tRNA synthetase, cytoplasmic, putative [Pediculus humanus corporis]|IPR: IPR004095; TGS	GO:0044424//intracellular part	GO:0004812//aminoacyltRNA ligase activity;GO:0032559//adenyl ribonucleotide binding	GO:0006418//tRNA aminoacylation for protein translation	gi|242024338|ref|XP_002432585.1|/9.40783e109/ThreonyltRNA synthetase, cytoplasmic, putative [Pediculus humanus corporis]
MergeConsencus16002	6.16776	11.9936	0	28.3304	18.2807	28.0036	0.0085096	4.10844	Swissprot: P47856 1e-153 GFPT1_MOUSE Glucosamine--fructose-6-phosphate aminotransferase [isomerizing] 1 OS=Mus musculus GN=Gfpt1 PE=2 SV=3|Nr: ref|NP_001128421.1| 0.0 glutamine:fructose-6-phosphate aminotransferase 1 [Apis mellifera]|IPR: IPR000583; Glutamine amidotransferase, class-II	GO:0044424//intracellular part	GO:0030246//carbohydrate binding;GO:0008483//transaminase activity	GO:0005975//carbohydrate metabolic process	gi|201023359|ref|NP_001128421.1|/0/glutamine:fructose6phosphate aminotransferase 1 [Apis mellifera]
MergeConsencus18006	9.90227	20.0871	4.28992	51.5205	44.1924	43.3921	0.00136874	4.05799	Swissprot: Q68FX1 1e-106 MPI_RAT Mannose-6-phosphate isomerase OS=Rattus norvegicus GN=Mpi PE=2 SV=1|Nr: ref|XP_623842.1| 1e-123 PREDICTED: similar to Mannose-6-phosphate isomerase (Phosphomannose isomerase) (PMI) (Phosphohexomutase) [Apis mellifera]|IPR: IPR001250; Mannose-6-phosphate isomerase, type I		GO:0016861//intramolecular oxidoreductase activity, interconverting aldoses and ketoses	GO:0006487//protein amino acid Nlinked glycosylation;GO:0019318//hexose metabolic process	gi|66564896|ref|XP_623842.1|/4.88928e124/PREDICTED: similar to Mannose6phosphate isomerase (Phosphomannose isomerase) (PMI) (Phosphohexomutase) [Apis mellifera]
MergeConsencus9243	24.6656	39.1909	10.346	117.41	123.801	59.5502	0.0133613	4.05324	Swissprot: P70389 5e-29 ALS_MOUSE Insulin-like growth factor-binding protein complex acid labile chain OS=Mus musculus GN=Igfals PE=2 SV=1|Nr: ref|XP_392419.3| 1e-139 PREDICTED: similar to CG32372-PA [Apis mellifera]|IPR: IPR001611; Leucine-rich repeat				gi|110757535|ref|XP_392419.3|/4.37664e139/PREDICTED: similar to CG32372PA [Apis mellifera]
MergeConsencus14935	7.74733	9.10914	0.90739	24.5534	29.3162	18.0339	0.00603125	4.04774	Swissprot: P50053 5e-42 KHK_HUMAN Ketohexokinase OS=Homo sapiens GN=KHK PE=1 SV=1|Nr: ref|NP_001087493.1| 1e-41 MGC81863 protein [Xenopus laevis] gb|AAH80009.1| MGC81863 protein [Xenopus laevis]|Kegg: xla:447317 2e-42 MGC81863; MGC81863 protein [EC:2.7.1.3]; K00846 ketohexokinase	GO:0044424//intracellular part	GO:0005488//binding;GO:0016773//phosphotransferase activity, alcohol group as acceptor	GO:0043434//response to peptide hormone stimulus;GO:0009746;GO:0034285;GO:0010038//response to metal ion;GO:0019318//hexose metabolic process	gi|148231941|ref|NP_001087493.1|/4.66747e42/ketohexokinase (fructokinase) [Xenopus laevis]
MergeConsencus6756	5.15633	9.09404	1.99295	25.9114	12.2461	27.1825	0.0173392	4.02258	Swissprot: Q25641 5e-39 CRPI_PERAM Allergen Cr-PI OS=Periplaneta americana PE=1 SV=1|Nr: gb|AAX14951.1| 6e-57 arylphorin hexamerin-like protein 2 [Romalea microptera]|IPR: IPR000896; Hemocyanin, copper-containing				gi|60256959|gb|AAX14951.1|/2.72185e57/arylphorin hexamerinlike protein 2 [Romalea microptera]
Contig4565	6.28789	10.4524	8.38035	49.3372	28.539	22.5339	0.0188827	3.99712	Swissprot: Q8SPI0 1e-06 APOD_MACFA Apolipoprotein D OS=Macaca fascicularis GN=APOD PE=2 SV=1|Nr: ref|XP_001961861.1| 1e-09 GF14723 [Drosophila ananassae] gb|EDV31082.1| GF14723 [Drosophila ananassae]|Nt: gb|BC062307.1| 4e-16 Homo sapiens cDNA clone IMAGE:3504574, **** WARNING: chimeric clone ****
Contig2838	11.8077	23.9264	4.66084	72.7886	64.7216	23.839	0.0335741	3.9943	Swissprot: P08962 7e-25 CD63_HUMAN CD63 antigen OS=Homo sapiens GN=CD63 PE=1 SV=2|Nr: gb|EEB16799.1| 2e-36 CD63 antigen, putative [Pediculus humanus corporis]|Kegg: nve:NEMVE_v1g241341 2e-33 NEMVEDRAFT_v1g241341; predicted protein; K06497 CD63 antigen
MergeConsencus37452	1.70662	0.40132	0	3.28033	3.60945	1.46518	0.0344199	3.96357	Swissprot: P53782 9e-65 CCND2_XENLA G1/S-specific cyclin-D2 OS=Xenopus laevis GN=ccnd2 PE=2 SV=1|Nr: ref|XP_396634.1| 1e-85 PREDICTED: similar to G1/S-specific cyclin-D3 [Apis mellifera]|IPR: IPR004367; Cyclin, C-terminal	GO:0043234//protein complex	GO:0019900//kinase binding	GO:0000079//regulation of cyclindependent protein kinase activity;GO:0001932//regulation of protein amino acid phosphorylation;GO:0009725//response to hormone stimulus;GO:0032501//multicellular organismal process	gi|226823331|ref|NP_001152805.1|/1.8433e70/cyclin D [Nasonia vitripennis]
MergeConsencus9027	1.20802	3.05924	0.0718316	5.77863	6.69047	4.72373	0.00729869	3.96232	Swissprot: P27049 4e-34 BTG2_RAT Protein BTG2 OS=Rattus norvegicus GN=Btg2 PE=1 SV=1|Nr: ref|XP_001122525.1| 8e-50 PREDICTED: similar to BTG2 protein (NGF-inducible anti-proliferative protein PC3) [Apis mellifera]|IPR: IPR002087; Anti-proliferative protein		GO:0005488//binding	GO:0045767//regulation of antiapoptosis;GO:0003002//regionalization;GO:0009725//response to hormone stimulus;GO:0006259//DNA metabolic process;GO:0009628//response to abiotic stimulus;GO:0033554//cellular response to stress;GO:0008213;GO:0030154//cell dif	gi|110750648|ref|XP_001122525.1|/5.66254e50/PREDICTED: similar to BTG2 protein (NGFinducible antiproliferative protein PC3) [Apis mellifera]
Contig4981	52.7091	31.2909	8.88795	146.252	59.4423	161.991	0.027895	3.95837	Swissprot: Q7M4F2 2e-38 CUD8_SCHGR Endocuticle structural glycoprotein SgAbd-8 OS=Schistocerca gregaria PE=1 SV=1|Nr: ref|XP_974046.1| 2e-37 PREDICTED: similar to cuticular protein 78, RR-1 family (AGAP009876-PA) [Tribolium castaneum]|Nt: dbj|AK283646.1| 2e-10 Gryllus bimaculatus mRNA, GBcontig30507
MergeConsencus29165	9.83703	4.26122	0	13.1712	28.54	14.0367	0.0364539	3.95424	Swissprot: Q4UMH6 3e-11 Y381_RICFE Putative ankyrin repeat protein RF_0381 OS=Rickettsia felis GN=RF_0381 PE=4 SV=1|Nr: ref|ZP_00373467.1| 2e-18 ankyrin repeat domain protein [Wolbachia endosymbiont of Drosophila ananassae] gb|EAL59018.1| ankyrin repeat domain protein [Wolbachia endosymbiont of Drosophila ananassae]|IPR: IPR002110; Ankyrin|Cog: alr7243_1 2e-07 --|Kegg: aga:AgaP_10811 6e-11 AgaP_E…				gi|221135813|ref|XP_002170917.1|/1.70477e16/PREDICTED: similar to ankyrin 2,3/unc44, partial [Hydra magnipapillata]
MergeConsencus28191	2.28529	1.3435	0	5.65226	5.4632	3.22696	0.0125462	3.9524	Swissprot: Q27367 2e-34 CRQ_DROME Protein croquemort OS=Drosophila melanogaster GN=crq PE=1 SV=2|Nr: gb|EEB18365.1| 7e-35 protein croquemort, putative [Pediculus humanus corporis]|IPR: IPR002159; CD36 antigen|GO: GO:0007155; cell adhesion; Biological Process	GO:0016020//membrane	GO:0004888//transmembrane receptor activity	GO:0050896//response to stimulus;GO:0006909//phagocytosis;GO:0002252;GO:0048102//autophagic cell death;GO:0030100//regulation of endocytosis;GO:0002274	gi|242021341|ref|XP_002431103.1|/2.9545e35/protein croquemort, putative [Pediculus humanus corporis]
MergeConsencus707	1.23315	2.08031	0.165781	5.15277	4.67453	3.90654	0.00334532	3.94736	Swissprot: Q6ZUT9 0.0 RA61L_HUMAN RAB6IP1-like protein OS=Homo sapiens PE=1 SV=2|Nr: ref|XP_395592.3| 0.0 PREDICTED: similar to CG7852-PA, isoform A [Apis mellifera]|IPR: IPR001024; Lipoxygenase, LH2				gi|110758708|ref|XP_395592.3|/0/PREDICTED: similar to CG7852PA, isoform A [Apis mellifera]
MergeConsencus4701	1.12019	0.614644	0.0577279	2.00538	2.01631	3.037	0.00938846	3.93777	Swissprot: Q9VDD7 8e-65 S35B1_DROME Solute carrier family 35 member B1 homolog OS=Drosophila melanogaster GN=CG5802 PE=1 SV=1|Nr: ref|XP_001950126.1| 1e-104 PREDICTED: similar to solute carrier family 35 member B1 [Acyrthosiphon pisum]|IPR: IPR013657; UAA transporter|Cog: YPL244c 2e-20 --	GO:0042598//vesicular fraction;GO:0016020//membrane	GO:0015165//pyrimidine nucleotide sugar transmembrane transporter activity	GO:0006810//transport	gi|193664424|ref|XP_001950126.1|/2.44538e94/PREDICTED: similar to solute carrier family 35 member B1 [Acyrthosiphon pisum]
MergeConsencus15112	0.549825	1.09619	0.0184792	2.63532	1.64049	2.26839	0.00937663	3.93164	Swissprot: Q9GLE4 3e-67 MMP14_BOVIN Matrix metalloproteinase-14 OS=Bos taurus GN=MMP14 PE=2 SV=1|Nr: ref|NP_001116499.1| 1e-153 matrix metalloproteinase 1 isoform 1 [Bombyx mori] gb|ACA64804.1| matrix metalloproteinase variant 1 [Bombyx mori]|IPR: IPR000585; Hemopexin	GO:0043005//neuron projection	GO:0004175//endopeptidase activity;GO:0046872//metal ion binding	GO:0035151//regulation of tube size, open tracheal system;GO:0022617//extracellular matrix disassembly;GO:0002164//larval development;GO:0060560//developmental growth involved in morphogenesis;GO:0008152//metabolic process;GO:0048102//autophagic cell deat	gi|172356113|ref|NP_001116499.1|/1.1115e142/matrix metalloproteinase 1 isoform 1 [Bombyx mori]
MergeConsencus2440	4.47202	7.34321	12.1588	32.038	34.8697	27.001	0.000958112	3.9171	Swissprot: P30536 7e-15 TSPO_HUMAN Translocator protein OS=Homo sapiens GN=TSPO PE=1 SV=2|Nr: ref|XP_002052849.1| 1e-23 GJ17784 [Drosophila virilis] gb|EDW65004.1| GJ17784 [Drosophila virilis]|Cog: SMa1079 1e-08 --|Kegg: dme:Dmel_CG2789 3e-23 CG2789; CG2789; K05770 benzodiazapine receptor	GO:0044464//cell part			gi|195388362|ref|XP_002052849.1|/5.06319e24/GJ17784 [Drosophila virilis]
MergeConsencus277	15.7736	18.0707	30.014	94.8891	72.3453	82.2397	0.000709668	3.90669	Swissprot: A7EKZ0 2e-06 PAN1_SCLS1 Actin cytoskeleton-regulatory complex protein pan1 OS=Sclerotinia sclerotiorum (strain ATCC 18683 / 1980 / Ss-1) GN=pan1 PE=3 SV=1
MergeConsencus16428	0.546848	0.964458	0.84544	3.86437	3.07598	2.16211	0.00569982	3.8623	Swissprot: Q9Y3C1 6e-29 U384_HUMAN UPF0384 protein CGI-117 OS=Homo sapiens GN=CGI-117 PE=1 SV=2|Nr: ref|XP_967613.2| 4e-45 PREDICTED: similar to CG11563 CG11563-PA [Tribolium castaneum]				gi|189235480|ref|XP_967613.2|/2.22712e36/PREDICTED: similar to CG11563 CG11563PA [Tribolium castaneum]
MergeConsencus23450	0.858473	1.938	0	4.07669	3.97897	2.71536	0.0101052	3.85165	Swissprot: Q96PU4 1e-126 UHRF2_HUMAN E3 ubiquitin-protein ligase UHRF2 OS=Homo sapiens GN=UHRF2 PE=1 SV=1|Nr: ref|XP_001944935.1| 1e-128 PREDICTED: similar to predicted protein [Acyrthosiphon pisum]|IPR: IPR000626; Ubiquitin				gi|291242193|ref|XP_002740994.1|/1.1053e141/PREDICTED: ubiquitinlike with PHD and ring finger domains 1like [Saccoglossus kowalevskii]
MergeConsencus38243	4.8859	9.95069	1.95587	23.4289	18.0601	22.9644	0.00269805	3.83824	Swissprot: O35114 5e-54 SCRB2_MOUSE Lysosome membrane protein 2 OS=Mus musculus GN=Scarb2 PE=1 SV=3|Nr: ref|XP_001660152.1| 9e-79 epithelial membrane protein [Aedes aegypti] gb|EAT48770.1| epithelial membrane protein [Aedes aegypti]|IPR: IPR002159; CD36 antigen|GO: GO:0007155; cell adhesion; Biological Process			GO:0048102//autophagic cell death	gi|157123396|ref|XP_001660152.1|/2.71311e74/epithelial membrane protein [Aedes aegypti]
MergeConsencus12702	2.99963	3.20628	0.210796	12.333	7.36264	4.92877	0.0317689	3.83754	Swissprot: P29747 8e-08 CREBA_DROME Cyclic AMP response element-binding protein A OS=Drosophila melanogaster GN=CrebA PE=1 SV=2|Nr: ref|XP_002007746.1| 2e-07 GI13117 [Drosophila mojavensis] gb|EDW18222.1| GI13117 [Drosophila mojavensis]	GO:0043231//intracellular membranebounded organelle	GO:0030528//transcription regulator activity;GO:0005488//binding	GO:0003002//regionalization;GO:0006355//regulation of transcription, DNAdependent;GO:0008363//larval chitinbased cuticle development;GO:0035272//exocrine system development	gi|195126575|ref|XP_002007746.1|/7.43909e08/GI13117 [Drosophila mojavensis]
MergeConsencus3457	2.53216	3.06886	0.511932	9.46997	8.19532	5.72089	0.0064691	3.82567	Swissprot: P98088 5e-10 MUC5A_HUMAN Mucin-5AC (Fragments) OS=Homo sapiens GN=MUC5AC PE=1 SV=3|Nr: gb|EEB15202.1| 7e-98 hypothetical protein Phum_PHUM354830 [Pediculus humanus corporis]|IPR: IPR002893; Zinc finger, MYND-type|GO: GO:0008270; zinc ion binding; Molecular Function|Cog: SMc01032 8e-06 --|Kegg: sce:YIR019C 1e-06 MUC1, STA4, FLO11; GPI-anchored cell surface glycoprotein (flocculin) requi…		GO:0046914//transition metal ion binding		gi|242014529|ref|XP_002427940.1|/6.40855e69/hypothetical protein Phum_PHUM354830 [Pediculus humanus corporis]
MergeConsencus10883	11.8426	8.81285	0.811157	14.9366	31.7049	35.4771	0.0234349	3.8254	Swissprot: Q10168 8e-11 NSP1_SCHPO Nucleoporin nsp1 OS=Schizosaccharomyces pombe GN=nsp1 PE=1 SV=1|Nr: gb|EDK37104.2| 1e-11 hypothetical protein PGUG_01202 [Pichia guilliermondii ATCC 6260]|Kegg: bta:281333 4e-10 MUC1; mucin 1, cell surface associated; K06568 mucin 1, transmembrane				gi|260832486|ref|XP_002611188.1|/1.69353e06/hypothetical protein BRAFLDRAFT_88413 [Branchiostoma floridae]
MergeConsencus15359	0.874579	2.92673	0.260023	7.79672	4.23829	3.49588	0.0347766	3.82409	Swissprot: Q06003 1e-58 GOLI_DROME Protein goliath OS=Drosophila melanogaster GN=gol PE=2 SV=3|Nr: ref|XP_966546.1| 8e-85 PREDICTED: similar to goliath E3 ubiquitin ligase [Tribolium castaneum]|IPR: IPR001841; Zinc finger, RING-type		GO:0046872//metal ion binding		gi|91081613|ref|XP_966546.1|/1.17477e72/PREDICTED: similar to goliath E3 ubiquitin ligase [Tribolium castaneum]
MergeConsencus10771	1.40584	3.54204	1.86296	11.0699	5.64837	9.30172	0.0102775	3.82038	Swissprot: P17078 2e-37 RL35_RAT 60S ribosomal protein L35 OS=Rattus norvegicus GN=Rpl35 PE=1 SV=3|Nr: gb|ABM55466.1| 1e-45 ribosomal protein L35 [Xenopsylla cheopis]|Cog: SPCC613.05c 3e-22 --|Kegg: dpo:Dpse_GA17966 2e-41 GA17966-PA; K02918 large subunit ribosomal protein L35e	GO:0015934//large ribosomal subunit	GO:0005198//structural molecule activity	GO:0007052//mitotic spindle organization	gi|121512030|gb|ABM55466.1|/2.25564e34/ribosomal protein L35 [Xenopsylla cheopis]
MergeConsencus8614	9.49307	5.40827	0	9.68223	21.249	25.9804	0.0328387	3.81923	Swissprot: P04280 2e-25 PRP1_HUMAN Basic salivary proline-rich protein 1 OS=Homo sapiens GN=PRB1 PE=1 SV=2|Nr: ref|XP_001000524.2| 6e-26 PREDICTED: hypothetical protein [Mus musculus]|Cog: BH0696 3e-08 --|Kegg: rno:361662 1e-15 Bub3; budding uninhibited by benzimidazoles 3 homolog (S. cerevisiae); K02180 cell cycle arrest protein BUB3				gi|293357547|ref|XP_002729163.1|/7.97315e30/PREDICTED: hypothetical protein [Rattus norvegicus]
MergeConsencus22921	1.24289	1.46136	0	4.68428	3.26254	2.34004	0.0184067	3.80396	Nr: gb|AAT40504.2| 3e-08 Polyprotein, putative [Solanum demissum]				gi|298204347|gb|ADI61822.1|/2.3952e08/endonucleasereverse transcriptase [Bombyx mori]
MergeConsencus20159	1.35429	2.17899	0.247945	6.09473	4.12963	4.14674	0.00737706	3.80065	Swissprot: P29747 1e-54 CREBA_DROME Cyclic AMP response element-binding protein A OS=Drosophila melanogaster GN=CrebA PE=1 SV=2|Nr: ref|XP_001844814.1| 2e-60 conserved hypothetical protein [Culex quinquefasciatus] gb|EDS38442.1| conserved hypothetical protein [Culex quinquefasciatus]|IPR: IPR001630; cAMP response element binding (CREB) protein	GO:0043231//intracellular membranebounded organelle	GO:0030528//transcription regulator activity;GO:0042802//identical protein binding;GO:0001071;GO:0003677//DNA binding	GO:0003002//regionalization;GO:0006355//regulation of transcription, DNAdependent;GO:0007431//salivary gland development;GO:0008363//larval chitinbased cuticle development	gi|242011695|ref|XP_002426582.1|/3.82719e46/Cyclic AMPdependent transcription factor ATF6 beta, putative [Pediculus humanus corporis]
MergeConsencus11239	0.385737	0.907082	0.745448	3.81621	2.16974	1.74299	0.0217148	3.79191	Swissprot: Q9H0J9 9e-13 PAR12_HUMAN Poly [ADP-ribose] polymerase 12 OS=Homo sapiens GN=PARP12 PE=1 SV=1|Nr: ref|XP_970978.1| 2e-20 PREDICTED: similar to zinc finger CCCH-type domain containing 1 [Tribolium castaneum]|IPR: IPR012317; Poly(ADP-ribose) polymerase, catalytic region|GO: GO:0003950; NAD+ ADP-ribosyltransferase activity; Molecular Function				gi|91087561|ref|XP_970978.1|/1.66644e20/PREDICTED: similar to zinc finger CCCHtype domain containing 1 [Tribolium castaneum]
MergeConsencus14822	5.27877	9.54871	0.627777	23.5297	18.044	16.972	0.00594366	3.78808	Swissprot: Q7ZUY3 2e-61 H2AX_DANRE Histone H2A.x OS=Danio rerio GN=h2afx PE=2 SV=3|Nr: ref|XP_967411.1| 2e-64 PREDICTED: similar to H2A histone family, member X [Tribolium castaneum]|Cog: SPCC622.08c 3e-49 --	GO:0043231//intracellular membranebounded organelle;GO:0000785//chromatin	GO:0003676//nucleic acid binding	GO:0006259//DNA metabolic process;GO:0033554//cellular response to stress;GO:0022403;GO:0034728	gi|91079680|ref|XP_967411.1|/2.89973e49/PREDICTED: similar to H2A histone family, member X [Tribolium castaneum]
MergeConsencus17449	3.03714	12.2753	1.17387	16.0968	21.5682	24.4452	0.0113078	3.76737	Swissprot: P30536 6e-25 TSPO_HUMAN Translocator protein OS=Homo sapiens GN=TSPO PE=1 SV=2|Nr: ref|XP_001942853.1| 2e-35 PREDICTED: similar to predicted protein [Acyrthosiphon pisum]|IPR: IPR004307; TspO/MBR-related protein|GO: GO:0016021; integral to membrane; Cellular Component|Cog: SMa1079 4e-16 --|Kegg: dpo:Dpse_GA15462 2e-33 GA15462-PA; K05770 benzodiazapine receptor	GO:0044464//cell part			gi|240848755|ref|NP_001155576.1|/9.03269e36/hypothetical protein LOC100163461 [Acyrthosiphon pisum]
MergeConsencus20894	0	0.911385	2.69634	6.5731	4.36007	2.62688	0.0376974	3.75861	IPR: IPR001506; Peptidase M12A, astacin|GO: GO:0006508; proteolysis; Biological Process
MergeConsencus25237	3.77601	5.8524	0.265354	15.525	9.07518	12.4089	0.0108698	3.74065	Swissprot: Q9UGB7 2e-26 MIOX_HUMAN Inositol oxygenase OS=Homo sapiens GN=MIOX PE=1 SV=1|Nr: ref|XP_966469.1| 2e-40 PREDICTED: similar to myoinositol oxygenase [Tribolium castaneum]|IPR: IPR007828; Protein of unknown function DUF706|Kegg: spu:593425 1e-27 LOC593425; similar to myo-inositol oxygenase [EC:1.13.99.1]; K00469 inositol oxygenase	GO:0044424//intracellular part	GO:0046914//transition metal ion binding;GO:0016701//oxidoreductase activity, acting on single donors with incorporation of molecular oxygen	GO:0006020//inositol metabolic process	gi|91084833|ref|XP_966469.1|/6.33136e41/PREDICTED: similar to myoinositol oxygenase [Tribolium castaneum]
MergeConsencus8616	2.48616	1.57402	0	3.10832	4.84078	7.23725	0.0285214	3.74032	Swissprot: P04280 3e-32 PRP1_HUMAN Basic salivary proline-rich protein 1 OS=Homo sapiens GN=PRB1 PE=1 SV=2|Nr: ref|NP_493042.2| 2e-36 hypothetical protein Y53C10A.10 [Caenorhabditis elegans] emb|CAA22144.3| C. elegans protein Y53C10A.10, partially confirmed by transcript evidence [Caenorhabditis elegans]|IPR: IPR016024; Armadillo-type fold|GO: GO:0005488; binding; Molecular Function|Cog: YPL089c …				gi|293357547|ref|XP_002729163.1|/5.47571e42/PREDICTED: hypothetical protein [Rattus norvegicus]
MergeConsencus15941	1.74916	1.89842	0.312027	5.89508	3.33008	5.47181	0.00953356	3.71173	Swissprot: Q9VLU5 1e-128 WWOX_DROME WW domain-containing oxidoreductase OS=Drosophila melanogaster GN=Wwox PE=2 SV=1|Nr: ref|XP_969348.1| 1e-147 PREDICTED: similar to WW domain-containing oxidoreductase [Tribolium castaneum]|IPR: IPR001202; WW/Rsp5/WWP	GO:0043231//intracellular membranebounded organelle	GO:0005488//binding;GO:0003824//catalytic activity	GO:0009887//organ morphogenesis;GO:0012502//induction of programmed cell death;GO:0001503//ossification;GO:0010212//response to ionizing radiation	gi|91088307|ref|XP_969348.1|/2.00735e129/PREDICTED: similar to WW domaincontaining oxidoreductase [Tribolium castaneum]
MergeConsencus33088	2.29308	1.92582	0	6.01876	2.39542	7.21603	0.0389833	3.7048	Swissprot: O96006 1e-24 ZBED1_HUMAN Zinc finger BED domain-containing protein 1 OS=Homo sapiens GN=ZBED1 PE=1 SV=1|Nr: ref|XP_002136228.1| 2e-43 GA25633 [Drosophila pseudoobscura pseudoobscura] gb|EDY71248.1| GA25633 [Drosophila pseudoobscura pseudoobscura]|IPR: IPR008906; HAT dimerisation|GO: GO:0046983; protein dimerization activity; Molecular Function				gi|198457727|ref|XP_002136228.1|/4.69898e42/GA25633 [Drosophila pseudoobscura pseudoobscura]
MergeConsencus9157	61.8497	49.6952	6.67123	195.313	117.004	124.988	0.0119307	3.6992	Swissprot: Q64676 6e-68 CGT_MOUSE 2-hydroxyacylsphingosine 1-beta-galactosyltransferase OS=Mus musculus GN=Ugt8 PE=2 SV=2|Nr: ref|XP_967924.1| 1e-116 PREDICTED: similar to glucosyl/glucuronosyl transferases [Tribolium castaneum]|IPR: IPR002213; UDP-glucuronosyl/UDP-glucosyltransferase|GO: GO:0008152; metabolic process; Biological Process				gi|118778599|ref|XP_308743.3|/1.59811e111/AGAP007029PA [Anopheles gambiae str. PEST]
MergeConsencus8548	12.6965	27.5199	3.28573	55.6273	40.0555	65.2274	0.00918277	3.6989	Swissprot: Q09225 9e-29 NRF6_CAEEL Nose resistant to fluoxetine protein 6 OS=Caenorhabditis elegans GN=nrf-6 PE=1 SV=3|Nr: ref|XP_968520.1| 6e-78 PREDICTED: similar to CG3106 CG3106-PA [Tribolium castaneum]|Cog: Cgl1939 6e-08 --|Kegg: sce:YIR019C 6e-11 MUC1, STA4, FLO11; GPI-anchored cell surface glycoprotein (flocculin) required for pseudohyphal formation, invasive growth, flocculation, and biof…				gi|91081649|ref|XP_968520.1|/8.09384e68/PREDICTED: similar to CG3106 CG3106PA [Tribolium castaneum]
MergeConsencus7049	14.7318	26.1288	0.193015	67.0502	38.2023	46.2584	0.016034	3.69056	Swissprot: Q0RDS4 3e-15 IF2_FRAAA Translation initiation factor IF-2 OS=Frankia alni (strain ACN14a) GN=infB PE=3 SV=1|Nr: ref|XP_001865574.1| 7e-29 retinol-binding protein [Culex quinquefasciatus] gb|EDS41902.1| retinol-binding protein [Culex quinquefasciatus]|IPR: IPR016181; Acyl-CoA N-acyltransferase|Cog: DR2133 1e-07 --|Kegg: fal:FRAAL5760 6e-15 infB; translation initiation factor IF-2; K0251…				gi|170059923|ref|XP_001865574.1|/3.08636e29/retinolbinding protein [Culex quinquefasciatus]
MergeConsencus2946	0.16619	0.977014	0.385401	1.87905	2.4305	1.31415	0.0138125	3.67898	Nr: ref|XP_001600645.1| 7e-09 PREDICTED: similar to gag-pol polyprotein [Nasonia vitripennis]				gi|270016307|gb|EFA12753.1|/4.42412e10/hypothetical protein TcasGA2_TC010280 [Tribolium castaneum]
MergeConsencus17798	22.3286	20.0355	14.0807	78.7278	61.3441	66.7757	0.000458545	3.6646	Swissprot: Q8BTI8 1e-10 SRRM2_MOUSE Serine/arginine repetitive matrix protein 2 OS=Mus musculus GN=Srrm2 PE=1 SV=2|Nr: ref|XP_001568167.1| 4e-16 proteophosphoglycan ppg4 [Leishmania braziliensis MHOM/BR/75/M2904] emb|CAM43271.1| proteophosphoglycan ppg4 [Leishmania braziliensis]|Cog: XF1267 1e-08 --|Kegg: bpm:BURPS1710b_A1152 2e-14 carbamoyl-phosphate synthase L chain, ATP binding domain protein …
MergeConsencus20876	1.23599	1.81657	0	3.49372	3.64999	4.01418	0.00417855	3.65526	Swissprot: Q9C0K1 6e-50 S39A8_HUMAN Zinc transporter ZIP8 OS=Homo sapiens GN=SLC39A8 PE=2 SV=1|Nr: ref|NP_071437.3| 9e-49 solute carrier family 39 (zinc transporter), member 8 [Homo sapiens] ref|NP_001128618.1| solute carrier family 39 (zinc transporter), member 8 isoform a [Homo sapiens] ref|XP_001168383.1| PREDICTED: hypothetical protein isoform 3 [Pan troglodytes] ref|XP_001168404.1| PREDICTED…	GO:0044464//cell part		GO:0006812//cation transport	gi|291401369|ref|XP_002717265.1|/1.52935e43/PREDICTED: solute carrier family 39 (zinc transporter), member 8 [Oryctolagus cuniculus]
Contig5098	1.21432	0.571106	0.187736	1.71622	3.00539	2.46915	0.0110755	3.64429	Swissprot: P81926 6e-44 SODC_HALRO Superoxide dismutase [Cu-Zn] OS=Halocynthia roretzi PE=1 SV=2|Nr: ref|XP_001951364.1| 8e-48 PREDICTED: similar to superoxide dismutase (AGAP005234-PA) [Acyrthosiphon pisum]|Nt: gb|AF004949.1|AF004949 2e-08 Dirofilaria immitis cytosolic Cu-Zn superoxide dismutase mRNA, complete cds|Cog: YJR104c 1e-34 --|Kegg: osa:4332846 3e-42 Os03g0351500; hypothetical protein […
MergeConsencus9782	1.17709	3.1555	0.291168	7.38641	2.75434	6.64845	0.0359347	3.63108	Nr: gb|AAX14951.1| 1e-10 arylphorin hexamerin-like protein 2 [Romalea microptera]				gi|60256959|gb|AAX14951.1|/2.41748e10/arylphorin hexamerinlike protein 2 [Romalea microptera]
MergeConsencus51057	2.20809	1.58658	0.379305	5.02786	4.41611	5.54301	0.0022823	3.59059	Swissprot: Q7M4F3 5e-07 CUD2_SCHGR Endocuticle structural glycoprotein SgAbd-2 OS=Schistocerca gregaria PE=1 SV=1|Nr: sp|Q7M4F3|CUD2_SCHGR 8e-06 RecName: Full=Endocuticle structural glycoprotein SgAbd-2
MergeConsencus11641	4.76226	9.33226	2.78141	16.7518	22.7395	20.9209	0.00262383	3.57978	IPR: IPR001412; Aminoacyl-tRNA synthetase, class I, conserved site|GO: GO:0000166; nucleotide binding; Molecular Function
MergeConsencus14469	0.848822	0.665351	0.0273395	1.94945	2.22813	1.31845	0.0114215	3.56535	Swissprot: Q04656 0.0 ATP7A_HUMAN Copper-transporting ATPase 1 OS=Homo sapiens GN=ATP7A PE=1 SV=2|Nr: ref|XP_395837.2| 0.0 PREDICTED: similar to ATP7 CG1886-PA [Apis mellifera]|IPR: IPR000695; H+ transporting ATPase, proton pump		GO:0005488//binding;GO:0016820//hydrolase activity, acting on acid anhydrides, catalyzing transmembrane movement of substances;GO:0015075//ion transmembrane transporter activity		gi|66553575|ref|XP_395837.2|/0/PREDICTED: similar to ATP7 CG1886PA [Apis mellifera]
MergeConsencus3682	35.9532	20.0673	15.5723	76.1216	64.8409	114.1	0.0096249	3.56268	Swissprot: Q9VBV3 5e-16 TAKT_DROME Protein takeout OS=Drosophila melanogaster GN=to PE=2 SV=1|Nr: gb|EEB18806.1| 9e-84 Circadian clock-controlled protein precursor, putative [Pediculus humanus corporis]|IPR: IPR004272; Odorant binding protein				gi|242022231|ref|XP_002431544.1|/3.58976e84/Circadian clockcontrolled protein precursor, putative [Pediculus humanus corporis]
MergeConsencus5747	12.2753	19.4445	5.27165	49.3966	42.3877	39.0966	0.00178157	3.53813	Swissprot: P45352 1e-127 TYSY_RAT Thymidylate synthase OS=Rattus norvegicus GN=Tyms PE=1 SV=1|Nr: ref|XP_970584.2| 1e-126 PREDICTED: similar to bifunctional dihydrofolate reductase-thymidylate synthase [Tribolium castaneum]|IPR: IPR000398; Thymidylate synthase, C-terminal|GO: GO:0004799; thymidylate synthase activity; Molecular Function	GO:0000267//cell fraction	GO:0016597//amino acid binding;GO:0042083//5,10methylenetetrahydrofolatedependent methyltransferase activity	GO:0019087//transformation of host cell by virus;GO:0002069;GO:0040007//growth;GO:0017085//response to insecticide;GO:0006259//DNA metabolic process;GO:0009177;GO:0006730//onecarbon metabolic process;GO:0009887//organ morphogenesis;GO:0031960//response to	gi|240129500|gb|ACS44779.1|/4.61825e132/thymidylate synthase [Litopenaeus vannamei]
MergeConsencus27395	2.39031	2.229	0.063715	5.47515	5.00722	6.05219	0.00406525	3.53075	Swissprot: Q9UGB7 5e-50 MIOX_HUMAN Inositol oxygenase OS=Homo sapiens GN=MIOX PE=1 SV=1|Nr: ref|XP_966469.1| 1e-67 PREDICTED: similar to myoinositol oxygenase [Tribolium castaneum]|IPR: IPR007828; Protein of unknown function DUF706|Kegg: mcc:720668 2e-50 MIOX; myo-inositol oxygenase [EC:1.13.99.1]; K00469 inositol oxygenase	GO:0044424//intracellular part	GO:0046914//transition metal ion binding;GO:0016701//oxidoreductase activity, acting on single donors with incorporation of molecular oxygen	GO:0006020//inositol metabolic process	gi|91084833|ref|XP_966469.1|/4.06018e68/PREDICTED: similar to myoinositol oxygenase [Tribolium castaneum]
MergeConsencus54892	3.78237	2.05256	0	8.22418	7.20095	4.93008	0.0148741	3.48851	Nr: ref|XP_975811.1| 3e-07 PREDICTED: similar to GA21085-PA isoform 2 [Tribolium castaneum]|Kegg: dpo:Dpse_GA21085 6e-07 GA21085-PA [EC:6.-.-.-]; K10105 lipoyltransferase 1				gi|242016690|ref|XP_002428883.1|/4.74134e06/lipoyltransferase 1, putative [Pediculus humanus corporis]
MergeConsencus1508	0.708886	1.94482	0	3.67359	2.69152	2.8695	0.0135312	3.47989	Swissprot: Q9BXK1 2e-42 KLF16_HUMAN Krueppel-like factor 16 OS=Homo sapiens GN=KLF16 PE=1 SV=1|Nr: ref|XP_974369.1| 2e-60 PREDICTED: similar to Kruppel-like factor 13 like [Tribolium castaneum]|Cog: SPAC144.09c 2e-15 --|Kegg: hsa:83855 5e-42 KLF16; Kruppel-like factor 16; K09208 krueppel-like factor 9/13/14/16	GO:0044464//cell part	GO:0030528//transcription regulator activity;GO:0003676//nucleic acid binding;GO:0046914//transition metal ion binding;GO:0001071	GO:0006357//regulation of transcription from RNA polymerase II promoter;GO:0007186//Gprotein coupled receptor protein signaling pathway	gi|91076812|ref|XP_974369.1|/1.12058e60/PREDICTED: similar to Kruppellike factor 13 like [Tribolium castaneum]
MergeConsencus70102	0.795513	0.467673	0.461205	2.8108	1.78988	1.34797	0.0172566	3.44971	Swissprot: Q8CGB3 1e-07 UACA_MOUSE Uveal autoantigen with coiled-coil domains and ankyrin repeats OS=Mus musculus GN=Uaca PE=1 SV=2|Nr: ref|XP_001122673.1| 3e-34 PREDICTED: hypothetical protein [Apis mellifera]|Cog: PH1798 4e-09 --|Kegg: pho:PH1798 3e-08 chromosome assembly protein; K03529 chromosome segregation protein				gi|110751037|ref|XP_001122673.1|/1.39922e30/PREDICTED: hypothetical protein [Apis mellifera]
MergeConsencus24601	0.35632	0.927682	0.27544	2.30216	1.91838	1.15005	0.0163313	3.44391	Swissprot: Q967D7 0.0 TUTL_DROME Protein turtle OS=Drosophila melanogaster GN=tutl PE=2 SV=2|Nr: gb|EEB14757.1| 0.0 turtle protein, isoform, putative [Pediculus humanus corporis]|IPR: IPR003598; Immunoglobulin subtype 2			GO:0008344//adult locomotory behavior;GO:0016198//axon choice point recognition;GO:0010769	gi|242013609|ref|XP_002427495.1|/0/turtle protein, isoform, putative [Pediculus humanus corporis]
MergeConsencus1580	0.746988	1.50564	0.041245	3.61967	2.52105	1.74794	0.0267768	3.43901	Swissprot: Q4R180 5e-45 ORC3_RAT Origin recognition complex subunit 3 OS=Rattus norvegicus GN=Orc3l PE=2 SV=1|Nr: ref|XP_001996767.1| 2e-78 GH24942 [Drosophila grimshawi] gb|EDV95488.1| GH24942 [Drosophila grimshawi]|Kegg: dpo:Dpse_GA17948 2e-46 GA17948-PA; K02605 origin recognition complex subunit 3	GO:0000808//origin recognition complex;GO:0005634//nucleus		GO:0006259//DNA metabolic process;GO:0007612//learning	gi|289546589|gb|ADD10139.1|/6.72687e50/origin recognition complex subunit 3 [Bombyx mori]
MergeConsencus18139	18.1119	20.0958	5.98152	50.5951	47.7344	53.5996	0.000804028	3.43815	Nr: ref|XP_971818.1| 8e-12 PREDICTED: similar to CG14275 CG14275-PA [Tribolium castaneum]				gi|157125600|ref|XP_001660708.1|/2.27391e06/hypothetical protein AaeL_AAEL010263 [Aedes aegypti]
MergeConsencus15340	0.519274	2.03517	1.07041	4.40342	4.86813	3.12851	0.00641441	3.42084	Swissprot: Q9Y1B2 3e-24 ORC6_DROME Origin recognition complex subunit 6 OS=Drosophila melanogaster GN=Orc6 PE=2 SV=2|Nr: ref|NP_477319.1| 5e-23 Origin recognition complex subunit 6 CG1584-PA [Drosophila melanogaster] sp|Q9Y1B2|ORC6_DROME RecName: Full=Origin recognition complex subunit 6 gb|AAF58890.1| CG1584-PA [Drosophila melanogaster] gb|AAL49065.1| RE52740p [Drosophila melanogaster]|IPR: IPR0…	GO:0000808//origin recognition complex		GO:0006259//DNA metabolic process;GO:0034645//cellular macromolecule biosynthetic process;GO:0000087//M phase of mitotic cell cycle	gi|17137482|ref|NP_477319.1|/2.01531e23/origin recognition complex subunit 6 [Drosophila melanogaster]
MergeConsencus17466	3.26361	3.51751	0	8.45634	8.56688	6.14455	0.00836548	3.41651	Swissprot: P17483 8e-08 HXB4_HUMAN Homeobox protein Hox-B4 OS=Homo sapiens GN=HOXB4 PE=1 SV=2|Nr: gb|EEC16865.1| 8e-08 hypothetical protein IscW_ISCW012987 [Ixodes scapularis]|Cog: CC3494_1 9e-06 --|Kegg: ptr:749218 2e-07 HOXB4; homeobox B4; K09304 homeobox protein HoxA/B/C/D4
MergeConsencus25168	0.337935	1.03307	0.208982	2.19702	2.205	0.992542	0.0280703	3.41429	Swissprot: Q56NI9 1e-43 ESCO2_HUMAN N-acetyltransferase ESCO2 OS=Homo sapiens GN=ESCO2 PE=1 SV=1|Nr: ref|XP_001602430.1| 5e-71 PREDICTED: similar to Establishment of cohesion 1 homolog 2 (S. cerevisiae) [Nasonia vitripennis]|Kegg: gga:421067 2e-46 ESCO1, LOC421067; establishment of cohesion 1 homolog 1 (S. cerevisiae) [EC:2.3.1.-]; K00680	GO:0044427//chromosomal part		GO:0006260//DNA replication	gi|156550257|ref|XP_001602430.1|/8.39984e63/PREDICTED: similar to Establishment of cohesion 1 homolog 2 (S. cerevisiae) [Nasonia vitripennis]
MergeConsencus65297	1.28728	2.52258	0	5.45802	3.62042	3.87778	0.0151521	3.40071	Swissprot: Q9D0R2 1e-74 SYTC_MOUSE Threonyl-tRNA synthetase, cytoplasmic OS=Mus musculus GN=Tars PE=1 SV=2|Nr: gb|EEB19847.1| 6e-82 Threonyl-tRNA synthetase, cytoplasmic, putative [Pediculus humanus corporis]|IPR: IPR004095; TGS	GO:0044424//intracellular part	GO:0004812//aminoacyltRNA ligase activity;GO:0032559//adenyl ribonucleotide binding	GO:0006418//tRNA aminoacylation for protein translation	gi|242024338|ref|XP_002432585.1|/2.085e78/ThreonyltRNA synthetase, cytoplasmic, putative [Pediculus humanus corporis]
MergeConsencus10970	6.49403	10.0986	2.91482	25.166	26.1591	14.9086	0.00995613	3.3953	Swissprot: Q9VQY9 4e-56 PSF2_DROME Probable DNA replication complex GINS protein PSF2 OS=Drosophila melanogaster GN=Psf2 PE=1 SV=1|Nr: ref|XP_392289.1| 1e-65 PREDICTED: similar to Probable DNA replication complex GINS protein PSF2 [Apis mellifera]|IPR: IPR007257; GINS complex, Psf2 component|GO: GO:0005634; nucleus; Cellular Component	GO:0043231//intracellular membranebounded organelle;GO:0043234//protein complex	GO:0003678//DNA helicase activity;GO:0030528//transcription regulator activity	GO:0006259//DNA metabolic process;GO:0007090//regulation of S phase of mitotic cell cycle	gi|48095404|ref|XP_392289.1|/5.5334e66/PREDICTED: similar to Probable DNA replication complex GINS protein PSF2 [Apis mellifera]
MergeConsencus52940	0.996871	0.651166	0.0856214	2.50472	1.24607	2.1271	0.0196319	3.39045	Swissprot: P48809 3e-58 RB27C_DROME Heterogeneous nuclear ribonucleoprotein 27C OS=Drosophila melanogaster GN=Hrb27C PE=1 SV=2|Nr: ref|XP_001600266.1| 1e-65 PREDICTED: similar to RNA-binding protein musashi/mRNA cleavage and polyadenylation factor I complex subunit HRP1 [Nasonia vitripennis]|IPR: IPR000504; RNA recognition motif, RNP-1|GO: GO:0003676; nucleic acid binding; Molecular Function|Cog:…	GO:0031981//nuclear lumen;GO:0032991//macromolecular complex	GO:0043566//structurespecific DNA binding;GO:0003729//mRNA binding	GO:0017148//negative regulation of translation;GO:0043484//regulation of RNA splicing;GO:0007297//ovarian follicle cell migration;GO:0044087;GO:0019094//pole plasm mRNA localization;GO:0006935//chemotaxis	gi|156540594|ref|XP_001600266.1|/4.54672e66/PREDICTED: similar to RNAbinding protein musashi/mRNA cleavage and polyadenylation factor I complex subunit HRP1 [Nasonia vitripennis]
MergeConsencus3698	13.7567	12.9811	12.8016	35.7895	50.5684	47.6105	0.00112157	3.38823	Swissprot: Q6DEB1 1e-125 AT2L1_XENLA Alanine--glyoxylate aminotransferase 2-like 1 OS=Xenopus laevis GN=agxt2l1 PE=2 SV=1|Nr: ref|XP_392348.1| 1e-153 PREDICTED: similar to CG8745-PA [Apis mellifera]|IPR: IPR005814; Aminotransferase class-III		GO:0016769//transferase activity, transferring nitrogenous groups;GO:0048037//cofactor binding		gi|48095720|ref|XP_392348.1|/2.91724e153/PREDICTED: similar to CG8745PA [Apis mellifera]
MergeConsencus5971	1.70859	3.43191	0.0550317	7.34501	5.68633	4.50358	0.0161076	3.375	Swissprot: O77245 1e-103 E75_METEN Nuclear hormone receptor E75 OS=Metapenaeus ensis GN=E75 PE=2 SV=1|Nr: emb|CAM97374.1| 1e-142 ecdysone inducible protein 75 [Blattella germanica]|IPR: IPR000536; Nuclear hormone receptor, ligand-binding, core	GO:0043231//intracellular membranebounded organelle	GO:0004879//liganddependent nuclear receptor activity;GO:0001071;GO:0003702//RNA polymerase II transcription factor activity;GO:0005506//iron ion binding;GO:0003677//DNA binding	GO:0006351//transcription, DNAdependent;GO:0010565;GO:0006959//humoral immune response;GO:0010468//regulation of gene expression;GO:0007591//molting cycle, chitinbased cuticle;GO:0035071//salivary gland cell autophagic cell death;GO:0007292//female gamete	gi|187468484|emb|CAM97374.1|/1.07912e136/ecdysone inducible protein 75 [Blattella germanica]
MergeConsencus13748	2.64668	5.24578	1.98746	12.1837	11.6547	9.48197	0.00189273	3.37254	Swissprot: Q5R7A2 1e-119 ALG1_PONAB Chitobiosyldiphosphodolichol beta-mannosyltransferase OS=Pongo abelii GN=ALG1 PE=2 SV=1|Nr: gb|EEB13279.1| 1e-134 Chitobiosyldiphosphodolichol beta-mannosyltransferase, putative [Pediculus humanus corporis]|IPR: IPR001296; Glycosyl transferase, group 1|GO: GO:0009058; biosynthetic process; Biological Process|Cog: SPAC23C4.14 2e-71 --|Kegg: ptr:453895 1e-116 ALG…	GO:0016020//membrane	GO:0000030//mannosyltransferase activity	GO:0008610//lipid biosynthetic process;GO:0006487//protein amino acid Nlinked glycosylation	gi|242010527|ref|XP_002426017.1|/2.1091e134/Chitobiosyldiphosphodolichol betamannosyltransferase, putative [Pediculus humanus corporis]
MergeConsencus3763	2.56791	2.78704	0	7.81695	7.11105	3.12398	0.0344556	3.37108	Swissprot: Q9VVX3 3e-95 FRIZ2_DROME Frizzled-2 OS=Drosophila melanogaster GN=fz2 PE=1 SV=1|Nr: gb|EEB12517.1| 1e-95 class D atypical G-protein coupled receptor GPRfz2, putative [Pediculus humanus corporis]|IPR: IPR000539; Frizzled protein	GO:0005768//endosome;GO:0016023//cytoplasmic membranebounded vesicle;GO:0016020//membrane	GO:0019904//protein domain specific binding;GO:0004888//transmembrane receptor activity	GO:0043062//extracellular structure organization;GO:0007476//imaginal discderived wing morphogenesis;GO:0048588//developmental cell growth;GO:0006897//endocytosis;GO:0007431//salivary gland development;GO:0008406//gonad development;GO:0007166//cell surfac	gi|242008947|ref|XP_002425255.1|/3.69787e90/class D atypical Gprotein coupled receptor GPRfz2, putative [Pediculus humanus corporis]
MergeConsencus13572	1.74998	0.293941	1.54601	5.29992	4.78114	1.97686	0.0333035	3.35882	Swissprot: Q9CQ71 1e-12 RFA3_MOUSE Replication protein A 14 kDa subunit OS=Mus musculus GN=Rpa3 PE=2 SV=1|Nr: gb|EEB17020.1| 4e-12 Replication protein A 14 kDa subunit, putative [Pediculus humanus corporis]|IPR: IPR013970; Replication factor A protein 3	GO:0043234//protein complex;GO:0031981//nuclear lumen	GO:0005488//binding	GO:0006289//nucleotideexcision repair	gi|242018592|ref|XP_002429758.1|/1.53887e12/Replication protein A 14 kDa subunit, putative [Pediculus humanus corporis]
MergeConsencus16316	10.2345	31.7179	2.68596	55.448	33.4749	60.7329	0.0219657	3.35262	Swissprot: Q9GLE4 5e-24 MMP14_BOVIN Matrix metalloproteinase-14 OS=Bos taurus GN=MMP14 PE=2 SV=1|Nr: ref|XP_002048817.1| 5e-69 GJ21109 [Drosophila virilis] gb|EDW60010.1| GJ21109 [Drosophila virilis]|IPR: IPR000585; Hemopexin|GO: GO:0003824; catalytic activity; Molecular Function	GO:0043005//neuron projection;GO:0044421//extracellular region part	GO:0004175//endopeptidase activity;GO:0046914//transition metal ion binding	GO:0035151//regulation of tube size, open tracheal system;GO:0022617//extracellular matrix disassembly;GO:0002164//larval development;GO:0060560//developmental growth involved in morphogenesis;GO:0019538//protein metabolic process;GO:0048102//autophagic c	gi|195380117|ref|XP_002048817.1|/3.78652e69/GJ21109 [Drosophila virilis]
MergeConsencus28693	0.454895	1.06971	0.351639	2.35735	1.87642	2.05548	0.00255739	3.35204	Swissprot: Q94546 9e-21 ATU_DROME Another transcription unit protein OS=Drosophila melanogaster GN=Atu PE=1 SV=2|Nr: emb|CAG09913.1| 1e-24 unnamed protein product [Tetraodon nigroviridis]|Cog: SPAC140.02 1e-08 --|Kegg: dre:324197 3e-13 wu:fc21e07; wu:fc21e07 [EC:6.3.2.19]; K10631 E3 ubiquitin-protein ligase Topors				gi|156341980|ref|XP_001620839.1|/4.78121e06/hypothetical protein NEMVEDRAFT_v1g146929 [Nematostella vectensis]
MergeConsencus12198	5.52671	5.93312	2.60047	21.3954	10.5427	14.658	0.0156285	3.31402	Nr: ref|XP_002228227.1| 6e-08 hypothetical protein BRAFLDRAFT_90735 [Branchiostoma floridae] gb|EEA52332.1| hypothetical protein BRAFLDRAFT_90735 [Branchiostoma floridae]
MergeConsencus45981	0.538913	0.792052	0.104146	1.71373	1.21254	1.82634	0.00797957	3.31167	Swissprot: P05303 2e-08 EF1A2_DROME Elongation factor 1-alpha 2 OS=Drosophila melanogaster GN=Ef1alpha100E PE=1 SV=2|Nr: ref|XP_002070544.1| 3e-07 GK12116 [Drosophila willistoni] gb|EDW81530.1| GK12116 [Drosophila willistoni]|Kegg: dpo:Dpse_GA15055 5e-08 GA15055-PA [EC:3.6.5.3]; K03231 elongation factor EF-1 alpha subunit				gi|289741277|gb|ADD19386.1|/6.67043e07/translation elongation factor EF1 alpha/tu [Glossina morsitans morsitans]
Contig4400	10.2904	5.86626	2.16942	24.6801	15.7861	20.0786	0.00777083	3.30376	Swissprot: Q3ZBV9 4e-44 DHR11_BOVIN Dehydrogenase/reductase SDR family member 11 OS=Bos taurus GN=DHRS11 PE=2 SV=1|Nr: ref|XP_970890.1| 6e-51 PREDICTED: similar to 3-oxoacyl-[acyl-carrier-protein] reductase [Tribolium castaneum]|Cog: SMa0320 3e-24 --|Kegg: dme:Dmel_CG1386 1e-41 antdh; antdh [EC:1.1.1.184]; K00079 carbonyl reductase (NADPH)
MergeConsencus4407	0.932107	0.958956	0	2.79941	2.09721	1.31619	0.0268112	3.28536	Swissprot: Q24488 9e-49 ROR1_DROME Tyrosine-protein kinase transmembrane receptor Ror OS=Drosophila melanogaster GN=Ror PE=1 SV=1|Nr: ref|XP_001121533.1| 1e-82 PREDICTED: similar to Ror CG4926-PA [Apis mellifera]|IPR: IPR000719; Protein kinase, core		GO:0004871//signal transducer activity;GO:0004713//protein tyrosine kinase activity;GO:0032559//adenyl ribonucleotide binding	GO:0006464//protein modification process	gi|156542965|ref|XP_001602378.1|/3.12685e81/PREDICTED: similar to Trklike receptor tyrosine kinase [Nasonia vitripennis]
MergeConsencus17669	1.90244	2.42325	1.34806	5.07878	6.599	6.92482	0.00132753	3.27872	Swissprot: P36188 1e-78 TNNI_DROME Troponin I OS=Drosophila melanogaster GN=wupA PE=1 SV=3|Nr: ref|XP_001661105.1| 7e-95 troponin i [Aedes aegypti] gb|EAT37116.1| troponin i [Aedes aegypti]|IPR: IPR014887; HIF-1 alpha C terminal transactivation domain|Kegg: mmu:21954 2e-17 Tnni3; troponin I, cardiac; K10371 troponin I				gi|225346695|gb|ACN86370.1|/1.76287e52/troponin I transcript variant C [Bombyx mandarina]
MergeConsencus18857	0	1.40215	0.502821	2.29832	2.31727	1.59207	0.0195314	3.25866	Nr: ref|XP_001602432.1| 1e-89 PREDICTED: similar to GA12584-PA [Nasonia vitripennis]				gi|156550891|ref|XP_001602432.1|/1.30963e84/PREDICTED: similar to GA12584PA [Nasonia vitripennis]
Contig3420	8.40376	13.3178	1.41222	29.9513	25.0739	20.2248	0.00875181	3.25282	Swissprot: Q6DF62 6e-19 RGN_XENTR Regucalcin OS=Xenopus tropicalis GN=rgn PE=2 SV=1|Nr: gb|EEB17822.1| 2e-35 Regucalcin, putative [Pediculus humanus corporis]|Cog: SMa0717_2 4e-11 --|Kegg: pub:SAR11_0777 4e-11 gnl; gluconolactonase [EC:3.1.1.17]; K01053 gluconolactonase
MergeConsencus50436	6.70469	7.11413	0.505639	15.0228	14.9014	16.6257	0.0041307	3.24968	Swissprot: Q9YIB9 1e-100 HIF1A_CHICK Hypoxia-inducible factor 1 alpha OS=Gallus gallus GN=HIF1A PE=2 SV=2|Nr: gb|EEB19024.1| 1e-118 Hypoxia-inducible factor 1 alpha, putative [Pediculus humanus corporis]|IPR: IPR000014; PAS	GO:0043231//intracellular membranebounded organelle;GO:0019861//flagellum;GO:0043234//protein complex	GO:0001071;GO:0046983//protein dimerization activity;GO:0003702//RNA polymerase II transcription factor activity;GO:0003677//DNA binding;GO:0019899//enzyme binding	GO:0006357//regulation of transcription from RNA polymerase II promoter;GO:0010557//positive regulation of macromolecule biosynthetic process;GO:0033500//carbohydrate homeostasis;GO:0001667//ameboidal cell migration;GO:0014823//response to activity;GO:004	gi|242022671|ref|XP_002431762.1|/5.27157e118/Hypoxiainducible factor 1 alpha, putative [Pediculus humanus corporis]
MergeConsencus28398	0.610059	0.573835	0.471583	1.37954	1.37262	2.61878	0.0204719	3.24434	Swissprot: Q15645 2e-61 TRP13_HUMAN Thyroid receptor-interacting protein 13 OS=Homo sapiens GN=TRIP13 PE=1 SV=2|Nr: ref|XP_002229978.1| 3e-61 hypothetical protein BRAFLDRAFT_126689 [Branchiostoma floridae] gb|EEA50525.1| hypothetical protein BRAFLDRAFT_126689 [Branchiostoma floridae]|IPR: IPR003959; AAA ATPase, core	GO:0043073//germ cell nucleus	GO:0008134//transcription factor binding;GO:0032559//adenyl ribonucleotide binding	GO:0006310//DNA recombination;GO:0006281//DNA repair;GO:0007143//female meiosis;GO:0007281//germ cell development;GO:0006351//transcription, DNAdependent;GO:0007128//meiotic prophase I;GO:0007140//male meiosis	gi|149637652|ref|XP_001505738.1|/3.09285e58/PREDICTED: similar to uracil DNA glycosylase [Ornithorhynchus anatinus]
MergeConsencus29016	0.473161	0.46361	1.2192	3.34365	1.68561	1.95985	0.0238673	3.24176	Swissprot: Q9GZY4 8e-06 CG044_HUMAN Uncharacterized protein C7orf44 OS=Homo sapiens GN=C7orf44 PE=2 SV=1|Nr: ref|XP_974885.1| 3e-25 PREDICTED: similar to AGAP006140-PA [Tribolium castaneum]				gi|270010535|gb|EFA06983.1|/8.97926e26/hypothetical protein TcasGA2_TC009944 [Tribolium castaneum]
MergeConsencus5939	2.93647	5.17895	0.756642	13.834	5.68934	9.03009	0.035527	3.21835	Swissprot: Q8WW62 8e-16 TMED6_HUMAN Transmembrane emp24 domain-containing protein 6 OS=Homo sapiens GN=TMED6 PE=2 SV=2|Nr: ref|XP_974756.1| 9e-92 PREDICTED: similar to cop-coated vesicle membrane protein P24 [Tribolium castaneum]|IPR: IPR000348; emp24/gp25L/p24	GO:0031224//intrinsic to membrane		GO:0051234//establishment of localization	gi|91090696|ref|XP_974756.1|/1.50122e88/PREDICTED: similar to copcoated vesicle membrane protein P24 [Tribolium castaneum]
MergeConsencus38307	1.64519	6.01808	0.047102	10.937	7.54038	6.33263	0.0324102	3.21775	Nr: emb|CAA10770.1| 3e-25 reverse transcriptase-like [Bos taurus]				gi|298204331|gb|ADI61814.1|/4.62484e43/endonucleasereverse transcriptase [Bombyx mori]
MergeConsencus3110	0.194522	1.37229	0.451103	1.64954	1.53184	3.29611	0.045781	3.21	Swissprot: Q8BH95 5e-81 ECHM_MOUSE Enoyl-CoA hydratase, mitochondrial OS=Mus musculus GN=Echs1 PE=1 SV=1|Nr: ref|XP_001952077.1| 6e-91 PREDICTED: similar to enoyl-CoA hydratase precursor 1 [Acyrthosiphon pisum]|IPR: IPR001753; Crotonase, core|GO: GO:0003824; catalytic activity; Molecular Function	GO:0031980//mitochondrial lumen;GO:0015630//microtubule cytoskeleton		GO:0009062//fatty acid catabolic process	gi|193598879|ref|XP_001952077.1|/1.24325e82/PREDICTED: similar to enoylCoA hydratase precursor 1 [Acyrthosiphon pisum]
MergeConsencus17816	0.584567	2.06196	0.0903754	4.29616	2.36747	2.11314	0.0455338	3.20682	Swissprot: Q75BI6 2e-08 MED15_ASHGO Mediator of RNA polymerase II transcription subunit 15 OS=Ashbya gossypii GN=GAL11 PE=3 SV=1|Nr: gb|AAB05810.1| 2e-14 super cysteine rich protein; SCRP [Homo sapiens]|Cog: YBR112c 8e-08 --|Kegg: ago:AGOS_AFL008W 1e-07 AFL008Wp; K07466 replication factor A1
MergeConsencus28036	1.34374	1.57993	0	4.1781	2.41869	2.7323	0.0216797	3.19089	Nr: ref|XP_001946318.1| 2e-10 PREDICTED: similar to pol-like protein [Acyrthosiphon pisum]				gi|193669181|ref|XP_001946318.1|/9.694e11/PREDICTED: similar to pollike protein [Acyrthosiphon pisum]
MergeConsencus10505	2.66832	2.62397	0.300021	7.26814	4.36629	6.13813	0.0121451	3.17804	Swissprot: Q9LDU6 3e-71 ST7R_ARATH 7-dehydrocholesterol reductase OS=Arabidopsis thaliana GN=DWF5 PE=1 SV=1|Nr: gb|EEB10709.1| 1e-106 7-dehydrocholesterol reductase, putative [Pediculus humanus corporis]|Kegg: pcu:pc1220 2e-77 dhcR7; putative 7-dehydrocholesterol reductase [EC:1.3.1.21]; K00213 7-dehydrocholesterol reductase	GO:0043231//intracellular membranebounded organelle;GO:0044446//intracellular organelle part;GO:0031090//organelle membrane;GO:0012505//endomembrane system	GO:0016491//oxidoreductase activity	GO:0008203//cholesterol metabolic process	gi|242005174|ref|XP_002423447.1|/2.84523e96/7dehydrocholesterol reductase, putative [Pediculus humanus corporis]
MergeConsencus3750	10.4964	15.7397	2.15584	26.5162	34.5691	28.8696	0.00566551	3.16833	Swissprot: Q95JC9 7e-20 PRP_PIG Basic proline-rich protein OS=Sus scrofa PE=1 SV=2|Nr: ref|ZP_02322168.1| 5e-21 conserved hypothetical protein [Anaeromyxobacter dehalogenans 2CP-1] gb|EDR84742.1| conserved hypothetical protein [Anaeromyxobacter dehalogenans 2CP-1]|IPR: IPR000637; HMG-I and HMG-Y, DNA-binding|Cog: Cgl1939 1e-14 --|Kegg: mmu:228980 4e-18 Taf4a; TAF4A RNA polymerase II, TATA box bin…
MergeConsencus26331	1.08891	2.74353	0.601241	6.15592	5.07502	2.81161	0.0266144	3.16725	Swissprot: P35502 3e-43 ESTF_MYZPE Esterase FE4 OS=Myzus persicae PE=1 SV=1|Nr: gb|ABY53600.1| 2e-82 carboxylesterase [Locusta migratoria manilensis]|IPR: IPR002018; Carboxylesterase, type B|Cog: Rv2045c 8e-33 --|Kegg: dpo:Dpse_GA15379 1e-48 GA15379-PA [EC:3.1.1.1]; K01044 carboxylesterase				gi|164416531|gb|ABY53600.1|/1.00143e82/carboxylesterase [Locusta migratoria manilensis]
MergeConsencus14356	28.6589	47.5271	47.4484	145.392	137.144	106.787	0.00132479	3.14899	Swissprot: Q9EPR2 1e-22 PG12A_MOUSE Group XIIA secretory phospholipase A2 OS=Mus musculus GN=Pla2g12a PE=2 SV=2|Nr: ref|XP_973207.2| 1e-66 PREDICTED: similar to AGAP011108-PA [Tribolium castaneum]|IPR: IPR010711; Phospholipase A2, group XII secretory			GO:0006629//lipid metabolic process	gi|270012243|gb|EFA08691.1|/2.55897e68/hypothetical protein TcasGA2_TC006362 [Tribolium castaneum]
MergeConsencus25182	1.97414	2.67825	0	3.86323	6.15013	4.63171	0.0166946	3.14786	Swissprot: Q3V1G4 1e-27 OLM2B_MOUSE Olfactomedin-like protein 2B OS=Mus musculus GN=Olfml2b PE=2 SV=2|Nr: gb|EEB13364.1| 1e-126 colmedin, putative [Pediculus humanus corporis]|IPR: IPR003112; Olfactomedin-like|Kegg: hsa:22859 2e-18 LPHN1; latrophilin 1; K04592 latrophilin 1				gi|242010709|ref|XP_002426102.1|/5.74537e113/colmedin, putative [Pediculus humanus corporis]
MergeConsencus18576	51.7454	79.7822	25.6602	217.054	138.173	136.54	0.0111977	3.12853	Swissprot: Q5ZJU3 1e-170 ASNS_CHICK Asparagine synthetase [glutamine-hydrolyzing] OS=Gallus gallus GN=ASNS PE=2 SV=3|Nr: gb|EEB18196.1| 0.0 asparagine synthetase, putative [Pediculus humanus corporis]|IPR: IPR000583; Glutamine amidotransferase, class-II		GO:0005488//binding;GO:0016874//ligase activity	GO:0006520//cellular amino acid metabolic process	gi|242020998|ref|XP_002430934.1|/0/asparagine synthetase, putative [Pediculus humanus corporis]
Contig3080	113.256	187.795	37.9126	348.865	372.433	337.162	0.00286459	3.12264	Swissprot: P23438 3e-39 SSRB_CANFA Translocon-associated protein subunit beta OS=Canis familiaris GN=SSR2 PE=1 SV=1|Nr: ref|XP_969577.1| 6e-53 PREDICTED: similar to signal sequence receptor beta subunit [Tribolium castaneum]
MergeConsencus38065	0.939503	4.19766	0	4.78016	6.76433	4.45749	0.034218	3.11495	Swissprot: P38657 4e-36 PDIA3_BOVIN Protein disulfide-isomerase A3 OS=Bos taurus GN=PDIA3 PE=2 SV=1|Nr: dbj|BAD93613.1| 4e-55 protein disulfide-isomerase like protein ERp57 [Bombyx mori]|IPR: IPR006662; Thioredoxin-related	GO:0044444//cytoplasmic part;GO:0015630//microtubule cytoskeleton		GO:0044267//cellular protein metabolic process	gi|62241290|dbj|BAD93613.1|/1.78133e55/protein disulfideisomerase like protein ERp57 [Bombyx mori]
MergeConsencus55746	0.595909	0.875821	0	1.89498	1.34078	1.34633	0.0153843	3.11341	Nr: ref|XP_001198403.1| 5e-15 PREDICTED: similar to endonuclease/reverse transcriptase [Strongylocentrotus purpuratus] ref|XP_001188425.1| PREDICTED: similar to endonuclease/reverse transcriptase [Strongylocentrotus purpuratus]|Kegg: spu:576515 8e-06 LOC576515; similar to farnesyl diphosphate synthase [EC:2.5.1.1 2.5.1.10]; K00787 dimethylallyltranstransferase; K00795 geranyltranstransferase				gi|115709926|ref|XP_001198403.1|/1.91298e15/PREDICTED: similar to endonuclease/reverse transcriptase [Strongylocentrotus purpuratus]
MergeConsencus18393	1.45476	1.02628	0	2.46725	1.9639	3.28672	0.0196496	3.11074	Swissprot: Q8BVH9 1e-78 METL6_MOUSE Methyltransferase-like protein 6 OS=Mus musculus GN=Mettl6 PE=2 SV=2|Nr: ref|XP_001813540.1| 7e-90 PREDICTED: similar to conserved hypothetical protein [Tribolium castaneum]|IPR: IPR013217; Methyltransferase type 12|Kegg: gga:420681 5e-80 METTL6; methyltransferase like 6 [EC:2.1.1.-]; K00599		GO:0016740//transferase activity		gi|189234109|ref|XP_001813540.1|/3.07176e90/PREDICTED: similar to conserved hypothetical protein [Tribolium castaneum]
Contig2998	0.658864	1.29113	0.509309	2.17278	2.47071	2.97713	0.00342256	3.09869	Swissprot: Q0V9F1 1e-21 CO058_XENTR UPF0580 protein C15orf58 homolog OS=Xenopus tropicalis PE=2 SV=1|Nr: ref|XP_001952726.1| 1e-24 PREDICTED: similar to C10F3.4a [Acyrthosiphon pisum]
MergeConsencus1207	3.64285	5.74335	0.255997	14.0414	8.01002	7.76263	0.030526	3.09204	Swissprot: Q4V8U5 1e-124 TM16K_DANRE Transmembrane protein 16K OS=Danio rerio GN=tmem16k PE=2 SV=1|Nr: ref|XP_969407.1| 0.0 PREDICTED: similar to Abnormal X segregation, putative [Tribolium castaneum]|IPR: IPR002198; Short-chain dehydrogenase/reductase SDR	GO:0016020//membrane		GO:0006810//transport	gi|270008243|gb|EFA04691.1|/0/abnormal X segregation [Tribolium castaneum]
MergeConsencus3025	3.09466	4.36636	1.43533	9.33071	10.6765	7.45787	0.0040019	3.08722	Swissprot: Q8MP30 5e-15 Y7791_DICDI Uncharacterized histidine-rich protein DDB0167791 OS=Dictyostelium discoideum GN=DDB_0167791 PE=4 SV=1|Nr: ref|XP_644032.1| 7e-14 hypothetical protein [Dictyostelium discoideum AX4] sp|Q8MP30|Y7791_DICDI RecName: Full=Uncharacterized histidine-rich protein DDB0167791; Flags: Precursor gb|AAM44363.1| hypothetical protein [Dictyostelium discoideum] gb|AAM09303.2|…
MergeConsencus29446	1.29523	1.28861	0.30807	4.64686	2.46589	1.8008	0.0472788	3.08224	Swissprot: P07314 1e-122 GGT1_RAT Gamma-glutamyltranspeptidase 1 OS=Rattus norvegicus GN=Ggt1 PE=1 SV=4|Nr: ref|XP_393584.3| 1e-161 PREDICTED: similar to Gamma-glutamyltranspeptidase 1 precursor (Gamma-glutamyltransferase 1) (GGT 1) (CD224 antigen) isoform 1 [Apis mellifera]|IPR: IPR000101; Gamma-glutamyltranspeptidase|GO: GO:0003840; gamma-glutamyltransferase activity; Molecular Function|Cog: SP…				gi|110757182|ref|XP_393584.3|/5.56238e161/PREDICTED: similar to Gammaglutamyltranspeptidase 1 precursor (Gammaglutamyltransferase 1) (GGT 1) (CD224 antigen) isoform 1 [Apis mellifera]
MergeConsencus9960	1.14425	2.91499	1.32677	6.46877	6.11448	3.9855	0.00883448	3.07626	Swissprot: Q96GN5 4e-32 CDA7L_HUMAN Cell division cycle-associated 7-like protein OS=Homo sapiens GN=CDCA7L PE=1 SV=2|Nr: ref|XP_001121657.1| 2e-38 PREDICTED: similar to cell division cycle associated 7 [Apis mellifera]	GO:0043231//intracellular membranebounded organelle			gi|110763626|ref|XP_001121657.1|/1.55118e36/PREDICTED: similar to cell division cycle associated 7 [Apis mellifera]
MergeConsencus8113	1.39776	1.84889	0	4.44486	3.53804	1.97372	0.0350676	3.06674	Swissprot: P15144 1e-153 AMPN_HUMAN Aminopeptidase N OS=Homo sapiens GN=ANPEP PE=1 SV=4|Nr: ref|XP_396261.2| 0.0 PREDICTED: similar to CG14516-PA, isoform A isoform 1 [Apis mellifera]|Cog: SPBC1921.05 1e-95 --|Kegg: dme:Dmel_CG14516 1e-165 CG14516; CG14516 [EC:3.4.11.2]; K01256 membrane alanyl aminopeptidase
MergeConsencus7848	19.0193	25.1989	2.97286	59.2458	50.2659	34.5973	0.0149436	3.05374	Swissprot: O88884 3e-65 AKAP1_RAT A kinase anchor protein 1, mitochondrial OS=Rattus norvegicus GN=Akap1 PE=2 SV=1|Nr: gb|EEB13294.1| 1e-128 KH domain-containing protein C56G2.1, putative [Pediculus humanus corporis]|IPR: IPR002999; Tudor
MergeConsencus19013	2.15502	2.53382	2.77642	7.10673	8.35059	7.30323	0.000140048	3.04886	Swissprot: Q9W1C9 2e-23 PEB3_DROME Ejaculatory bulb-specific protein 3 OS=Drosophila melanogaster GN=PebIII PE=1 SV=2|Nr: emb|CAJ01470.1| 5e-60 hypothetical protein [Locusta migratoria]			GO:0051707//response to other organism	gi|77415602|emb|CAJ01470.1|/1.13333e53/hypothetical protein [Locusta migratoria]
MergeConsencus431	8.11151	10.4275	2.92613	28.0491	20.9274	16.3715	0.0113292	3.04438	Swissprot: P32198 0.0 CPT1A_RAT Carnitine O-palmitoyltransferase I, liver isoform OS=Rattus norvegicus GN=Cpt1a PE=1 SV=2|Nr: ref|XP_001605305.1| 0.0 PREDICTED: similar to carnitine o-acyltransferase [Nasonia vitripennis]|IPR: IPR000542; Acyltransferase ChoActase/COT/CPT|GO: GO:0008415; acyltransferase activity; Molecular Function|Kegg: dme:Dmel_CG12891 0.0 CPTI; mitochondrial carnitine palmitoyl…		GO:0016747//transferase activity, transferring acyl groups other than aminoacyl groups		gi|156547463|ref|XP_001605305.1|/0/PREDICTED: similar to carnitine oacyltransferase [Nasonia vitripennis]
MergeConsencus3792	1.74659	3.02	0	4.42877	6.2414	3.82999	0.0230878	3.04205	Swissprot: Q8C811 3e-78 S35E2_MOUSE Solute carrier family 35 member E2 OS=Mus musculus GN=Slc35e2 PE=2 SV=1|Nr: ref|XP_001602454.1| 1e-123 PREDICTED: similar to solute carrier family 35, member E2 (predicted) [Nasonia vitripennis]|IPR: IPR004853; Protein of unknown function DUF250|Cog: DR2145 3e-06 --|Kegg: sce:YIR019C 3e-06 MUC1, STA4, FLO11; GPI-anchored cell surface glycoprotein (flocculin) re…				gi|156547337|ref|XP_001602454.1|/3.59924e117/PREDICTED: similar to solute carrier family 35, member E2 (predicted) [Nasonia vitripennis]
MergeConsencus7376	20.8992	26.5326	6.04585	60.5244	54.6673	47.2174	0.00367333	3.03695	Swissprot: O17449 0.0 TBB1_MANSE Tubulin beta-1 chain OS=Manduca sexta PE=2 SV=1|Nr: ref|XP_967267.1| 0.0 PREDICTED: similar to beta1-tubulin [Tribolium castaneum]|IPR: IPR000217; Tubulin	GO:0043234//protein complex;GO:0015630//microtubule cytoskeleton	GO:0032561//guanyl ribonucleotide binding;GO:0017111//nucleosidetriphosphatase activity;GO:0005198//structural molecule activity	GO:0032502//developmental process;GO:0043623//cellular protein complex assembly;GO:0007017//microtubulebased process	gi|12585365|sp|O17449.1|TBB1_MANSE/0/RecName: Full=Tubulin beta1 chain; AltName: Full=Beta1tubulin
MergeConsencus29348	1.28384	0.411686	0	1.97944	2.10081	1.05476	0.0422878	3.02856	Swissprot: A2AQH4 3e-06 BCORL_MOUSE BCoR-like protein 1 OS=Mus musculus GN=Bcorl1 PE=2 SV=1|Nr: ref|XP_973547.1| 3e-16 PREDICTED: similar to epsin-like CG31170-PB [Tribolium castaneum]
MergeConsencus55767	0.537212	1.01063	0.0830541	1.51851	1.81307	1.57783	0.00900725	3.01026	Swissprot: Q99741 8e-84 CDC6_HUMAN Cell division control protein 6 homolog OS=Homo sapiens GN=CDC6 PE=1 SV=1|Nr: ref|XP_001605030.1| 1e-114 PREDICTED: similar to GA19269-PA [Nasonia vitripennis]|IPR: IPR003593; AAA+ ATPase, core				gi|156543656|ref|XP_001605030.1|/1.18721e106/PREDICTED: similar to GA19269PA [Nasonia vitripennis]
MergeConsencus13407	0.917968	2.69832	0.473066	5.40578	2.40963	4.49358	0.0351394	3.01001	Swissprot: P04069 1e-15 CBPB_ASTFL Carboxypeptidase B OS=Astacus fluviatilis PE=1 SV=1|Nr: ref|XP_001810647.1| 6e-22 PREDICTED: similar to CG8560 CG8560-PA [Tribolium castaneum]|Kegg: dpo:Dpse_GA11590 1e-11 GA11590-PA [EC:3.4.17.1]; K01290 carboxypeptidase A				gi|189240241|ref|XP_001810647.1|/1.84212e15/PREDICTED: similar to CG8560 CG8560PA [Tribolium castaneum]
MergeConsencus26500	0.463848	2.90871	0.47808	2.8408	3.65276	5.06519	0.0344973	3.00178	IPR: IPR001412; Aminoacyl-tRNA synthetase, class I, conserved site|GO: GO:0000166; nucleotide binding; Molecular Function
MergeConsencus14388	2.54593	1.60212	0.0554375	4.81452	4.19535	3.56462	0.0131222	2.99144	Swissprot: Q04164 1e-119 SAS_DROME Putative epidermal cell surface receptor OS=Drosophila melanogaster GN=sas PE=1 SV=2|Nr: ref|XP_396419.3| 0.0 PREDICTED: similar to stranded at second CG2507-PB, isoform B [Apis mellifera]|IPR: IPR001007; von Willebrand factor, type C		GO:0016765//transferase activity, transferring alkyl or aryl (other than methyl) groups	GO:0002164//larval development	gi|110756690|ref|XP_396419.3|/6.00332e129/PREDICTED: similar to stranded at second CG2507PB, isoform B [Apis mellifera]
MergeConsencus12638	1.19127	3.31066	0.418573	6.88764	3.89864	3.91479	0.0342783	2.98772	Swissprot: Q6NT16 5e-65 CF192_HUMAN Uncharacterized MFS-type transporter C6orf192 OS=Homo sapiens GN=C6orf192 PE=2 SV=1|Nr: ref|XP_970376.1| 1e-121 PREDICTED: similar to chromaffin granule amine transporter [Tribolium castaneum]|IPR: IPR001958; Tetracycline resistance protein, TetA				gi|229892267|ref|NP_001153545.1|/4.17404e115/uncharacterized MFStype transporter [Tribolium castaneum]
MergeConsencus26200	0.91126	1.10838	0.194321	2.39817	1.87356	2.34278	0.0052863	2.98763	Swissprot: Q25479 0.0 NKCL_MANSE Bumetanide-sensitive sodium-(potassium)-chloride cotransporter OS=Manduca sexta PE=2 SV=1|Nr: gb|EEB16030.1| 0.0 sodium-potassium-chloride cotransporter, putative [Pediculus humanus corporis]|IPR: IPR004841; Amino acid permease-associated region	GO:0016020//membrane	GO:0005275//amine transmembrane transporter activity	GO:0006811//ion transport;GO:0006865//amino acid transport	gi|242016302|ref|XP_002428768.1|/0/sodiumpotassiumchloride cotransporter, putative [Pediculus humanus corporis]
MergeConsencus11228	0.473344	1.66964	0.18295	2.67596	2.66252	1.60413	0.0280025	2.98487	Swissprot: P17719 3e-37 DYR_DROME Dihydrofolate reductase OS=Drosophila melanogaster GN=Dhfr PE=1 SV=3|Nr: ref|XP_001605781.1| 6e-37 PREDICTED: similar to conserved hypothetical protein [Nasonia vitripennis]|Cog: YOR236w 2e-18 --|Kegg: dme:Dmel_CG14887 7e-37 Dhfr; Dihydrofolate reductase [EC:1.5.1.3]; K00287 dihydrofolate reductase		GO:0016646//oxidoreductase activity, acting on the CHNH group of donors, NAD or NADP as acceptor	GO:0006544//glycine metabolic process;GO:0006188//IMP biosynthetic process;GO:0015953;GO:0006725//cellular aromatic compound metabolic process	gi|156543718|ref|XP_001605781.1|/2.85147e32/PREDICTED: similar to conserved hypothetical protein [Nasonia vitripennis]
MergeConsencus68945	1.52046	1.78772	0	3.5815	2.85082	3.43516	0.0109319	2.98276	IPR: IPR000194; ATPase, F1/V1/A1 complex, alpha/beta subunit, nucleotide-binding|GO: GO:0015078; hydrogen ion transmembrane transporter activity; Molecular Function
Contig5487	12.4752	12.3126	19.7797	48.6477	38.0057	45.3638	0.000938057	2.96218	Swissprot: Q56R10 3e-07 ASTA_PENMO Astakine OS=Penaeus monodon PE=2 SV=1|Nr: ref|XP_001945745.1| 6e-09 PREDICTED: similar to astakine [Acyrthosiphon pisum]
MergeConsencus14022	2.26732	1.33293	1.60661	5.60781	5.10141	4.69567	0.000444187	2.95857	Swissprot: Q94529 5e-60 GS1_DROME GS1-like protein OS=Drosophila melanogaster GN=Gs1l PE=2 SV=2|Nr: gb|EEB10900.1| 3e-66 2-deoxyglucose-6-phosphate phosphatase, putative [Pediculus humanus corporis]|IPR: IPR005834; Haloacid dehalogenase-like hydrolase|GO: GO:0003824; catalytic activity; Molecular Function				gi|157167925|ref|XP_001662906.1|/1.00046e58/2deoxyglucose6phosphate phosphatase [Aedes aegypti]
MergeConsencus8979	13.0578	24.9774	10.9978	55.0895	51.0857	38.528	0.00427883	2.95114	Swissprot: Q8R189 5e-52 PAQRA_MOUSE Monocyte to macrophage differentiation factor 2 OS=Mus musculus GN=Mmd2 PE=2 SV=1|Nr: ref|XP_970806.2| 8e-77 PREDICTED: similar to monocyte to macrophage differentiation protein [Tribolium castaneum]|IPR: IPR004254; Hly-III related proteins|GO: GO:0016021; integral to membrane; Cellular Component|Cog: VC0040 3e-24 --|Kegg: dme:Dmel_CG4615 1e-67 CG4615; CG4615; …			GO:0006909//phagocytosis	gi|189239906|ref|XP_970806.2|/4.12254e70/PREDICTED: similar to monocyte to macrophage differentiation protein [Tribolium castaneum]
Contig5560	2194.13	874.84	1590.27	7040.76	2686.96	3881.12	0.0461282	2.92083	Swissprot: Q17127 1e-136 HEXA_BLADI Hexamerin OS=Blaberus discoidalis PE=2 SV=1|Nr: gb|AAX14951.1| 0.0 arylphorin hexamerin-like protein 2 [Romalea microptera]|Nt: gb|AY923852.1| 0.0 Romalea microptera arylphorin hexamerin-like protein 2 mRNA, complete cds|Kegg: dme:Dmel_CG6806 1e-98 Lsp2; Larval serum protein 2 [EC:3.4.17.1]; K01290 carboxypeptidase A
MergeConsencus10211	1.43967	3.54928	1.43598	6.95746	4.85883	6.87252	0.00707323	2.90879	Swissprot: P29747 3e-56 CREBA_DROME Cyclic AMP response element-binding protein A OS=Drosophila melanogaster GN=CrebA PE=1 SV=2|Nr: gb|EEB13844.1| 3e-61 Cyclic AMP-dependent transcription factor ATF-6 beta, putative [Pediculus humanus corporis]|Kegg: gga:418123 3e-44 CREB3L2; cAMP responsive element binding protein 3-like 2; K09048 cAMP response element-binding protein 3	GO:0043231//intracellular membranebounded organelle	GO:0030528//transcription regulator activity;GO:0003676//nucleic acid binding;GO:0005515//protein binding	GO:0003002//regionalization;GO:0006355//regulation of transcription, DNAdependent;GO:0007431//salivary gland development;GO:0008363//larval chitinbased cuticle development	gi|242011695|ref|XP_002426582.1|/6.97828e45/Cyclic AMPdependent transcription factor ATF6 beta, putative [Pediculus humanus corporis]
MergeConsencus23764	0.811386	1.04074	0.228076	2.2935	1.57665	2.16646	0.00789088	2.90194	Swissprot: Q9U518 1e-137 ASPG_DIRIM L-asparaginase OS=Dirofilaria immitis PE=1 SV=1|Nr: ref|XP_001992251.1| 0.0 GH24648 [Drosophila grimshawi] gb|EDV91958.1| GH24648 [Drosophila grimshawi]|IPR: IPR000873; AMP-dependent synthetase and ligase				gi|170045297|ref|XP_001850251.1|/0/Lasparaginase [Culex quinquefasciatus]
MergeConsencus10965	0.660783	1.78695	0.459713	4.01577	2.6018	1.79148	0.0379331	2.89225	Swissprot: Q9H993 4e-96 CF211_HUMAN UPF0364 protein C6orf211 OS=Homo sapiens GN=C6orf211 PE=1 SV=1|Nr: ref|XP_001604677.1| 1e-107 PREDICTED: hypothetical protein [Nasonia vitripennis]|IPR: IPR002791; Protein of unknown function DUF89				gi|156548422|ref|XP_001604677.1|/7.44086e107/PREDICTED: hypothetical protein [Nasonia vitripennis]
MergeConsencus18206	3.33466	5.19508	0.902205	12.6072	7.12774	7.53397	0.0255116	2.89112	Swissprot: P23572 1e-121 CDC2_DROME Cell division control protein 2 homolog OS=Drosophila melanogaster GN=cdc2 PE=1 SV=1|Nr: ref|XP_393093.3| 1e-131 PREDICTED: similar to Cell division control protein 2 homolog (p34 protein kinase) [Apis mellifera]|IPR: IPR000719; Protein kinase, core		GO:0004672//protein kinase activity;GO:0032559//adenyl ribonucleotide binding	GO:0006464//protein modification process	gi|110765116|ref|XP_393093.3|/3.56588e125/PREDICTED: similar to Cell division control protein 2 homolog (p34 protein kinase) [Apis mellifera]
MergeConsencus3166	0.465611	1.45988	0	1.53547	2.44442	1.57793	0.0407035	2.88645	Swissprot: A2BDA5 9e-10 DCA15_XENLA DDB1- and CUL4-associated factor 15 OS=Xenopus laevis GN=dcaf15 PE=2 SV=1|Nr: gb|EEB13954.1| 2e-23 conserved hypothetical protein [Pediculus humanus corporis]				gi|242011922|ref|XP_002426692.1|/9.89072e22/conserved hypothetical protein [Pediculus humanus corporis]
MergeConsencus26333	2.22779	2.85751	0.234833	5.72472	3.98719	5.60519	0.0131559	2.87908	Swissprot: Q9VXN9 2e-24 PGPLE_DROME Peptidoglycan-recognition protein-LE OS=Drosophila melanogaster GN=PGRP-LE PE=1 SV=1|Nr: ref|XP_001656352.1| 2e-25 peptidoglycan recognition protein-lc isoform [Aedes aegypti] gb|EAT34673.1| peptidoglycan recognition protein-lc isoform [Aedes aegypti]|Kegg: dme:Dmel_CG8995 4e-24 PGRP-LE; Peptidoglycan recognition protein LE [EC:3.5.1.28]; K01446 N-acetylmuramoy…	GO:0016021//integral to membrane	GO:0008329//pattern recognition receptor activity;GO:0005539//glycosaminoglycan binding	GO:0023060;GO:0042742//defense response to bacterium;GO:0010259//multicellular organismal aging;GO:0002376//immune system process;GO:0031349//positive regulation of defense response	gi|195134630|ref|XP_002011740.1|/3.12013e23/GI10922 [Drosophila mojavensis]
MergeConsencus14466	0.616442	1.3288	0.158839	1.30685	2.08047	2.66939	0.0323849	2.87855	Swissprot: Q5E9T8 2e-50 KIME_BOVIN Mevalonate kinase OS=Bos taurus GN=MVK PE=2 SV=1|Nr: ref|NP_001093299.1| 9e-58 mevalonate kinase [Bombyx mori] dbj|BAF62109.1| mevalonate kinase [Bombyx mori]|IPR: IPR006204; GHMP kinase		GO:0005488//binding;GO:0016772//transferase activity, transferring phosphoruscontaining groups	GO:0008152//metabolic process	gi|153792072|ref|NP_001093299.1|/1.27085e53/mevalonate kinase [Bombyx mori]
MergeConsencus3756	4.26312	1.64589	1.67231	6.38489	7.01496	8.40971	0.00541628	2.87675	Nr: ref|XP_001197542.1| 6e-10 PREDICTED: similar to ENSANGP00000020392 [Strongylocentrotus purpuratus] ref|XP_001196101.1| PREDICTED: similar to ENSANGP00000020392 [Strongylocentrotus purpuratus]				gi|270003020|gb|EEZ99467.1|/5.17557e27/hypothetical protein TcasGA2_TC000033 [Tribolium castaneum]
MergeConsencus15323	13.3019	26.7394	12.2726	62.8683	41.9968	45.4023	0.00744419	2.87242	Swissprot: Q9VTZ6 8e-86 PMM_DROME Probable phosphomannomutase OS=Drosophila melanogaster GN=CG10688 PE=2 SV=1|Nr: ref|XP_002206150.1| 5e-95 hypothetical protein BRAFLDRAFT_113814 [Branchiostoma floridae] gb|EEA74248.1| hypothetical protein BRAFLDRAFT_113814 [Branchiostoma floridae]|IPR: IPR005002; Eukaryotic phosphomannomutase|GO: GO:0004615; phosphomannomutase activity; Molecular Function	GO:0044424//intracellular part	GO:0016868//intramolecular transferase activity, phosphotransferases	GO:0009226//nucleotidesugar biosynthetic process;GO:0006013//mannose metabolic process	gi|260808775|ref|XP_002599182.1|/8.2588e94/hypothetical protein BRAFLDRAFT_113552 [Branchiostoma floridae]
MergeConsencus55675	1.59413	1.17146	0.30807	3.66116	2.69006	2.4761	0.010891	2.87192	Swissprot: Q58DA6 9e-50 S35A2_BOVIN UDP-galactose translocator OS=Bos taurus GN=SLC35A2 PE=2 SV=1|Nr: ref|XP_001601496.1| 3e-74 PREDICTED: similar to sugar transporter [Nasonia vitripennis]|IPR: IPR007271; Nucleotide-sugar transporter|GO: GO:0000139; Golgi membrane; Cellular Component	GO:0016020//membrane	GO:0015165//pyrimidine nucleotide sugar transmembrane transporter activity	GO:0008645//hexose transport;GO:0015781//pyrimidine nucleotidesugar transport	gi|156552468|ref|XP_001601496.1|/2.01127e64/PREDICTED: similar to sugar transporter [Nasonia vitripennis]
MergeConsencus4632	107.934	185.99	47.7461	369.751	308.095	301.33	0.00477803	2.86585	Swissprot: P43307 2e-71 SSRA_HUMAN Translocon-associated protein subunit alpha OS=Homo sapiens GN=SSR1 PE=1 SV=3|Nr: gb|EEB14359.1| 3e-94 translocon-associated protein subunit alpha precursor, putative [Pediculus humanus corporis]|IPR: IPR005595; Translocon-associated protein (TRAP), alpha subunit	GO:0044444//cytoplasmic part			gi|91079082|ref|XP_975256.1|/2.339e76/PREDICTED: similar to transloconassociated protein subunit alpha [Tribolium castaneum]
MergeConsencus18285	9.07458	12.147	6.79891	27.8211	32.3539	20.029	0.0056712	2.86233	Swissprot: P70054 1e-144 FEN1B_XENLA Flap endonuclease 1-B OS=Xenopus laevis GN=fen1-B PE=1 SV=1|Nr: ref|XP_001603401.1| 1e-167 PREDICTED: similar to flap endonuclease-1 [Nasonia vitripennis]|IPR: IPR002421; 5'-3' exonuclease		GO:0003676//nucleic acid binding;GO:0004520//endodeoxyribonuclease activity	GO:0006259//DNA metabolic process	gi|156553807|ref|XP_001603401.1|/1.17365e151/PREDICTED: similar to flap endonuclease1 [Nasonia vitripennis]
MergeConsencus4414	9.239	18.7193	5.35639	39.9893	25.5203	29.8194	0.0120379	2.86147	Swissprot: A1L2I9 1e-68 T214B_XENLA Transmembrane protein 214-B OS=Xenopus laevis GN=tmem214-B PE=2 SV=1|Nr: ref|XP_001601024.1| 1e-108 PREDICTED: similar to conserved hypothetical protein [Nasonia vitripennis]				gi|156551555|ref|XP_001601024.1|/4.73396e109/PREDICTED: similar to conserved hypothetical protein [Nasonia vitripennis]
MergeConsencus2633	4.01667	4.72271	2.48395	13.9083	8.58553	9.52859	0.00861333	2.8532	Swissprot: Q75JC9 2e-07 Y8484_DICDI Uncharacterized protein DDB_0168484 OS=Dictyostelium discoideum GN=DDB_0168484 PE=4 SV=1|Nr: ref|XP_001606941.1| 4e-69 PREDICTED: similar to conserved hypothetical protein [Nasonia vitripennis]|IPR: IPR000237; GRIP|Kegg: ssc:397098 3e-06 ACR; acrosin [EC:3.4.21.10]; K01317 acrosin			GO:0007617//mating behavior	gi|156544261|ref|XP_001606941.1|/1.50765e69/PREDICTED: similar to conserved hypothetical protein [Nasonia vitripennis]
MergeConsencus23412	12.3047	19.6435	0.778975	29.9088	25.9549	37.3263	0.0174584	2.84748	Swissprot: Q64435 4e-58 UD16_MOUSE UDP-glucuronosyltransferase 1-6 OS=Mus musculus GN=Ugt1a6 PE=1 SV=1|Nr: ref|XP_967685.2| 1e-101 PREDICTED: similar to glucosyl/glucuronosyl transferases [Tribolium castaneum]|IPR: IPR002213; UDP-glucuronosyl/UDP-glucosyltransferase|GO: GO:0008152; metabolic process; Biological Process				gi|91090210|ref|XP_967762.1|/1.61415e88/PREDICTED: similar to glucosyl/glucuronosyl transferases [Tribolium castaneum]
Contig3485	1.54266	1.45106	3.33898	4.79661	5.90059	7.31916	0.00754371	2.84498	Swissprot: Q3ZBV9 1e-38 DHR11_BOVIN Dehydrogenase/reductase SDR family member 11 OS=Bos taurus GN=DHRS11 PE=2 SV=1|Nr: emb|CAJ82098.1| 1e-38 Novel protein containing short chain dehydrogenase domain [Xenopus tropicalis]|Nt: dbj|AK283023.1| 4e-09 Gryllus bimaculatus mRNA, GBcontig29884|Cog: Z0343 1e-22 --|Kegg: dme:Dmel_CG1386 3e-32 antdh; antdh [EC:1.1.1.184]; K00079 carbonyl reductase (NADPH)
MergeConsencus2082	2.81333	3.08733	0	6.62692	3.58695	6.56801	0.0307553	2.84407	Swissprot: Q9D6X5 1e-13 CT054_MOUSE Uncharacterized protein C20orf54 homolog OS=Mus musculus PE=2 SV=2|Nr: ref|XP_001848251.1| 2e-21 conserved hypothetical protein [Culex quinquefasciatus] gb|EDS27934.1| conserved hypothetical protein [Culex quinquefasciatus]	GO:0016020//membrane			gi|170040965|ref|XP_001848251.1|/4.15207e21/conserved hypothetical protein [Culex quinquefasciatus]
MergeConsencus3420	1.80691	4.24905	1.44849	6.62084	10.239	4.46034	0.0363106	2.84101	Swissprot: Q96CX6 2e-80 LRC58_HUMAN Leucine-rich repeat-containing protein 58 OS=Homo sapiens GN=LRRC58 PE=2 SV=2|Nr: ref|XP_001847996.1| 1e-111 internalin A [Culex quinquefasciatus] gb|EDS27337.1| internalin A [Culex quinquefasciatus]|IPR: IPR001611; Leucine-rich repeat				gi|170040416|ref|XP_001847996.1|/2.37235e89/internalin A [Culex quinquefasciatus]
MergeConsencus43427	13.7929	15.1803	0.185967	32.641	22.9144	27.1764	0.0161815	2.83725	Swissprot: Q25641 2e-06 CRPI_PERAM Allergen Cr-PI OS=Periplaneta americana PE=1 SV=1|Nr: gb|AAX14951.1| 6e-14 arylphorin hexamerin-like protein 2 [Romalea microptera]				gi|60256959|gb|AAX14951.1|/2.6612e14/arylphorin hexamerinlike protein 2 [Romalea microptera]
MergeConsencus54429	2.31897	1.6779	0.137892	5.29436	3.21084	3.22415	0.027868	2.83676	Swissprot: Q9P2K5 5e-14 MYEF2_HUMAN Myelin expression factor 2 OS=Homo sapiens GN=MYEF2 PE=1 SV=2|Nr: ref|XP_395436.2| 9e-25 PREDICTED: similar to CG9373-PA [Apis mellifera]	GO:0043231//intracellular membranebounded organelle	GO:0003729//mRNA binding	GO:0006403//RNA localization;GO:0000578//embryonic axis specification	gi|66510755|ref|XP_395436.2|/8.83552e20/PREDICTED: similar to CG9373PA [Apis mellifera]
Contig631	2.51124	1.96844	0.97061	4.14074	7.53363	3.78243	0.0296793	2.83596	Nr: ref|XP_001688073.1| 3e-07 AGAP007011-PA [Anopheles gambiae str. PEST] gb|EDO64722.1| AGAP007011-PA [Anopheles gambiae str. PEST]
MergeConsencus17604	1.26339	1.15536	0.542563	1.58718	3.31635	3.48867	0.0244893	2.83395	Swissprot: Q91VA6 1e-123 PDIP2_MOUSE Polymerase delta-interacting protein 2 OS=Mus musculus GN=Poldip2 PE=2 SV=1|Nr: ref|XP_966471.1| 1e-145 PREDICTED: similar to AGAP001153-PA [Tribolium castaneum]|IPR: IPR007474; ApaG				gi|91085387|ref|XP_966471.1|/2.77623e145/PREDICTED: similar to AGAP001153PA [Tribolium castaneum]
MergeConsencus18106	0.924199	1.08665	0	1.52389	1.73285	2.43604	0.0241358	2.83103	Swissprot: Q5U3C3 4e-27 TM164_HUMAN Transmembrane protein 164 OS=Homo sapiens GN=TMEM164 PE=2 SV=1|Nr: ref|XP_973485.1| 4e-49 PREDICTED: similar to CG14591 CG14591-PA [Tribolium castaneum]				gi|91094907|ref|XP_973485.1|/1.60819e49/PREDICTED: similar to CG14591 CG14591PA [Tribolium castaneum]
MergeConsencus5296	0.609999	0.83676	0.471536	2.44269	1.48685	1.49301	0.0125926	2.82676	Swissprot: O14657 2e-54 TOR1B_HUMAN Torsin-1B OS=Homo sapiens GN=TOR1B PE=2 SV=2|Nr: ref|XP_973777.1| 2e-74 PREDICTED: similar to Torsin family protein [Tribolium castaneum]|IPR: IPR001270; Chaperonin clpA/B	GO:0044424//intracellular part			gi|91076772|ref|XP_973777.1|/4.17422e75/PREDICTED: similar to Torsin family protein [Tribolium castaneum]
MergeConsencus13343	2.74674	4.58597	0.297257	9.16162	5.68569	6.70216	0.0226611	2.82432	Swissprot: P20028 0.0 RPA2_DROME DNA-directed RNA polymerase I subunit RPA2 OS=Drosophila melanogaster GN=RpI135 PE=2 SV=2|Nr: ref|XP_001606574.1| 0.0 PREDICTED: similar to CG4033-PA, partial [Nasonia vitripennis]|IPR: IPR007642; RNA polymerase Rpb2, domain 2	GO:0044452//nucleolar part	GO:0034062//RNA polymerase activity	GO:0006351//transcription, DNAdependent	gi|156547733|ref|XP_001606574.1|/0/PREDICTED: similar to CG4033PA, partial [Nasonia vitripennis]
MergeConsencus22948	0.61207	1.51128	0.804333	3.54672	2.61657	2.07427	0.0127468	2.81368	Swissprot: Q6ZNB6 0.0 NFXL1_HUMAN NF-X1-type zinc finger protein NFXL1 OS=Homo sapiens GN=NFXL1 PE=1 SV=2|Nr: ref|XP_970903.1| 0.0 PREDICTED: similar to ovarian zinc finger protein [Tribolium castaneum]|IPR: IPR000967; Zinc finger, NF-X1-type				gi|91079540|ref|XP_970903.1|/0/PREDICTED: similar to ovarian zinc finger protein [Tribolium castaneum]
MergeConsencus39345	7.31519	3.84783	0	11.0189	8.87918	11.4168	0.0203883	2.80523	Nr: ref|XP_001602432.1| 8e-12 PREDICTED: similar to GA12584-PA [Nasonia vitripennis]				gi|156550891|ref|XP_001602432.1|/3.77438e12/PREDICTED: similar to GA12584PA [Nasonia vitripennis]
MergeConsencus7069	7.25948	6.16098	0.126579	17.2029	10.8072	9.98876	0.0312389	2.80495	Nr: ref|XP_001944498.1| 1e-09 PREDICTED: similar to 6-phosphofructo-2-kinase/fructose-2,6-biphosphatase 4 [Acyrthosiphon pisum]|IPR: IPR013079; 6-phosphofructo-2-kinase				gi|193697719|ref|XP_001944498.1|/2.32211e09/PREDICTED: similar to 6phosphofructo2kinase/fructose2,6biphosphatase 4 [Acyrthosiphon pisum]
MergeConsencus9503	0.945045	1.11116	0.273949	2.00348	2.32567	2.20186	0.00340225	2.80282	Swissprot: Q7T3C6 1e-99 CPSF5_DANRE Cleavage and polyadenylation specificity factor subunit 5 OS=Danio rerio GN=cpsf5 PE=2 SV=1|Nr: ref|XP_308558.3| 1e-107 AGAP007242-PA [Anopheles gambiae str. PEST] gb|EAA04203.3| AGAP007242-PA [Anopheles gambiae str. PEST]|Kegg: gga:415697 4e-87 AMFR, LOC415697; autocrine motility factor receptor [EC:6.3.2.19]; K10636 autocrine motility factor receptor	GO:0005815//microtubule organizing center;GO:0016604//nuclear body	GO:0042802//identical protein binding;GO:0003723//RNA binding;GO:0019899//enzyme binding;GO:0003824//catalytic activity	GO:0006397//mRNA processing	gi|118778290|ref|XP_308558.3|/2.89702e107/AGAP007242PA [Anopheles gambiae str. PEST]
MergeConsencus29387	1.91092	2.76531	0	6.12863	3.63805	3.32102	0.0404196	2.79877	Swissprot: Q5FVF4 6e-47 TM7S3_RAT Transmembrane 7 superfamily member 3 OS=Rattus norvegicus GN=Tm7sf3 PE=2 SV=1|Nr: ref|XP_974624.2| 2e-52 PREDICTED: similar to transmembrane 7 superfamily member 3 [Tribolium castaneum]				gi|156555696|ref|XP_001602858.1|/2.22813e43/PREDICTED: hypothetical protein [Nasonia vitripennis]
MergeConsencus14485	2.10285	3.42958	0	5.46467	5.6471	4.36782	0.0184081	2.79797	Swissprot: Q9VYB7 1e-139 TPST_DROME Protein-tyrosine sulfotransferase OS=Drosophila melanogaster GN=Tango13 PE=2 SV=2|Nr: ref|XP_001606792.1| 1e-146 PREDICTED: similar to LP09162p [Nasonia vitripennis]|Cog: Cgl1939 1e-07 --|Kegg: dme:Dmel_CG32632 1e-139 Tango13; Transport and Golgi organization 13 [EC:2.8.2.20]; K01021 protein-tyrosine sulfotransferase	GO:0043231//intracellular membranebounded organelle	GO:0008146//sulfotransferase activity		gi|156543274|ref|XP_001606792.1|/6.00428e146/PREDICTED: similar to LP09162p [Nasonia vitripennis]
MergeConsencus23681	1.01889	1.84305	0	2.88004	2.73333	2.3905	0.0180633	2.79666	Swissprot: P49916 1e-175 DNL3_HUMAN DNA ligase 3 OS=Homo sapiens GN=LIG3 PE=1 SV=1|Nr: gb|EEB12512.1| 0.0 DNA ligase, putative [Pediculus humanus corporis]|IPR: IPR012309; ATP dependent DNA ligase, C-terminal	GO:0031981//nuclear lumen	GO:0005488//binding;GO:0016886//ligase activity, forming phosphoric ester bonds	GO:0048232//male gamete generation;GO:0002562	gi|242008936|ref|XP_002425250.1|/0/DNA ligase, putative [Pediculus humanus corporis]
MergeConsencus54146	0.683675	0.602887	0.396366	1.20782	2.11509	1.35154	0.0137798	2.77757	Nr: ref|XP_967477.1| 4e-09 PREDICTED: similar to arylalkylamine N-acetyltransferase isoform 1 [Tribolium castaneum]
MergeConsencus17110	13.0439	21.8828	16.4772	53.0575	45.2751	44.0252	0.000683166	2.7694	Swissprot: Q9QYC3 3e-20 BHLH8_MOUSE Class B basic helix-loop-helix protein 8 OS=Mus musculus GN=Bhlhb8 PE=2 SV=1|Nr: ref|XP_001608175.1| 4e-43 PREDICTED: hypothetical protein [Nasonia vitripennis]|IPR: IPR001092; Basic helix-loop-helix dimerisation region bHLH	GO:0043231//intracellular membranebounded organelle	GO:0003824//catalytic activity	GO:0006355//regulation of transcription, DNAdependent;GO:0046879//hormone secretion;GO:0002790//peptide secretion	gi|242024378|ref|XP_002432605.1|/1.08592e33/basic helixloophelix protein mist1, putative [Pediculus humanus corporis]
MergeConsencus9399	32.2441	43.9729	1.1385	74.7877	69.9446	68.8084	0.0122687	2.76051	Swissprot: Q9JLR1 0.0 S61A2_MOUSE Protein transport protein Sec61 subunit alpha isoform 2 OS=Mus musculus GN=Sec61a2 PE=2 SV=3|Nr: ref|NP_001119639.1| 0.0 Sec61 alpha 1 subunit [Acyrthosiphon pisum] gb|AAU84942.1| probable transport protein Sec61 alpha subunit [Toxoptera citricida] gb|ABD76381.1| putative transport protein Sec61 alpha subunit [Acyrthosiphon pisum]|IPR: IPR002208; SecY protein|GO:…	GO:0031224//intrinsic to membrane;GO:0005783//endoplasmic reticulum	GO:0008320//protein transmembrane transporter activity	GO:0001700//embryonic development via the syncytial blastoderm;GO:0007033//vacuole organization;GO:0006614//SRPdependent cotranslational protein targeting to membrane;GO:0006914//autophagy;GO:0006984//ERnucleus signaling pathway	gi|187177323|ref|NP_001119639.1|/0/Sec61 alpha 1 subunit [Acyrthosiphon pisum]
MergeConsencus635	1.24163	1.9465	0	3.65589	3.14283	1.98702	0.0342063	2.75576	Swissprot: Q6GPP7 2e-68 TM209_XENLA Transmembrane protein 209 OS=Xenopus laevis GN=tmem209 PE=2 SV=1|Nr: gb|EEB15516.1| 1e-124 conserved hypothetical protein [Pediculus humanus corporis]|IPR: IPR010916; TonB box, conserved site				gi|242015185|ref|XP_002428254.1|/2.62408e121/conserved hypothetical protein [Pediculus humanus corporis]
MergeConsencus3160	20.2699	10.5924	0.108812	21.8839	36.7388	26.7142	0.0337945	2.75537	Swissprot: Q5R4Q3 3e-49 SEC62_PONAB Translocation protein SEC62 OS=Pongo abelii GN=SEC62 PE=2 SV=1|Nr: gb|EEB17128.1| 2e-82 conserved hypothetical protein [Pediculus humanus corporis]|IPR: IPR004728; Translocation protein Sec62|GO: GO:0008565; protein transporter activity; Molecular Function	GO:0044425//membrane part			gi|242018815|ref|XP_002429866.1|/1.3588e67/conserved hypothetical protein [Pediculus humanus corporis]
MergeConsencus2898	5.89744	4.50715	1.97547	8.335	13.3796	12.3247	0.00984805	2.74953	Swissprot: Q04503 6e-06 DP87_DICDI Prespore protein Dp87 OS=Dictyostelium discoideum GN=cotD PE=2 SV=2|Nr: ref|XP_394817.1| 1e-69 PREDICTED: similar to CG14301-PA [Apis mellifera]|IPR: IPR002557; Chitin binding protein, peritrophin-A|GO: GO:0005576; extracellular region; Cellular Component		GO:0030247//polysaccharide binding	GO:0006022	gi|156553554|ref|XP_001602012.1|/1.9308e68/PREDICTED: similar to conserved hypothetical protein [Nasonia vitripennis]
MergeConsencus44966	0.389414	1.83146	0	1.92629	1.97138	2.1995	0.0417767	2.7454	Nr: gb|EEB14627.1| 1e-15 UDP-glucuronosyltransferase 1-8 precursor, putative [Pediculus humanus corporis]|Kegg: dme:Dmel_CG18578 8e-13 Ugt86Da; Ugt86Da [EC:2.4.1.17]; K04628 UDP-galactose ceramide galactosyltransferase		GO:0016757//transferase activity, transferring glycosyl groups		gi|242013333|ref|XP_002427365.1|/5.84668e16/UDPglucuronosyltransferase 18 precursor, putative [Pediculus humanus corporis]
MergeConsencus54995	0.932639	2.19315	1.62212	5.93155	3.67222	3.42404	0.0173055	2.74391	Swissprot: Q58CR4 6e-34 TMM15_BOVIN Transmembrane protein 15 OS=Bos taurus GN=TMEM15 PE=2 SV=1|Nr: ref|XP_969890.2| 1e-47 PREDICTED: similar to AGAP002683-PA [Tribolium castaneum]|Cog: YMR013c 1e-15 --|Kegg: osa:4328285 1e-18 Os02g0146500; hypothetical protein [EC:2.7.1.108]; K00902 dolichol kinase				gi|270002035|gb|EEZ98482.1|/6.09708e50/hypothetical protein TcasGA2_TC000975 [Tribolium castaneum]
MergeConsencus13600	7.25068	9.4644	7.45731	31.0032	17.0742	18.1861	0.0180951	2.74129	Swissprot: Q96RR1 1e-70 PEO1_HUMAN Twinkle protein, mitochondrial OS=Homo sapiens GN=PEO1 PE=1 SV=1|Nr: ref|XP_001663405.1| 1e-109 pom1 [Aedes aegypti] gb|EAT34536.1| pom1 [Aedes aegypti]|Kegg: tan:TA20960 4e-46 DNA polymerase i, putative [EC:2.7.7.7]; K02335 DNA polymerase I	GO:0005759//mitochondrial matrix	GO:0003678//DNA helicase activity;GO:0032559//adenyl ribonucleotide binding;GO:0043566//structurespecific DNA binding	GO:0051259//protein oligomerization;GO:0006261//DNAdependent DNA replication;GO:0007005//mitochondrion organization	gi|157135044|ref|XP_001663405.1|/5.89092e109/pom1 [Aedes aegypti]
MergeConsencus70627	1.90441	2.23916	1.1041	4.71021	4.82047	4.84045	0.00042793	2.73858	Nr: ref|XP_001965502.1| 7e-09 GF22422 [Drosophila ananassae] gb|EDV35017.1| GF22422 [Drosophila ananassae]|Kegg: dme:Dmel_CG12141 2e-06 Aats-lys; Lysyl-tRNA synthetase [EC:6.1.1.6]; K04567 lysyl-tRNA synthetase, class II
MergeConsencus3078	0.578606	0.952436	0.536723	2.78038	1.30185	1.56869	0.0326379	2.73286	Swissprot: Q99M31 3e-79 HSP7E_MOUSE Heat shock 70 kDa protein 14 OS=Mus musculus GN=Hspa14 PE=2 SV=2|Nr: ref|XP_002207762.1| 5e-78 hypothetical protein BRAFLDRAFT_119358 [Branchiostoma floridae] gb|EEA72857.1| hypothetical protein BRAFLDRAFT_119358 [Branchiostoma floridae]|IPR: IPR001023; Heat shock protein Hsp70				gi|12805195|gb|AAH02056.1|/3.16712e77/Heat shock protein 14 [Mus musculus]
MergeConsencus6953	72.5176	116.433	33.9168	191.345	267.481	149.956	0.0185987	2.73159	Swissprot: Q7TQA3 2e-55 RDHE2_MOUSE Epidermal retinal dehydrogenase 2 OS=Mus musculus GN=Rdhe2 PE=2 SV=1|Nr: ref|XP_001600199.1| 4e-98 PREDICTED: similar to short-chain dehydrogenase [Nasonia vitripennis]|IPR: IPR002198; Short-chain dehydrogenase/reductase SDR	GO:0044444//cytoplasmic part	GO:0003824//catalytic activity	GO:0008152//metabolic process	gi|156546038|ref|XP_001600199.1|/1.55896e91/PREDICTED: similar to shortchain dehydrogenase [Nasonia vitripennis]
MergeConsencus6449	31.9744	38.2975	28.759	100.728	76.732	92.0718	0.000835761	2.72169	Swissprot: Q55FI4 7e-10 NOL5_DICDI Nucleolar protein 5 OS=Dictyostelium discoideum GN=nol5 PE=3 SV=1|Nr: ref|XP_001583294.1| 1e-13 hypothetical protein [Trichomonas vaginalis G3] gb|EAY22308.1| hypothetical protein TVAG_377870 [Trichomonas vaginalis G3]|Kegg: rno:29456 3e-09 Map1b; microtubule-associated protein 1b; K10429 microtubule-associated protein 1
MergeConsencus7478	10.5645	9.26687	10.3702	35.7873	18.6764	27.657	0.0125549	2.71909	Swissprot: Q64674 7e-93 SPEE_MOUSE Spermidine synthase OS=Mus musculus GN=Srm PE=2 SV=1|Nr: ref|XP_001120306.1| 1e-114 PREDICTED: similar to spermidine synthase [Apis mellifera]|IPR: IPR001045; Spermine synthase|GO: GO:0003824; catalytic activity; Molecular Function|Cog: SPBC12C2.07c 1e-80 --|Kegg: xla:431924 8e-93 MGC83147; hypothetical protein MGC83147 [EC:2.5.1.16]; K00797 spermidine synthase	GO:0044444//cytoplasmic part	GO:0016765//transferase activity, transferring alkyl or aryl (other than methyl) groups	GO:0006596//polyamine biosynthetic process	gi|110762382|ref|XP_001120306.1|/8.94604e115/PREDICTED: similar to spermidine synthase [Apis mellifera]
MergeConsencus38930	3.28696	3.32796	0	7.41996	3.49235	7.01363	0.0430961	2.70993	Swissprot: Q9UGB7 6e-44 MIOX_HUMAN Inositol oxygenase OS=Homo sapiens GN=MIOX PE=1 SV=1|Nr: ref|XP_001950796.1| 4e-60 PREDICTED: similar to myo-inositol oxygenase [Acyrthosiphon pisum]|IPR: IPR007828; Protein of unknown function DUF706|Kegg: mcc:720668 3e-44 MIOX; myo-inositol oxygenase [EC:1.13.99.1]; K00469 inositol oxygenase	GO:0044424//intracellular part	GO:0046914//transition metal ion binding;GO:0016701//oxidoreductase activity, acting on single donors with incorporation of molecular oxygen	GO:0006020//inositol metabolic process	gi|193629557|ref|XP_001950796.1|/1.57664e60/PREDICTED: similar to myoinositol oxygenase [Acyrthosiphon pisum]
MergeConsencus1994	0.663142	1.09159	0	2.06192	1.04444	1.64806	0.0412211	2.70948	Swissprot: Q924X6 1e-106 LRP8_MOUSE Low-density lipoprotein receptor-related protein 8 OS=Mus musculus GN=Lrp8 PE=1 SV=2|Nr: emb|CAA03855.1| 0.0 lipophorin receptor [Locusta migratoria]|IPR: IPR000033; Low-density lipoprotein receptor, YWTD repeat	GO:0031224//intrinsic to membrane	GO:0046872//metal ion binding;GO:0004871//signal transducer activity		gi|2764400|emb|CAA03855.1|/0/lipophorin receptor [Locusta migratoria]
MergeConsencus5569	19.397	37.9968	19.47	84.8514	71.7744	51.3047	0.00971836	2.70518	Nr: gb|ACJ83425.1| 6e-07 unknown [Medicago truncatula]
MergeConsencus8461	44.5062	85.8396	7.48228	133.135	117.183	121.492	0.0139909	2.69764	Swissprot: P30432 0.0 FUR2_DROME Furin-like protease 2 OS=Drosophila melanogaster GN=Fur2 PE=1 SV=2|Nr: gb|EEB10108.1| 0.0 Endoprotease FURIN, putative [Pediculus humanus corporis]|IPR: IPR000209; Peptidase S8 and S53, subtilisin, kexin, sedolisin	GO:0016020//membrane	GO:0004175//endopeptidase activity	GO:0019538//protein metabolic process	gi|242003747|ref|XP_002422846.1|/0/Endoprotease FURIN, putative [Pediculus humanus corporis]
Contig5386	2.8247	3.32122	0.335927	7.67736	4.88885	4.90911	0.0243621	2.69604	Swissprot: P49154 1e-128 RS2_URECA 40S ribosomal protein S2 OS=Urechis caupo GN=RPS2 PE=2 SV=1|Nr: ref|XP_975415.1| 1e-143 PREDICTED: similar to ribosomal protein S2 [Tribolium castaneum]|Nt: gb|DQ673419.1| 7e-58 Diaphorina citri putative ribosomal protein S2 mRNA, complete cds|Cog: SPCC576.08c 2e-99 --|Kegg: dpo:Dpse_GA19229 1e-131 GA19229-PA; K02981 small subunit ribosomal protein S2e
MergeConsencus4994	7.63336	12.8963	0.572881	20.5294	18.1753	17.9995	0.0158279	2.68708	Swissprot: Q27333 1e-131 NT56_DROME Lethal(2)neighbour of tid protein OS=Drosophila melanogaster GN=l(2)not PE=1 SV=1|Nr: ref|XP_001120233.1| 1e-159 PREDICTED: similar to Lethal(2)neighbour of tid protein 2 (NOT53) [Apis mellifera]|IPR: IPR007873; ALG3|GO: GO:0000030; mannosyltransferase activity; Molecular Function				gi|110767712|ref|XP_001120233.1|/9.32139e154/PREDICTED: similar to Lethal(2)neighbour of tid protein 2 (NOT53) [Apis mellifera]
Contig3535	5.60377	2.0448	0	6.82755	8.47801	5.23886	0.0423996	2.68605	Swissprot: Q15828 2e-06 CYTM_HUMAN Cystatin-M OS=Homo sapiens GN=CST6 PE=1 SV=1|Nr: ref|XP_623207.1| 2e-12 PREDICTED: similar to CG10527-PA isoform 2 [Apis mellifera]
MergeConsencus2093	2.20525	5.80311	0.162351	8.60812	7.0882	6.16856	0.0319229	2.67601	Swissprot: Q9UPQ8 4e-32 TMM15_HUMAN Transmembrane protein 15 OS=Homo sapiens GN=TMEM15 PE=1 SV=1|Nr: ref|XP_001948856.1| 6e-60 PREDICTED: similar to CG8311 CG8311-PA [Acyrthosiphon pisum]|Cog: SPCC63.10c 5e-15 --|Kegg: osa:4328285 9e-16 Os02g0146500; hypothetical protein [EC:2.7.1.108]; K00902 dolichol kinase				gi|193603582|ref|XP_001948856.1|/6.5901e57/PREDICTED: similar to CG8311 CG8311PA [Acyrthosiphon pisum]
MergeConsencus16945	7.22168	9.9678	7.70619	32.2839	15.1889	19.0648	0.0285742	2.67265	Swissprot: O35114 3e-53 SCRB2_MOUSE Lysosome membrane protein 2 OS=Mus musculus GN=Scarb2 PE=1 SV=3|Nr: ref|XP_001660152.1| 6e-76 epithelial membrane protein [Aedes aegypti] gb|EAT48770.1| epithelial membrane protein [Aedes aegypti]|IPR: IPR002159; CD36 antigen|GO: GO:0007155; cell adhesion; Biological Process			GO:0048102//autophagic cell death	gi|157123396|ref|XP_001660152.1|/3.88573e64/epithelial membrane protein [Aedes aegypti]
MergeConsencus25656	0.562777	0.898022	0.217516	1.98847	1.71846	0.771969	0.0446103	2.66868	Swissprot: Q15398 1e-20 DLGP5_HUMAN Disks large-associated protein 5 OS=Homo sapiens GN=DLGAP5 PE=1 SV=2|Nr: ref|XP_002113963.1| 3e-26 hypothetical protein TRIADDRAFT_57926 [Trichoplax adhaerens] gb|EDV23053.1| hypothetical protein TRIADDRAFT_57926 [Trichoplax adhaerens]|IPR: IPR005026; Guanylate-kinase-associated protein	GO:0043231//intracellular membranebounded organelle;GO:0000922//spindle pole	GO:0005488//binding;GO:0016791//phosphatase activity	GO:0000278//mitotic cell cycle	gi|270015239|gb|EFA11687.1|/5.31598e20/hypothetical protein TcasGA2_TC008551 [Tribolium castaneum]
MergeConsencus43642	0.25	0.69	1.54	2.71	2.75	1.19	0.03	2.66626	Swissprot: Q64261 2e-89 CDK6_MOUSE Cell division protein kinase 6 OS=Mus musculus GN=Cdk6 PE=2 SV=2|Nr: gb|EEB10788.1| 2e-98 mitogen-activated protein kinase ERK-A, putative [Pediculus humanus corporis]|IPR: IPR000719; Protein kinase, core
MergeConsencus55013	0.741521	0.871864	0.318447	1.51379	2.31722	1.30302	0.0192224	2.6576	Swissprot: Q68CQ4 1e-165 DEF_HUMAN Digestive organ expansion factor homolog OS=Homo sapiens GN=DEF PE=1 SV=2|Nr: ref|XP_971586.1| 0.0 PREDICTED: similar to digestive organ expansion factor [Tribolium castaneum]|IPR: IPR010678; Protein of unknown function DUF1253				gi|156552653|ref|XP_001603443.1|/0/PREDICTED: similar to conserved hypothetical protein [Nasonia vitripennis]
MergeConsencus21647	17.0669	25.7257	6.41045	47.4574	58.3498	24.7582	0.0377119	2.6536	Nr: ref|XP_001180797.1| 3e-21 PREDICTED: similar to reverse transcriptase-like [Strongylocentrotus purpuratus] ref|XP_001192981.1| PREDICTED: similar to reverse transcriptase-like [Strongylocentrotus purpuratus]				gi|298204333|gb|ADI61815.1|/2.16638e25/endonucleasereverse transcriptase [Bombyx mori]
Contig793	3.51545	4.96007	2.71749	6.95587	13.8419	8.73669	0.0238328	2.63865	Swissprot: P50053 7e-37 KHK_HUMAN Ketohexokinase OS=Homo sapiens GN=KHK PE=1 SV=1|Nr: ref|XP_001089839.1| 6e-36 PREDICTED: ketohexokinase isoform 3 [Macaca mulatta]|Cog: APE0012 6e-09 --|Kegg: mcc:698328 8e-37 KHK; ketohexokinase [EC:2.7.1.3]; K00846 ketohexokinase
MergeConsencus12368	0.8388	1.08487	0.583562	2.72665	1.98164	1.8951	0.00526493	2.63374	Swissprot: Q96BN6 9e-06 F149B_HUMAN Protein FAM149B1 OS=Homo sapiens GN=FAM149B1 PE=2 SV=2
Contig841	5.88368	6.9179	0	11.8794	13.2381	8.54548	0.0267719	2.62959	Nt: dbj|AP006228.1| 3e-18 Mus musculus genomic DNA, chromosome 4, clone:RP23-284M8, complete sequence
MergeConsencus5846	10.8444	14.0172	3.9416	30.7548	22.5413	21.9857	0.00979775	2.61366	Swissprot: Q24572 0.0 CAF1_DROME Probable histone-binding protein Caf1 OS=Drosophila melanogaster GN=Caf1 PE=1 SV=1|Nr: ref|XP_624580.1| 0.0 PREDICTED: similar to Chromatin assembly factor 1 subunit CG4236-PA [Apis mellifera]|IPR: IPR001680; WD40 repeat	GO:0005678//chromatin assembly complex;GO:0070822//Sin3type complex;GO:0031519//PcG protein complex;GO:0031010	GO:0018024//histonelysine Nmethyltransferase activity;GO:0004468//lysine Nacetyltransferase activity;GO:0042623//ATPase activity, coupled;GO:0019899//enzyme binding	GO:0000278//mitotic cell cycle;GO:0006277//DNA amplification;GO:0016458//gene silencing;GO:0048812//neuron projection morphogenesis;GO:0006357//regulation of transcription from RNA polymerase II promoter;GO:0016570//histone modification;GO:0008283//cell p	gi|66534191|ref|XP_624580.1|/0/PREDICTED: similar to Chromatin assembly factor 1 subunit CG4236PA [Apis mellifera]
MergeConsencus10395	56.5383	71.9019	1.09752	132.08	112.036	94.3418	0.0223128	2.61281	Swissprot: P21574 2e-53 YBX2A_XENLA Y-box-binding protein 2-A OS=Xenopus laevis GN=ybx2-A PE=1 SV=2|Nr: ref|XP_393344.3| 7e-79 PREDICTED: similar to ypsilon schachtel CG5654-PA [Apis mellifera]|IPR: IPR002059; Cold-shock protein, DNA-binding	GO:0005681//spliceosomal complex;GO:0016020//membrane	GO:0003723//RNA binding	GO:0000377//RNA splicing, via transesterification reactions with bulged adenosine as nucleophile;GO:0007292//female gamete generation;GO:0006351//transcription, DNAdependent	gi|242008101|ref|XP_002424851.1|/5.95172e43/Y box binding protein, putative [Pediculus humanus corporis]
MergeConsencus13553	2.36672	2.50446	0	4.68292	3.99379	4.01034	0.0183396	2.60451	Swissprot: P21522 4e-30 ROA1_SCHAM Heterogeneous nuclear ribonucleoprotein A1, A2/B1 homolog OS=Schistocerca americana GN=HNRNP PE=2 SV=1|Nr: sp|P21522|ROA1_SCHAM 6e-29 RecName: Full=Heterogeneous nuclear ribonucleoprotein A1, A2/B1 homolog emb|CAA38481.1| mammalian A1, A2 /B1 hnRNP homologue [Schistocerca americana]|Cog: XF0818 1e-06 --|Kegg: mcc:702153 3e-08 LOC702153; similar to keratin 10; K0…
MergeConsencus4078	5.93567	6.80008	0.705898	15.9177	7.53363	11.5192	0.040129	2.60165	Swissprot: P27483 4e-95 GRP1_ARATH Glycine-rich cell wall structural protein OS=Arabidopsis thaliana GN=At3g17050 PE=2 SV=2|Nr: emb|CAD22154.1| 1e-122 pherophorin-dz1 protein [Volvox carteri f. nagariensis]|IPR: IPR002952; Eggshell protein	GO:0031981//nuclear lumen;GO:0005732//small nucleolar ribonucleoprotein complex	GO:0016866//intramolecular transferase activity;GO:0030556//rRNA modification guide activity	GO:0000154//rRNA modification	gi|115699004|ref|XP_780169.2|/3.83329e53/PREDICTED: similar to cortical granule protein with LDLreceptorlike repeats [Strongylocentrotus purpuratus]
MergeConsencus10095	1064.46	1135.27	123.991	1511.73	2249.85	2271.27	0.01975	2.5962	Swissprot: P48594 2e-62 SPB4_HUMAN Serpin B4 OS=Homo sapiens GN=SERPINB4 PE=1 SV=2|Nr: gb|ABV60345.1| 2e-69 putative serine protease inhibitor 4 [Lutzomyia longipalpis]|IPR: IPR000215; Protease inhibitor I4, serpin|GO: GO:0004867; serine-type endopeptidase inhibitor activity; Molecular Function|Cog: MA2246 1e-55 --|Kegg: hsa:462 1e-47 SERPINC1; serpin peptidase inhibitor, clade C (antithrombin), …		GO:0004866//endopeptidase inhibitor activity	GO:0010466//negative regulation of peptidase activity;GO:0010955//negative regulation of protein maturation by peptide bond cleavage	gi|157674499|gb|ABV60345.1|/2.17612e58/putative serine protease inhibitor 4 [Lutzomyia longipalpis]
MergeConsencus9126	0.361501	1.27513	0.978054	2.29913	1.83007	2.65439	0.00904758	2.59442	Swissprot: Q32L19 5e-66 MND1_BOVIN Meiotic nuclear division protein 1 homolog OS=Bos taurus GN=MND1 PE=2 SV=1|Nr: ref|XP_002207609.1| 8e-70 hypothetical protein BRAFLDRAFT_113925 [Branchiostoma floridae] gb|EEA72704.1| hypothetical protein BRAFLDRAFT_113925 [Branchiostoma floridae]|IPR: IPR005647; meiotic nuclear division protein 1|Cog: SPAC13A11.03 8e-31 --		GO:0005488//binding	GO:0009987//cellular process	gi|260809928|ref|XP_002599756.1|/1.03403e61/hypothetical protein BRAFLDRAFT_276718 [Branchiostoma floridae]
MergeConsencus2095	2.0809	1.88205	0	3.39344	4.3218	2.5315	0.0336877	2.58564	Swissprot: Q8BVH9 2e-78 METL6_MOUSE Methyltransferase-like protein 6 OS=Mus musculus GN=Mettl6 PE=2 SV=2|Nr: ref|XP_001813540.1| 9e-92 PREDICTED: similar to conserved hypothetical protein [Tribolium castaneum]|IPR: IPR013217; Methyltransferase type 12|Kegg: gga:420681 4e-78 METTL6; methyltransferase like 6 [EC:2.1.1.-]; K00599		GO:0016741//transferase activity, transferring onecarbon groups		gi|189234109|ref|XP_001813540.1|/3.27422e92/PREDICTED: similar to conserved hypothetical protein [Tribolium castaneum]
MergeConsencus12103	16.9838	32.9133	5.30278	47.4599	61.4271	33.7468	0.0307533	2.58395	Swissprot: Q27367 7e-92 CRQ_DROME Protein croquemort OS=Drosophila melanogaster GN=crq PE=1 SV=2|Nr: ref|XP_002052556.1| 1e-117 GJ17608 [Drosophila virilis] gb|EDW64711.1| GJ17608 [Drosophila virilis]|IPR: IPR002159; CD36 antigen|GO: GO:0007155; cell adhesion; Biological Process	GO:0016020//membrane	GO:0004872//receptor activity	GO:0050896//response to stimulus;GO:0016108;GO:0007165//signal transduction;GO:0048102//autophagic cell death;GO:0006726//eye pigment biosynthetic process	gi|195052466|ref|XP_001993304.1|/1.02167e113/GH13144 [Drosophila grimshawi]
MergeConsencus2385	1.76991	1.24861	0	3.00175	2.38935	2.39925	0.0237637	2.58085	Swissprot: Q7TMK9 2e-99 HNRPQ_MOUSE Heterogeneous nuclear ribonucleoprotein Q OS=Mus musculus GN=Syncrip PE=1 SV=2|Nr: ref|XP_392307.3| 1e-136 PREDICTED: similar to CG17838-PE, isoform E [Apis mellifera]|IPR: IPR000504; RNA recognition motif, RNP-1|GO: GO:0003676; nucleic acid binding; Molecular Function|Cog: SPAC140.02 3e-06 --|Kegg: dme:Dmel_CG31762 3e-09 aret; arrest; K02177 RNA binding protei…	GO:0005681//spliceosomal complex	GO:0046872//metal ion binding;GO:0003723//RNA binding	GO:0000377//RNA splicing, via transesterification reactions with bulged adenosine as nucleophile	gi|195055139|ref|XP_001994478.1|/2.16373e131/GH17270 [Drosophila grimshawi]
MergeConsencus16057	3.516	4.88568	2.59437	10.1644	10.428	7.76315	0.00290667	2.5787	Swissprot: Q63699 1e-113 CDK2_RAT Cell division protein kinase 2 OS=Rattus norvegicus GN=Cdk2 PE=2 SV=1|Nr: ref|XP_393450.3| 1e-114 PREDICTED: similar to cyclin-dependent kinase 2 [Apis mellifera]|IPR: IPR000719; Protein kinase, core	GO:0031981//nuclear lumen;GO:0044427//chromosomal part;GO:0043234//protein complex;GO:0042598//vesicular fraction;GO:0044444//cytoplasmic part;GO:0000803	GO:0005515//protein binding;GO:0004674//protein serine/threonine kinase activity;GO:0032559//adenyl ribonucleotide binding	GO:0000080//G1 phase of mitotic cell cycle;GO:0032868//response to insulin stimulus;GO:0030001//metal ion transport;GO:0010557//positive regulation of macromolecule biosynthetic process;GO:0008283//cell proliferation;GO:0043627//response to estrogen stimu	gi|110761543|ref|XP_393450.3|/6.97563e113/PREDICTED: similar to cyclindependent kinase 2 [Apis mellifera]
Contig4899	2.96011	7.27727	1.87216	10.2688	7.56837	13.3755	0.0268905	2.57753	Swissprot: Q962Q7 3e-77 RS23_SPOFR 40S ribosomal protein S23 OS=Spodoptera frugiperda GN=RpS23 PE=2 SV=1|Nr: gb|ABD98760.1| 7e-77 putative ribosomal protein S23e [Graphocephala atropunctata]|Nt: gb|DQ673403.1| 3e-59 Diaphorina citri putative ribosomal protein S23e mRNA, complete cds|Cog: YPR132w 3e-61 --|Kegg: dpo:Dpse_GA21060 1e-76 GA21060-PA; K02973 small subunit ribosomal protein S23e
MergeConsencus33713	17.0685	11.8051	1.21962	18.0418	26.1402	33.2158	0.0346769	2.57193	Swissprot: Q9HCB6 3e-18 SPON1_HUMAN Spondin-1 OS=Homo sapiens GN=SPON1 PE=1 SV=2|Nr: gb|EEC16558.1| 3e-36 F-spondin, putative [Ixodes scapularis]|IPR: IPR000884; Thrombospondin, type I				gi|241705268|ref|XP_002413250.1|/1.92947e34/Fspondin, putative [Ixodes scapularis]
MergeConsencus18648	17.4405	20.4492	12.2459	50.3938	39.3497	38.9107	0.00209798	2.56612	Swissprot: Q9V3D5 1e-163 DYRK2_DROME Dual specificity tyrosine-phosphorylation-regulated kinase 2 OS=Drosophila melanogaster GN=smi35A PE=1 SV=1|Nr: gb|EEB17394.1| 0.0 mitogen-activated protein kinase ERK-A, putative [Pediculus humanus corporis]|IPR: IPR000719; Protein kinase, core	GO:0044444//cytoplasmic part	GO:0004672//protein kinase activity;GO:0032559//adenyl ribonucleotide binding	GO:0006464//protein modification process;GO:0007635//chemosensory behavior	gi|242019366|ref|XP_002430132.1|/0/mitogenactivated protein kinase ERKA, putative [Pediculus humanus corporis]
MergeConsencus50122	40.0461	19.1884	1.35858	36.7268	56.7731	61.9718	0.0401193	2.56583	Nr: gb|EEB14879.1| 7e-56 conserved hypothetical protein [Pediculus humanus corporis]				gi|242013857|ref|XP_002427617.1|/3.30595e49/conserved hypothetical protein [Pediculus humanus corporis]
MergeConsencus4503	1.16101	3.46522	0.276145	4.79642	4.32023	3.43015	0.0344526	2.55933	Swissprot: Q5R652 1e-22 RAD17_PONAB Cell cycle checkpoint protein RAD17 OS=Pongo abelii GN=RAD17 PE=2 SV=1|Nr: emb|CAG32020.1| 2e-27 hypothetical protein [Gallus gallus]|IPR: IPR004582; Checkpoint protein Rad24|GO: GO:0005634; nucleus; Cellular Component			GO:0009987//cellular process	gi|53133382|emb|CAG32020.1|/8.31272e28/hypothetical protein [Gallus gallus]
MergeConsencus14601	2.99127	2.74771	0.794849	7.13415	5.15287	4.43505	0.0166359	2.5593	Swissprot: P23258 0.0 TBG1_HUMAN Tubulin gamma-1 chain OS=Homo sapiens GN=TUBG1 PE=1 SV=2|Nr: ref|XP_001601917.1| 0.0 PREDICTED: similar to LOC495938 protein [Nasonia vitripennis]|IPR: IPR000217; Tubulin	GO:0000228//nuclear chromosome;GO:0005874//microtubule;GO:0000922//spindle pole;GO:0005813//centrosome	GO:0017111//nucleosidetriphosphatase activity;GO:0032561//guanyl ribonucleotide binding;GO:0005198//structural molecule activity	GO:0043623//cellular protein complex assembly;GO:0007051//spindle organization	gi|156542283|ref|XP_001601917.1|/0/PREDICTED: similar to LOC495938 protein [Nasonia vitripennis]
MergeConsencus25799	0.615469	0.930413	0.679664	2.11251	1.28587	2.28444	0.0116929	2.55345	Swissprot: Q802T2 1e-134 ALG6_CHICK Dolichyl pyrophosphate Man9GlcNAc2 alpha-1,3-glucosyltransferase OS=Gallus gallus GN=ALG6 PE=2 SV=1|Nr: ref|XP_796240.2| 1e-140 PREDICTED: similar to Alg6-prov protein, partial [Strongylocentrotus purpuratus] ref|XP_001182990.1| PREDICTED: similar to Alg6-prov protein, partial [Strongylocentrotus purpuratus]|IPR: IPR004856; ALG6, ALG8 glycosyltransferase|Kegg: …	GO:0044464//cell part	GO:0016758//transferase activity, transferring hexosyl groups	GO:0006487//protein amino acid Nlinked glycosylation	gi|115634667|ref|XP_796240.2|/1.95666e133/PREDICTED: similar to Alg6prov protein, partial [Strongylocentrotus purpuratus]
MergeConsencus22817	1.14489	2.42304	0	2.91258	3.09115	3.10396	0.029141	2.55266	Swissprot: Q17P98 7e-45 MED28_AEDAE Mediator of RNA polymerase II transcription subunit 28 OS=Aedes aegypti GN=MED28 PE=3 SV=1|Nr: gb|EEB18341.1| 4e-64 mediator of RNA polymerase II transcription subunit, putative [Pediculus humanus corporis]|Cog: YBR112c 3e-09 --|Kegg: cfa:486558 1e-12 MLL2, LOC486558; myeloid/lymphoid or mixed-lineage leukemia 2; K09187 myeloid/lymphoid or mixed-lineage leukemi…	GO:0043234//protein complex;GO:0043231//intracellular membranebounded organelle	GO:0016251//general RNA polymerase II transcription factor activity	GO:0006355//regulation of transcription, DNAdependent	gi|189234764|ref|XP_001815546.1|/2.3734e49/PREDICTED: similar to mediator complex [Tribolium castaneum]
MergeConsencus3841	2.40509	2.3928	0.57205	6.53688	2.70569	4.38885	0.0475273	2.53847	Swissprot: Q9VTP4 3e-57 R10AB_DROME 60S ribosomal protein L10a-2 OS=Drosophila melanogaster GN=RpL10Ab PE=1 SV=2|Nr: emb|CAJ17257.1| 3e-60 ribosomal protein L10Ae [Cicindela littoralis]|IPR: IPR002143; Ribosomal protein L1|GO: GO:0003735; structural constituent of ribosome; Molecular Function	GO:0030529//ribonucleoprotein complex	GO:0003676//nucleic acid binding;GO:0005198//structural molecule activity	GO:0010467//gene expression	gi|70909669|emb|CAJ17257.1|/1.26312e48/ribosomal protein L10Ae [Cicindela littoralis]
MergeConsencus5713	16.7823	10.3146	0.589677	14.42	29.3924	26.2827	0.0486131	2.53174	Swissprot: Q9W770 7e-80 SPON1_CHICK Spondin-1 OS=Gallus gallus GN=SPON1 PE=2 SV=1|Nr: ref|XP_320234.3| 1e-130 AGAP012307-PA [Anopheles gambiae str. PEST] gb|EAA00346.3| AGAP012307-PA [Anopheles gambiae str. PEST]|IPR: IPR000884; Thrombospondin, type I				gi|118792262|ref|XP_320234.3|/1.01016e128/AGAP012307PA [Anopheles gambiae str. PEST]
MergeConsencus2733	5.71519	8.04172	0.217274	13.3741	7.27272	14.7116	0.0470033	2.53026	Swissprot: P49585 8e-99 PCY1A_HUMAN Choline-phosphate cytidylyltransferase A OS=Homo sapiens GN=PCYT1A PE=1 SV=2|Nr: ref|XP_395764.2| 1e-146 PREDICTED: similar to CTP:phosphocholine cytidylyltransferase 1 CG1049-PA, isoform A [Apis mellifera]|IPR: IPR004820; Cytidylyltransferase|GO: GO:0009058; biosynthetic process; Biological Process	GO:0043231//intracellular membranebounded organelle	GO:0070567	GO:0016192//vesiclemediated transport;GO:0007472//wing disc morphogenesis;GO:0007423//sensory organ development;GO:0046470//phosphatidylcholine metabolic process;GO:0010259//multicellular organismal aging;GO:0007292//female gamete generation;GO:0001736//e	gi|66509679|ref|XP_395764.2|/1.02814e144/PREDICTED: similar to CTP:phosphocholine cytidylyltransferase 1 CG1049PA, isoform A [Apis mellifera]
MergeConsencus29383	4.66583	4.74629	3.40411	10.0026	9.84922	12.555	0.0013136	2.52858	Swissprot: Q8TEQ8 1e-134 PIGO_HUMAN GPI ethanolamine phosphate transferase 3 OS=Homo sapiens GN=PIGO PE=2 SV=3|Nr: gb|EEB14273.1| 0.0 GPI ethanolamine phosphate transferase, putative [Pediculus humanus corporis]|IPR: IPR002591; Type I phosphodiesterase/nucleotide pyrophosphatase/phosphate transferase				gi|242012584|ref|XP_002427011.1|/0/GPI ethanolamine phosphate transferase, putative [Pediculus humanus corporis]
MergeConsencus38743	4.54803	3.40294	0	4.86958	7.28709	7.94003	0.0353376	2.52758	Swissprot: Q4V8T0 7e-27 MIOX_DANRE Inositol oxygenase OS=Danio rerio GN=miox PE=2 SV=1|Nr: gb|EEB19265.1| 5e-28 Inositol oxygenase, putative [Pediculus humanus corporis]|IPR: IPR007828; Protein of unknown function DUF706|Kegg: dre:571850 2e-26 zgc:114168; zgc:114168 [EC:1.13.99.1]; K00469 inositol oxygenase		GO:0046872//metal ion binding;GO:0016491//oxidoreductase activity	GO:0008152//metabolic process	gi|242023158|ref|XP_002432003.1|/2.18138e28/Inositol oxygenase, putative [Pediculus humanus corporis]
MergeConsencus27595	0.56	1.32	0.19	2.49	1.8	0.91	0.02	2.52	Swissprot: O15995 5e-86 CCNE_HEMPU G1/S-specific cyclin-E OS=Hemicentrotus pulcherrimus GN=CYCE PE=2 SV=1|Nr: ref|XP_394802.1| 9e-92 PREDICTED: similar to G1/S-specific cyclin-E (DmCycE) [Apis mellifera]|IPR: IPR006670; Cyclin
MergeConsencus17879	29.2316	26.6183	1.44232	60.8279	38.6225	44.6842	0.0295108	2.51578	Swissprot: Q9JLH7 2e-94 CK5P3_RAT CDK5 regulatory subunit-associated protein 3 OS=Rattus norvegicus GN=Cdk5rap3 PE=1 SV=1|Nr: ref|XP_001601756.1| 1e-125 PREDICTED: similar to conserved hypothetical protein [Nasonia vitripennis]|IPR: IPR008491; Protein of unknown function DUF773|Kegg: sce:YIR019C 2e-07 MUC1, STA4, FLO11; GPI-anchored cell surface glycoprotein (flocculin) required for pseudohyphal …		GO:0005515//protein binding	GO:0007399//nervous system development	gi|156540702|ref|XP_001601756.1|/7.5372e118/PREDICTED: similar to conserved hypothetical protein [Nasonia vitripennis]
MergeConsencus2866	3.73624	3.46558	0.192544	6.74734	6.30482	5.53372	0.0176319	2.51352	Swissprot: Q9JJZ1 4e-06 GTR8_RAT Solute carrier family 2, facilitated glucose transporter member 8 OS=Rattus norvegicus GN=Slc2a8 PE=1 SV=1|Nr: ref|XP_624322.1| 9e-10 PREDICTED: similar to CG10960-PB, isoform B [Apis mellifera]|Kegg: rno:85256 9e-06 Slc2a8; solute carrier family 2, (facilitated glucose transporter) member 8; K08145 MFS transporter, SP family, solute carrier family 2, (facilitated…				gi|66558353|ref|XP_624322.1|/3.68797e10/PREDICTED: similar to CG10960PB, isoform B [Apis mellifera]
MergeConsencus11728	6.0175	8.16374	2.05744	16.0281	13.6694	11.1115	0.0115143	2.51307	Swissprot: P49005 1e-111 DPOD2_HUMAN DNA polymerase delta subunit 2 OS=Homo sapiens GN=POLD2 PE=1 SV=1|Nr: ref|XP_001658442.1| 1e-122 DNA polymerase delta small subunit [Aedes aegypti] gb|EAT40754.1| DNA polymerase delta small subunit [Aedes aegypti]|IPR: IPR000194; ATPase, F1/V1/A1 complex, alpha/beta subunit, nucleotide-binding	GO:0031981//nuclear lumen	GO:0005488//binding;GO:0016740//transferase activity	GO:0006259//DNA metabolic process	gi|157116366|ref|XP_001658442.1|/4.2405e114/DNA polymerase delta small subunit [Aedes aegypti]
MergeConsencus11253	26.5992	30.3956	18.0016	65.9771	63.9334	58.2854	0.000476701	2.5094	Swissprot: Q13162 1e-97 PRDX4_HUMAN Peroxiredoxin-4 OS=Homo sapiens GN=PRDX4 PE=1 SV=1|Nr: gb|ABZ80828.1| 1e-102 peroxiredoxin [Penaeus monodon]|IPR: IPR000866; Alkyl hydroperoxide reductase/ Thiol specific antioxidant/ Mal allergen		GO:0016705//oxidoreductase activity, acting on paired donors, with incorporation or reduction of molecular oxygen;GO:0016209//antioxidant activity	GO:0008152//metabolic process;GO:0019725//cellular homeostasis	gi|67083289|gb|AAY66580.1|/1.46465e99/thioredoxin peroxidase [Ixodes scapularis]
MergeConsencus7928	1.23599	3.21792	0.204736	4.86626	3.77414	3.0418	0.0428129	2.50764	Nr: gb|EEB18728.1| 1e-34 hypothetical protein Phum_PHUM530130 [Pediculus humanus corporis]
MergeConsencus42653	9.42387	6.33164	1.63535	17.3962	10.169	15.8598	0.0256892	2.497	Nr: gb|AAX14951.1| 2e-06 arylphorin hexamerin-like protein 2 [Romalea microptera]				gi|60256959|gb|AAX14951.1|/6.6272e07/arylphorin hexamerinlike protein 2 [Romalea microptera]
MergeConsencus7297	72.6116	94.3665	1.77916	138.511	131.551	149.29	0.0212198	2.48494	Swissprot: P49257 1e-118 LMAN1_HUMAN Protein ERGIC-53 OS=Homo sapiens GN=LMAN1 PE=1 SV=2|Nr: ref|XP_971530.1| 0.0 PREDICTED: similar to AGAP005404-PA [Tribolium castaneum]|IPR: IPR005052; Legume-like lectin				gi|91085965|ref|XP_971530.1|/0/PREDICTED: similar to AGAP005404PA [Tribolium castaneum]
MergeConsencus8008	6.01533	3.53635	0.31704	10.627	5.84437	8.03069	0.0430333	2.4828	Swissprot: Q9U1N0 2e-84 HRP65_CHITE Hrp65 protein OS=Chironomus tentans GN=HRP65 PE=1 SV=1|Nr: ref|XP_001121935.1| 1e-102 PREDICTED: similar to no on or off transient A CG4211-PB, isoform B [Apis mellifera]|IPR: IPR012975; NOPS|Kegg: mmu:381022 6e-10 Mll2; myeloid/lymphoid or mixed-lineage leukemia 2; K09187 myeloid/lymphoid or mixed-lineage leukemia protein 2
MergeConsencus1016	6.23215	7.11461	5.51774	15.1581	14.6743	16.9864	0.00018957	2.48184	Swissprot: Q6PZE0 7e-16 MUC19_MOUSE Mucin-19 OS=Mus musculus GN=Muc19 PE=2 SV=2|Nr: ref|XP_001568167.1| 3e-37 proteophosphoglycan ppg4 [Leishmania braziliensis MHOM/BR/75/M2904] emb|CAM43271.1| proteophosphoglycan ppg4 [Leishmania braziliensis]|Cog: Cgl1939 3e-09 --|Kegg: sce:YIR019C 4e-13 MUC1, STA4, FLO11; GPI-anchored cell surface glycoprotein (flocculin) required for pseudohyphal formation, i…
MergeConsencus13908	9.55868	11.5517	1.93905	24.1184	20.3096	12.7514	0.0312938	2.48073	Swissprot: Q9UIG8 1e-81 SO3A1_HUMAN Solute carrier organic anion transporter family member 3A1 OS=Homo sapiens GN=SLCO3A1 PE=2 SV=2|Nr: ref|XP_001601987.1| 0.0 PREDICTED: similar to CG7571-PA [Nasonia vitripennis]|IPR: IPR001680; WD40 repeat		GO:0005215//transporter activity	GO:0006810//transport	gi|156541644|ref|XP_001601987.1|/0/PREDICTED: similar to CG7571PA [Nasonia vitripennis]
MergeConsencus18623	52.8764	92.4029	23.0016	174.374	162.126	80.3449	0.0405531	2.47708	Swissprot: Q9D3D0 8e-27 TTPAL_MOUSE Alpha-tocopherol transfer protein-like OS=Mus musculus GN=Ttpal PE=2 SV=3|Nr: ref|XP_001604950.1| 4e-71 PREDICTED: similar to ENSANGP00000019247 [Nasonia vitripennis]|IPR: IPR001071; Cellular retinaldehyde binding/alpha-tocopherol transport		GO:0019840//isoprenoid binding	GO:0006726//eye pigment biosynthetic process;GO:0007165//signal transduction	gi|156555574|ref|XP_001604950.1|/1.74499e71/PREDICTED: similar to ENSANGP00000019247 [Nasonia vitripennis]
MergeConsencus2246	1.05874	1.45231	0.54561	3.49146	2.18361	1.89366	0.0270631	2.47615	Swissprot: P47823 1e-130 EI2BE_RABIT Translation initiation factor eIF-2B subunit epsilon OS=Oryctolagus cuniculus GN=EIF2B5 PE=1 SV=1|Nr: ref|XP_972918.1| 1e-147 PREDICTED: similar to translation initiation factor eIF-2B subunit epsilon [Tribolium castaneum]|IPR: IPR001451; Bacterial transferase hexapeptide repeat	GO:0044424//intracellular part	GO:0005515//protein binding	GO:0051716//cellular response to stimulus;GO:0010033//response to organic substance;GO:0006417//regulation of translation;GO:0006950//response to stress;GO:0007399//nervous system development	gi|91081755|ref|XP_972918.1|/4.1924e136/PREDICTED: similar to translation initiation factor eIF2B subunit epsilon [Tribolium castaneum]
MergeConsencus13386	6.91815	12.0648	2.29704	20.2114	14.2598	18.2002	0.0172074	2.47516	Swissprot: P54960 0.0 HMDH_BLAGE 3-hydroxy-3-methylglutaryl-coenzyme A reductase OS=Blattella germanica PE=2 SV=1|Nr: sp|P54960|HMDH_BLAGE 0.0 RecName: Full=3-hydroxy-3-methylglutaryl-coenzyme A reductase; Short=HMG-CoA reductase emb|CAA49628.1| hydroxymethylglutaryl-CoA reductase (NADPH) [Blattella germanica]|IPR: IPR000731; Sterol-sensing 5TM box	GO:0016020//membrane;GO:0043231//intracellular membranebounded organelle;GO:0042598//vesicular fraction	GO:0016616//oxidoreductase activity, acting on the CHOH group of donors, NAD or NADP as acceptor;GO:0042802//identical protein binding	GO:0008203//cholesterol metabolic process;GO:0007632//visual behavior;GO:0043405//regulation of MAP kinase activity;GO:0045844//positive regulation of striated muscle tissue development;GO:0031667//response to nutrient levels;GO:0008299//isoprenoid biosyn	gi|1708251|sp|P54960.1|HMDH_BLAGE/0/RecName: Full=3hydroxy3methylglutarylcoenzyme A reductase; Short=HMGCoA reductase
MergeConsencus16833	1.58237	2.5761	0.376367	3.2686	4.92964	3.02504	0.031551	2.4749	Swissprot: P48809 4e-50 RB27C_DROME Heterogeneous nuclear ribonucleoprotein 27C OS=Drosophila melanogaster GN=Hrb27C PE=1 SV=2|Nr: ref|XP_001951157.1| 4e-92 PREDICTED: similar to hnRNPA/B-like protein [Acyrthosiphon pisum]|Cog: Rv0171 2e-07 --|Kegg: gga:395568 5e-21 COL5A1; collagen, type V, alpha 1; K06236 collagen, type I/II/III/V/XI, alpha	GO:0032991//macromolecular complex	GO:0005488//binding		gi|193580163|ref|XP_001951157.1|/6.13535e14/PREDICTED: similar to hnRNPA/Blike protein [Acyrthosiphon pisum]
MergeConsencus18507	2.4417	0.645951	1.13247	4.31364	2.6782	3.44782	0.0220342	2.47378	Swissprot: Q8MSS1 1e-49 LVA_DROME Protein lava lamp OS=Drosophila melanogaster GN=lva PE=1 SV=2|Nr: ref|XP_001120525.1| 5e-66 PREDICTED: similar to lava lamp CG6450-PC [Apis mellifera]|Cog: aq_1006 4e-22 --|Kegg: tva:TVAG_387410 1e-38 viral A-type inclusion protein, putative [EC:2.7.7.7]; K02331 DNA polymerase phi subunit				gi|110749011|ref|XP_001120525.1|/5.91505e49/PREDICTED: similar to lava lamp CG6450PC [Apis mellifera]
Contig2818	1047.7	1396.51	32.4045	1641.67	2081.03	2399.64	0.0295017	2.47206	Swissprot: Q8TKL5 3e-29 Y3388_METAC Uncharacterized serpin-like protein MA_3388 OS=Methanosarcina acetivorans GN=MA_3388 PE=3 SV=1|Nr: ref|XP_973349.2| 4e-35 PREDICTED: similar to serpin 5, partial [Tribolium castaneum]|Cog: MA3388 1e-29 --|Kegg: dre:321545 8e-22 serpinc1; serine (or cysteine) proteinase inhibitor, clade C (antithrombin), member 1; K03911 antithrombin III
MergeConsencus11776	2.27401	1.33687	1.51813	4.82089	4.41877	3.38619	0.00415458	2.46165	Swissprot: P52875 2e-83 TM165_MOUSE Transmembrane protein 165 OS=Mus musculus GN=Tmem165 PE=2 SV=2|Nr: ref|XP_001605345.1| 5e-99 PREDICTED: similar to conserved hypothetical protein [Nasonia vitripennis]|IPR: IPR001727; Protein of unknown function UPF0016|GO: GO:0016020; membrane; Cellular Component|Cog: alr1698 2e-46 --	GO:0044464//cell part			gi|156554528|ref|XP_001605345.1|/3.39495e91/PREDICTED: similar to conserved hypothetical protein [Nasonia vitripennis]
MergeConsencus18608	4.56514	7.15679	1.307	13.382	10.4616	8.213	0.0242154	2.46042	Swissprot: Q641W4 1e-141 RFC2_RAT Replication factor C subunit 2 OS=Rattus norvegicus GN=Rfc2 PE=2 SV=1|Nr: ref|XP_001841875.1| 1e-140 replication factor C subunit 2 [Culex quinquefasciatus] gb|EDS31728.1| replication factor C subunit 2 [Culex quinquefasciatus]|IPR: IPR003593; AAA+ ATPase, core	GO:0031981//nuclear lumen;GO:0005657//replication fork	GO:0003677//DNA binding;GO:0016462//pyrophosphatase activity;GO:0032559//adenyl ribonucleotide binding	GO:0006259//DNA metabolic process;GO:0009207	gi|158285610|ref|XP_308395.4|/2.09139e140/AGAP007477PA [Anopheles gambiae str. PEST]
MergeConsencus14428	2.90744	4.44406	3.82073	7.80741	11.4479	8.21096	0.00586401	2.45844	Swissprot: Q06609 1e-159 RAD51_HUMAN DNA repair protein RAD51 homolog 1 OS=Homo sapiens GN=RAD51 PE=1 SV=1|Nr: ref|XP_001845458.1| 1e-159 DNA repair protein RAD51 [Culex quinquefasciatus] gb|EDS40393.1| DNA repair protein RAD51 [Culex quinquefasciatus]|IPR: IPR000445; Helix-hairpin-helix motif	GO:0016604//nuclear body;GO:0000795//synaptonemal complex;GO:0044444//cytoplasmic part	GO:0008094//DNAdependent ATPase activity;GO:0005515//protein binding;GO:0032559//adenyl ribonucleotide binding;GO:0043566//structurespecific DNA binding	GO:0042221//response to chemical stimulus;GO:0006261//DNAdependent DNA replication;GO:0000725//recombinational repair;GO:0009207;GO:0051054//positive regulation of DNA metabolic process;GO:0051259//protein oligomerization;GO:0022403	gi|256071033|ref|XP_002571846.1|/5.56179e143/DNA repair protein RAD51 [Schistosoma mansoni]
MergeConsencus5801	2.77388	6.25668	3.80712	11.6012	11.7181	8.18547	0.00800366	2.45408	Swissprot: Q9JIF3 7e-29 GTR8_MOUSE Solute carrier family 2, facilitated glucose transporter member 8 OS=Mus musculus GN=Slc2a8 PE=2 SV=1|Nr: ref|XP_002015880.1| 2e-41 GL10779 [Drosophila persimilis] gb|EDW31770.1| GL10779 [Drosophila persimilis]|IPR: IPR005828; General substrate transporter	GO:0044425//membrane part	GO:0015151//alphaglucoside transmembrane transporter activity	GO:0015766;GO:0000017//alphaglucoside transport	gi|298204347|gb|ADI61822.1|/4.3992e31/endonucleasereverse transcriptase [Bombyx mori]
MergeConsencus5295	3.7508	3.34099	0.351443	6.82717	6.71298	4.68646	0.0240535	2.44875	Swissprot: Q8QZZ7 3e-28 TPRKB_MOUSE TP53RK-binding protein OS=Mus musculus GN=Tprkb PE=2 SV=1|Nr: gb|EEB16891.1| 2e-38 CAAX-protease, putative [Pediculus humanus corporis]|IPR: IPR013926; Kinase binding protein CGI-121				gi|242018327|ref|XP_002429629.1|/7.86441e39/CAAXprotease, putative [Pediculus humanus corporis]
MergeConsencus11348	6.66671	3.65084	0.953034	9.87398	11.4554	6.24147	0.0369916	2.44627	Nr: ref|XP_001949009.1| 2e-10 PREDICTED: similar to AGAP003198-PA, partial [Acyrthosiphon pisum]				gi|270015247|gb|EFA11695.1|/3.56426e12/hypothetical protein TcasGA2_TC002152 [Tribolium castaneum]
Contig5328	6.18933	4.11324	1.04009	11.0295	9.08205	7.59973	0.01922	2.4431	Swissprot: P48597 1e-69 IF4E_XENLA Eukaryotic translation initiation factor 4E OS=Xenopus laevis GN=eif4e PE=1 SV=1|Nr: ref|XP_624290.2| 2e-80 PREDICTED: similar to eukaryotic translation initiation factor 4E [Apis mellifera]|Cog: YOL139c 4e-35 --|Kegg: dpo:Dpse_GA17897 1e-70 GA17897-PA; K03259 translation initiation factor eIF-4E
MergeConsencus11822	0.651855	1.10707	0.0559879	1.7402	1.7111	0.981821	0.0451668	2.4426	Swissprot: Q8CHB8 6e-26 TTLL5_MOUSE Tubulin polyglutamylase TTLL5 OS=Mus musculus GN=Ttll5 PE=2 SV=3|Nr: ref|XP_971803.1| 1e-150 PREDICTED: similar to conserved hypothetical protein [Tribolium castaneum]|IPR: IPR004344; Tubulin-tyrosine ligase|GO: GO:0004835; tubulin-tyrosine ligase activity; Molecular Function				gi|91083483|ref|XP_971803.1|/1.28729e150/PREDICTED: similar to conserved hypothetical protein [Tribolium castaneum]
MergeConsencus16688	0.981318	0.944027	0.344804	2.26951	1.00361	2.26747	0.040453	2.44063	Swissprot: P49696 0.0 SYVC_FUGRU Valyl-tRNA synthetase OS=Fugu rubripes GN=vars PE=3 SV=1|Nr: gb|EEB18877.1| 0.0 Valyl-tRNA synthetase, putative [Pediculus humanus corporis]|IPR: IPR001412; Aminoacyl-tRNA synthetase, class I, conserved site	GO:0044424//intracellular part	GO:0004812//aminoacyltRNA ligase activity;GO:0032559//adenyl ribonucleotide binding	GO:0006418//tRNA aminoacylation for protein translation	gi|242022374|ref|XP_002431615.1|/0/ValyltRNA synthetase, putative [Pediculus humanus corporis]
MergeConsencus4412	94.9834	189.578	32.469	272.126	240.235	261.095	0.0154851	2.43969	Swissprot: P55157 2e-78 MTP_HUMAN Microsomal triglyceride transfer protein large subunit OS=Homo sapiens GN=MTTP PE=1 SV=1|Nr: gb|EEB12549.1| 0.0 Microsomal triglyceride transfer protein large subunit precursor, putative [Pediculus humanus corporis]|IPR: IPR001747; Lipid transport protein, N-terminal				gi|242009012|ref|XP_002425287.1|/0/Microsomal triglyceride transfer protein large subunit precursor, putative [Pediculus humanus corporis]
MergeConsencus18197	3.13195	2.36731	1.21052	6.00735	5.53677	4.80157	0.00411049	2.4361	Swissprot: Q969F1 9e-10 TF3C6_HUMAN General transcription factor 3C polypeptide 6 OS=Homo sapiens GN=GTF3C6 PE=1 SV=1|Nr: ref|NP_001085594.1| 2e-11 MGC82567 protein [Xenopus laevis] gb|AAH72993.1| MGC82567 protein [Xenopus laevis]				gi|148225168|ref|NP_001085594.1|/5.63066e07/general transcription factor IIIC, polypeptide 6, alpha 35kDa [Xenopus laevis]
MergeConsencus13501	622.316	993.06	178.695	1685.6	1349.62	1334.66	0.0152558	2.43573	Swissprot: P27118 1e-111 DCOR_CHICK Ornithine decarboxylase (Fragment) OS=Gallus gallus GN=ODC1 PE=2 SV=1|Nr: ref|XP_393529.3| 0.0 PREDICTED: similar to Ornithine decarboxylase (ODC) [Apis mellifera]|IPR: IPR000183; Orn/DAP/Arg decarboxylase 2		GO:0016831//carboxylyase activity		gi|110748906|ref|XP_393529.3|/0/PREDICTED: similar to Ornithine decarboxylase (ODC) [Apis mellifera]
MergeConsencus72094	463.17	747.763	4.8176	1128.65	883.091	944.353	0.0320886	2.4315	Swissprot: P54399 3e-70 PDI_DROME Protein disulfide-isomerase OS=Drosophila melanogaster GN=Pdi PE=2 SV=1|Nr: ref|XP_975184.2| 5e-87 PREDICTED: similar to AGAP012407-PA [Tribolium castaneum]|IPR: IPR006662; Thioredoxin-related		GO:0016740//transferase activity		gi|189235323|ref|XP_975184.2|/1.98436e87/PREDICTED: similar to AGAP012407PA [Tribolium castaneum]
Contig5289	16.5092	29.6144	1.47251	48.4605	38.5738	28.6916	0.0421013	2.43142	Swissprot: Q58DQ3 1e-61 RL6_BOVIN 60S ribosomal protein L6 OS=Bos taurus GN=RPL6 PE=2 SV=3|Nr: gb|EEB12946.1| 1e-103 60S ribosomal protein L6, putative [Pediculus humanus corporis]|Cog: YML073c 2e-30 --|Kegg: dme:Dmel_CG11522 6e-71 RpL6; Ribosomal protein L6; K02934 large subunit ribosomal protein L6e
MergeConsencus17523	14.662	36.9519	8.57433	61.2655	52.7825	32.1176	0.0394592	2.42847	Swissprot: Q6TYB5 7e-60 FEZ2_MOUSE Fasciculation and elongation protein zeta-2 OS=Mus musculus GN=Fez2 PE=2 SV=1|Nr: ref|XP_975626.1| 1e-149 PREDICTED: similar to AGAP003014-PA [Tribolium castaneum]|IPR: IPR011680; FEZ-like|Cog: DRA0210 3e-06 --|Kegg: sce:YIR019C 1e-10 MUC1, STA4, FLO11; GPI-anchored cell surface glycoprotein (flocculin) required for pseudohyphal formation, invasive growth, flocc…		GO:0008092//cytoskeletal protein binding	GO:0006909//phagocytosis	gi|91081223|ref|XP_975626.1|/1.94984e134/PREDICTED: similar to AGAP003014PA [Tribolium castaneum]
MergeConsencus25421	0.778829	0.801263	0.526788	1.92629	1.5333	1.64963	0.00118674	2.42502	Swissprot: Q9UHJ3 1e-104 SMBT1_HUMAN Scm-like with four MBT domains protein 1 OS=Homo sapiens GN=SFMBT1 PE=2 SV=2|Nr: ref|XP_414254.1| 1e-107 PREDICTED: similar to Scm-like with four mbt domains 1 [Gallus gallus]|IPR: IPR004092; Mbt repeat				gi|301604537|ref|XP_002931917.1|/7.59957e105/PREDICTED: scmlike with four MBT domains protein 2like [Xenopus (Silurana) tropicalis]
Contig426	15.6433	41.9916	13.6895	60.9041	76.7026	35.3427	0.0442588	2.42483	Nt: gb|AC125191.4| 7e-11 Mus musculus BAC clone RP23-262C22 from 16, complete sequence
MergeConsencus1857	0.959978	1.15842	0.292924	2.67782	1.421	1.7408	0.0337657	2.42175	Swissprot: O14981 0.0 BTAF1_HUMAN TATA-binding protein-associated factor 172 OS=Homo sapiens GN=BTAF1 PE=1 SV=2|Nr: ref|XP_966659.1| 0.0 PREDICTED: similar to TATA-binding protein-associated factor 172 [Tribolium castaneum]|IPR: IPR000330; SNF2-related		GO:0005488//binding		gi|91088413|ref|XP_966659.1|/0/PREDICTED: similar to TATAbinding proteinassociated factor 172 [Tribolium castaneum]
MergeConsencus13631	1.50383	2.41115	0.10568	3.86437	2.46079	3.3976	0.0366175	2.4182	Swissprot: Q794E4 2e-42 HNRPF_RAT Heterogeneous nuclear ribonucleoprotein F OS=Rattus norvegicus GN=Hnrnpf PE=1 SV=3|Nr: ref|XP_001600558.1| 6e-61 PREDICTED: similar to FTP3 [Nasonia vitripennis]|IPR: IPR000504; RNA recognition motif, RNP-1|GO: GO:0003676; nucleic acid binding; Molecular Function	GO:0031981//nuclear lumen	GO:0003723//RNA binding;GO:0005515//protein binding	GO:0008380//RNA splicing	gi|156550801|ref|XP_001600558.1|/3.37135e61/PREDICTED: similar to FTP3 [Nasonia vitripennis]
MergeConsencus36108	7.08552	8.331	6.66788	18.069	19.0613	16.1823	0.000223323	2.41404	Swissprot: Q2KJG3 3e-26 SYNC_BOVIN Asparaginyl-tRNA synthetase, cytoplasmic OS=Bos taurus GN=NARS PE=2 SV=3|Nr: ref|XP_001606841.1| 9e-26 PREDICTED: similar to BcDNA.GH06451 [Nasonia vitripennis]|Cog: SPBC1773.10c 2e-19 --|Kegg: gga:426856 5e-26 RCJMB04_13p14, NARS; asparaginyl-tRNA synthetase [EC:6.1.1.22]; K01893 asparaginyl-tRNA synthetase	GO:0043231//intracellular membranebounded organelle	GO:0004812//aminoacyltRNA ligase activity;GO:0032559//adenyl ribonucleotide binding	GO:0006418//tRNA aminoacylation for protein translation	gi|156547524|ref|XP_001606841.1|/3.93112e26/PREDICTED: similar to BcDNA.GH06451 [Nasonia vitripennis]
MergeConsencus29400	0.763543	0.705381	0.295114	1.54162	1.22711	1.47863	0.00463878	2.40775	Swissprot: Q9VLC0 0.0 VPS54_DROME Vacuolar protein sorting-associated protein 54 OS=Drosophila melanogaster GN=scat PE=1 SV=1|Nr: ref|XP_001846254.1| 0.0 vacuolar protein sorting [Culex quinquefasciatus] gb|EDS43080.1| vacuolar protein sorting [Culex quinquefasciatus]				gi|110748805|ref|XP_001121762.1|/0/PREDICTED: similar to scattered CG3766PA [Apis mellifera]
MergeConsencus4509	30.9906	41.5521	1.26085	64.2909	58.5143	54.6623	0.0246388	2.40459	Swissprot: P21522 6e-68 ROA1_SCHAM Heterogeneous nuclear ribonucleoprotein A1, A2/B1 homolog OS=Schistocerca americana GN=HNRNP PE=2 SV=1|Nr: ref|XP_624411.2| 4e-68 PREDICTED: similar to Heterogeneous nuclear ribonucleoprotein at 87F CG12749-PB, isoform B [Apis mellifera]|IPR: IPR000504; RNA recognition motif, RNP-1|GO: GO:0003676; nucleic acid binding; Molecular Function|Cog: SPCC622.08c 4e-39 -…	GO:0043231//intracellular membranebounded organelle;GO:0005700//polytene chromosome;GO:0044446//intracellular organelle part;GO:0030529//ribonucleoprotein complex	GO:0003723//RNA binding;GO:0003677//DNA binding	GO:0000380//alternative nuclear mRNA splicing, via spliceosome	gi|156549026|ref|XP_001607355.1|/7.8851e62/PREDICTED: similar to mammalian A1, A2 /B1 hnRNP homologue [Nasonia vitripennis]
MergeConsencus23506	2.11623	1.88501	1.53672	3.80662	2.95787	6.51978	0.0382096	2.39877	Swissprot: Q4V8T0 2e-26 MIOX_DANRE Inositol oxygenase OS=Danio rerio GN=miox PE=2 SV=1|Nr: gb|EEB19265.1| 2e-27 Inositol oxygenase, putative [Pediculus humanus corporis]|Kegg: dre:571850 5e-26 zgc:114168; zgc:114168 [EC:1.13.99.1]; K00469 inositol oxygenase		GO:0046872//metal ion binding;GO:0016491//oxidoreductase activity	GO:0008152//metabolic process	gi|242023158|ref|XP_002432003.1|/7.101e28/Inositol oxygenase, putative [Pediculus humanus corporis]
MergeConsencus13715	12.6965	23.2361	0.938781	34.6403	27.8215	25.6919	0.0352941	2.39084	Swissprot: O61492 1e-106 FLOT2_DROME Flotillin-2 OS=Drosophila melanogaster GN=Flo-2 PE=2 SV=3|Nr: ref|XP_310341.6| 1e-109 AGAP003789-PA [Anopheles gambiae str. PEST] gb|EAA06055.5| AGAP003789-PA [Anopheles gambiae str. PEST]|IPR: IPR004851; Flotillin|GO: GO:0016021; integral to membrane; Cellular Component	GO:0005901//caveola		GO:0009987//cellular process	gi|158288474|ref|XP_310341.6|/3.70049e100/AGAP003789PA [Anopheles gambiae str. PEST]
MergeConsencus17094	1.74405	5.35439	0.823883	6.43616	6.86711	5.58213	0.0316596	2.38382	Nr: ref|XP_001502506.1| 3e-06 PREDICTED: similar to up-regulated in colon cancer 6 [Equus caballus]
MergeConsencus4014	244.557	196.935	54.5704	455.761	420.603	303.327	0.0179968	2.37811	Swissprot: Q9W770 1e-119 SPON1_CHICK Spondin-1 OS=Gallus gallus GN=SPON1 PE=2 SV=1|Nr: ref|XP_975464.2| 0.0 PREDICTED: similar to f-spondin [Tribolium castaneum]|IPR: IPR000884; Thrombospondin, type I				gi|189236526|ref|XP_975464.2|/0/PREDICTED: similar to fspondin [Tribolium castaneum]
MergeConsencus18596	0.694721	1.14357	0.107405	1.57099	1.40679	1.64806	0.0221138	2.37747	Swissprot: Q9JIX8 2e-75 ACINU_MOUSE Apoptotic chromatin condensation inducer in the nucleus OS=Mus musculus GN=Acin1 PE=1 SV=2|Nr: ref|XP_320014.4| 5e-85 AGAP009237-PA [Anopheles gambiae str. PEST] gb|EAA15019.5| AGAP009237-PA [Anopheles gambiae str. PEST]|IPR: IPR000504; RNA recognition motif, RNP-1|GO: GO:0003676; nucleic acid binding; Molecular Function|Cog: SPAC140.02 2e-07 --|Kegg: xla:39799…				gi|156543227|ref|XP_001606509.1|/3.08548e70/PREDICTED: similar to ENSANGP00000010532 [Nasonia vitripennis]
MergeConsencus28327	1.19475	2.23484	0.419798	2.22584	3.84894	3.06737	0.0332138	2.37496	Nr: gb|ACD81876.1| 4e-08 RE59351p [Drosophila melanogaster]				gi|270002785|gb|EEZ99232.1|/7.51731e08/brinker [Tribolium castaneum]
MergeConsencus18291	2.76139	5.03811	0.662458	7.94007	6.21305	5.9161	0.0259643	2.3717	Swissprot: Q0R4F1 1e-165 PIF1_XENLA ATP-dependent DNA helicase PIF1 OS=Xenopus laevis GN=pif1 PE=2 SV=1|Nr: ref|XP_970873.1| 0.0 PREDICTED: similar to GA16856-PA [Tribolium castaneum]|IPR: IPR003593; AAA+ ATPase, core|GO: GO:0000166; nucleotide binding; Molecular Function		GO:0005488//binding;GO:0016787//hydrolase activity		gi|91089067|ref|XP_970873.1|/0/PREDICTED: similar to GA16856PA [Tribolium castaneum]
MergeConsencus18079	8.25854	7.5787	2.80271	20.2125	14.0494	9.78432	0.0358469	2.363	Swissprot: P15927 3e-24 RFA2_HUMAN Replication protein A 32 kDa subunit OS=Homo sapiens GN=RPA2 PE=1 SV=1|Nr: ref|XP_317127.3| 3e-27 AGAP008332-PA [Anopheles gambiae str. PEST] gb|EAA12428.4| AGAP008332-PA [Anopheles gambiae str. PEST]|IPR: IPR004365; Nucleic acid binding, OB-fold, tRNA/helicase-type	GO:0044428//nuclear part	GO:0003677//DNA binding;GO:0005515//protein binding	GO:0006289//nucleotideexcision repair	gi|158296779|ref|XP_317127.3|/2.25745e25/AGAP008332PA [Anopheles gambiae str. PEST]
MergeConsencus26752	1.0004	0.980204	0.322216	1.76736	1.78194	1.88349	0.00493433	2.35919	Swissprot: Q9QZR8 5e-29 PDZD2_RAT PDZ domain-containing protein 2 OS=Rattus norvegicus GN=Pdzd2 PE=1 SV=1|Nr: gb|EEB15042.1| 3e-97 pdz domain protein arc, putative [Pediculus humanus corporis]|IPR: IPR001478; PDZ/DHR/GLGF|GO: GO:0005515; protein binding; Molecular Function|Kegg: hsa:8777 4e-18 MPDZ; multiple PDZ domain protein; K06095 multiple PDZ domain protein	GO:0070161	GO:0005488//binding	GO:0001654//eye development	gi|193583632|ref|XP_001946238.1|/3.64109e53/PREDICTED: similar to arc CG6741PB [Acyrthosiphon pisum]
Contig2618	24.549	21.9368	1.89767	43.0227	33.1407	37.1605	0.0242057	2.3422	Nt: gb|AF542505.1| 9e-06 Ustilago maydis MAPKK kinase Kpp4 (kpp4) gene, complete cds
MergeConsencus20578	1.38266	1.43667	0.894819	2.77217	3.47268	2.43369	0.00461055	2.33662	Swissprot: P70705 0.0 ATP7A_RAT Copper-transporting ATPase 1 OS=Rattus norvegicus GN=Atp7a PE=1 SV=1|Nr: ref|XP_395837.2| 0.0 PREDICTED: similar to ATP7 CG1886-PA [Apis mellifera]|IPR: IPR001757; ATPase, P-type, K/Mg/Cd/Cu/Zn/Na/Ca/Na/H-transporter		GO:0005488//binding;GO:0016820//hydrolase activity, acting on acid anhydrides, catalyzing transmembrane movement of substances;GO:0015075//ion transmembrane transporter activity		gi|66553575|ref|XP_395837.2|/0/PREDICTED: similar to ATP7 CG1886PA [Apis mellifera]
MergeConsencus17739	4.52152	6.96618	0.241047	11.2382	9.12087	7.04513	0.0431615	2.3365	Swissprot: Q9C6S1 2e-07 FH14_ARATH Formin-like protein 14 OS=Arabidopsis thaliana GN=FH14 PE=2 SV=3|Nr: gb|EEB15769.1| 3e-20 hypothetical protein Phum_PHUM387840 [Pediculus humanus corporis]				gi|242015744|ref|XP_002428507.1|/8.07561e08/hypothetical protein Phum_PHUM387840 [Pediculus humanus corporis]
MergeConsencus609	24.6933	55.938	12.9744	76.967	73.0148	68.6114	0.0165583	2.33526	Swissprot: Q2KJG3 0.0 SYNC_BOVIN Asparaginyl-tRNA synthetase, cytoplasmic OS=Bos taurus GN=NARS PE=2 SV=3|Nr: ref|XP_001606841.1| 0.0 PREDICTED: similar to BcDNA.GH06451 [Nasonia vitripennis]|IPR: IPR002312; Aspartyl-tRNA synthetase, class IIb	GO:0044424//intracellular part	GO:0004812//aminoacyltRNA ligase activity;GO:0032559//adenyl ribonucleotide binding	GO:0006418//tRNA aminoacylation for protein translation	gi|156547524|ref|XP_001606841.1|/0/PREDICTED: similar to BcDNA.GH06451 [Nasonia vitripennis]
MergeConsencus16566	1.3504	1.98471	0.260968	3.81711	2.27877	2.28821	0.0450739	2.33145	Nr: ref|YP_990465.1| 8e-06 RemN protein [Burkholderia mallei SAVP1] gb|ABM48892.1| RemN protein [Burkholderia mallei SAVP1]
MergeConsencus2325	0.985228	1.19835	0.105047	2.25673	1.29946	1.76538	0.0401487	2.32522	Swissprot: Q7M3K2 8e-15 PELET_DROME Transposable element P transposase OS=Drosophila melanogaster GN=T PE=2 SV=2|Nr: gb|EEC16246.1| 8e-29 hypothetical protein IscW_ISCW013101 [Ixodes scapularis]				gi|270016307|gb|EFA12753.1|/1.75388e86/hypothetical protein TcasGA2_TC010280 [Tribolium castaneum]
MergeConsencus5918	5.8297	6.85444	2.49463	16.6257	11.7113	6.9383	0.0480487	2.32399	Swissprot: Q8NWQ4 1e-57 THD2_STAAW Threonine dehydratase catabolic OS=Staphylococcus aureus (strain MW2) GN=tdcB PE=3 SV=1|Nr: ref|XP_624902.1| 1e-172 PREDICTED: similar to CG8129-PB, isoform B [Apis mellifera]|IPR: IPR001926; Pyridoxal phosphate-dependent enzyme, beta subunit		GO:0005488//binding;GO:0003824//catalytic activity		gi|66508985|ref|XP_624902.1|/1.17393e152/PREDICTED: similar to CG8129PB, isoform B [Apis mellifera]
MergeConsencus5622	14.8481	28.8261	2.66925	42.7025	36.7098	28.1827	0.0388357	2.32169	Swissprot: Q24492 1e-161 RFA1_DROME Replication protein A 70 kDa DNA-binding subunit OS=Drosophila melanogaster GN=RpA-70 PE=1 SV=1|Nr: ref|XP_001662954.1| 1e-169 replication factor a 1, rfa1 [Aedes aegypti] gb|EAT34982.1| replication factor a 1, rfa1 [Aedes aegypti]|IPR: IPR004365; Nucleic acid binding, OB-fold, tRNA/helicase-type	GO:0043234//protein complex;GO:0043231//intracellular membranebounded organelle;GO:0015630//microtubule cytoskeleton	GO:0003677//DNA binding	GO:0000278//mitotic cell cycle;GO:0006260//DNA replication	gi|157133641|ref|XP_001662954.1|/1.79192e166/replication factor a 1, rfa1 [Aedes aegypti]
MergeConsencus19269	9.64951	12.2911	3.88499	24.1504	18.0926	17.7134	0.0123403	2.32158	Nr: gb|EEB11660.1| 2e-35 conserved hypothetical protein [Pediculus humanus corporis]|IPR: IPR008597; Destabilase				gi|242007136|ref|XP_002424398.1|/9.19571e36/conserved hypothetical protein [Pediculus humanus corporis]
MergeConsencus5078	0.878695	1.49233	0.301885	1.72484	2.25163	2.20581	0.0189021	2.31294	Swissprot: Q3ZCI8 3e-47 REEP4_BOVIN Receptor expression-enhancing protein 4 OS=Bos taurus GN=REEP4 PE=2 SV=1|Nr: ref|XP_001604196.1| 6e-58 PREDICTED: similar to conserved hypothetical protein [Nasonia vitripennis]|Cog: SPBC30D10.09c 4e-09 --				gi|156555552|ref|XP_001604196.1|/2.33789e58/PREDICTED: similar to conserved hypothetical protein [Nasonia vitripennis]
MergeConsencus15626	2.06572	3.94684	1.39722	5.47412	6.68122	4.95875	0.0121925	2.30966	Swissprot: P48588 2e-39 RS25_DROME 40S ribosomal protein S25 OS=Drosophila melanogaster GN=RpS25 PE=2 SV=3|Nr: gb|EEB14913.1| 2e-44 40S ribosomal protein S25, putative [Pediculus humanus corporis]|Cog: YLR333c 1e-13 --|Kegg: dme:Dmel_CG6684 4e-39 RpS25; Ribosomal protein S25; K02975 small subunit ribosomal protein S25e	GO:0015935//small ribosomal subunit	GO:0005198//structural molecule activity	GO:0010467//gene expression	gi|242013929|ref|XP_002427651.1|/6.11645e19/40S ribosomal protein S25, putative [Pediculus humanus corporis]
MergeConsencus18658	2.18959	3.5399	2.38019	4.73862	8.3135	5.64259	0.0188336	2.30523	Swissprot: P49630 4e-37 RL36_DROME 60S ribosomal protein L36 OS=Drosophila melanogaster GN=RpL36 PE=2 SV=1|Nr: emb|CAJ17425.1| 2e-41 ribosomal protein L36e [Cicindela littoralis]|IPR: IPR002557; Chitin binding protein, peritrophin-A|GO: GO:0005576; extracellular region; Cellular Component	GO:0030529//ribonucleoprotein complex	GO:0005198//structural molecule activity	GO:0010467//gene expression	gi|237761916|emb|CAR94544.1|/1.73529e44/ribosomal protein L36e [Blattella germanica]
MergeConsencus13855	4.89711	8.34573	0.808144	11.8983	12.0707	8.32908	0.0357493	2.29863	Swissprot: Q92503 0.0 S14L1_HUMAN SEC14-like protein 1 OS=Homo sapiens GN=SEC14L1 PE=2 SV=1|Nr: ref|XP_001600326.1| 0.0 PREDICTED: similar to CRAL/TRIO domain-containing protein [Nasonia vitripennis]|IPR: IPR001251; Cellular retinaldehyde-binding/triple function, C-terminal	GO:0043231//intracellular membranebounded organelle			gi|193699929|ref|XP_001951096.1|/0/PREDICTED: similar to SEC14 (S. cerevisiae)like 1 [Acyrthosiphon pisum]
Contig4917	9.27122	5.61561	0.434349	8.73551	12.0103	14.2816	0.0479068	2.28621	Swissprot: Q9R1P4 3e-89 PSA1_MOUSE Proteasome subunit alpha type-1 OS=Mus musculus GN=Psma1 PE=1 SV=1|Nr: gb|EEB09941.1| 1e-106 proteasome subunit alpha type, putative [Pediculus humanus corporis]|Nt: ref|XM_625029.2| 2e-26 PREDICTED: Apis mellifera similar to Proteasome subunit alpha type 1 (Proteasome component C2) (Macropain subunit C2) (Multicatalytic endopeptidase complex subunit C2) (Protea…
Contig3059	21.2206	11.5842	0.585847	26.7782	29.841	19.6911	0.0493785	2.28538	Swissprot: Q0S219 2e-14 IF2_RHOSR Translation initiation factor IF-2 OS=Rhodococcus sp. (strain RHA1) GN=infB PE=3 SV=1|Nr: ref|XP_393342.2| 8e-22 PREDICTED: similar to Msr-110 CG10596-PB, isoform B [Apis mellifera]|Nt: gb|AC140254.4| 2e-16 Mus musculus BAC clone RP23-467N7 from chromosome 10, complete sequence|Cog: RSc1191 7e-10 --|Kegg: rha:RHA1_ro06644 4e-14 infB; translation initiation factor…
MergeConsencus18143	16.8193	48.0189	9.7786	67.2288	64.5995	38.5349	0.0494151	2.28318	Swissprot: P41571 0.0 G6PD_CERCA Glucose-6-phosphate 1-dehydrogenase OS=Ceratitis capitata GN=ZW PE=2 SV=1|Nr: ref|XP_001848152.1| 0.0 glucose-6-phosphate 1-dehydrogenase [Culex quinquefasciatus] gb|EDS27746.1| glucose-6-phosphate 1-dehydrogenase [Culex quinquefasciatus]|IPR: IPR001282; Glucose-6-phosphate dehydrogenase		GO:0016616//oxidoreductase activity, acting on the CHOH group of donors, NAD or NADP as acceptor;GO:0000166//nucleotide binding	GO:0006007//glucose catabolic process	gi|170040752|ref|XP_001848152.1|/0/glucose6phosphate 1dehydrogenase [Culex quinquefasciatus]
MergeConsencus7899	76.7165	114.681	61.4849	196.003	187.854	191.742	0.00127178	2.27615	Swissprot: P49756 3e-53 RBM25_HUMAN Probable RNA-binding protein 25 OS=Homo sapiens GN=RBM25 PE=1 SV=2|Nr: ref|XP_635459.2| 1e-56 THO2 protein [Dictyostelium discoideum AX4] gb|EAL61962.2| putative THO2 protein [Dictyostelium discoideum AX4]|Cog: PA2976 3e-16 --|Kegg: pfa:PFL0625c 3e-51 eukaryotic translation initiation factor 3 subunit 10, putative; K03254 translation initiation factor eIF-3 sub…
MergeConsencus8520	1.79594	2.3036	1.38829	4.38426	3.85715	4.242	0.000816169	2.27474	Swissprot: Q62834 5e-38 CD123_RAT Cell division cycle protein 123 homolog OS=Rattus norvegicus GN=Cdc123 PE=1 SV=1|Nr: ref|XP_001599958.1| 3e-45 PREDICTED: similar to conserved hypothetical protein [Nasonia vitripennis]|IPR: IPR009772; D123	GO:0044424//intracellular part		GO:0022402//cell cycle process	gi|156550406|ref|XP_001599958.1|/1.0378e37/PREDICTED: similar to conserved hypothetical protein [Nasonia vitripennis]
MergeConsencus14121	1.95854	1.97384	0	3.55893	2.20333	3.16066	0.0482725	2.26909	Swissprot: Q80WC3 1e-06 TNC18_MOUSE Trinucleotide repeat-containing gene 18 protein OS=Mus musculus GN=Tnrc18 PE=1 SV=2|Nr: ref|XP_974369.1| 1e-09 PREDICTED: similar to Kruppel-like factor 13 like [Tribolium castaneum]
MergeConsencus16322	82.6613	83.3069	6.3391	150.67	117.102	123.145	0.0286642	2.26872	Swissprot: P24639 6e-20 ANXA7_DICDI Annexin A7 OS=Dictyostelium discoideum GN=nxnA PE=1 SV=1|Nr: ref|XP_001607749.1| 4e-66 PREDICTED: similar to CG17271-PA [Nasonia vitripennis]|IPR: IPR002048; Calcium-binding EF-hand		GO:0046872//metal ion binding		gi|156538673|ref|XP_001607749.1|/4.64414e50/PREDICTED: similar to CG17271PA [Nasonia vitripennis]
MergeConsencus3673	2.41862	3.53018	0.838104	4.47914	5.34799	5.55857	0.0138946	2.26697	Swissprot: P17248 1e-170 SYWC_BOVIN Tryptophanyl-tRNA synthetase, cytoplasmic OS=Bos taurus GN=WARS PE=1 SV=3|Nr: gb|EEB18409.1| 0.0 Tryptophanyl-tRNA synthetase, putative [Pediculus humanus corporis]|IPR: IPR001412; Aminoacyl-tRNA synthetase, class I, conserved site	GO:0000267//cell fraction;GO:0044424//intracellular part	GO:0004812//aminoacyltRNA ligase activity;GO:0032559//adenyl ribonucleotide binding	GO:0048646//anatomical structure formation involved in morphogenesis;GO:0022603//regulation of anatomical structure morphogenesis;GO:0006418//tRNA aminoacylation for protein translation;GO:0008283//cell proliferation	gi|242021429|ref|XP_002431147.1|/1.05882e169/TryptophanyltRNA synthetase, putative [Pediculus humanus corporis]
MergeConsencus11875	2.83241	2.22019	0	4.00311	4.24855	3.19962	0.0402932	2.26642	Swissprot: Q61471 3e-43 TOB1_MOUSE Protein Tob1 OS=Mus musculus GN=Tob1 PE=2 SV=1|Nr: gb|EEB10033.1| 3e-53 Tob1 protein, putative [Pediculus humanus corporis]|Kegg: bpm:BURPS1710b_A0946 4e-06 phosphotransferase enzyme family protein; K06979				gi|242003551|ref|XP_002422771.1|/8.27766e44/Tob1 protein, putative [Pediculus humanus corporis]
MergeConsencus18944	39.4364	56.9946	0.38106	78.2634	62.4813	78.518	0.0403225	2.26483	Swissprot: Q9P2K5 1e-57 MYEF2_HUMAN Myelin expression factor 2 OS=Homo sapiens GN=MYEF2 PE=1 SV=2|Nr: ref|XP_001603370.1| 1e-106 PREDICTED: similar to myelinprotein expression factor [Nasonia vitripennis]|IPR: IPR000504; RNA recognition motif, RNP-1|GO: GO:0003676; nucleic acid binding; Molecular Function|Cog: YCL011c 2e-10 --|Kegg: pfa:PFL0625c 4e-06 eukaryotic translation initiation factor 3 su…	GO:0043231//intracellular membranebounded organelle	GO:0003729//mRNA binding	GO:0006403//RNA localization;GO:0000578//embryonic axis specification	gi|156540189|ref|XP_001603370.1|/4.45683e85/PREDICTED: similar to myelinprotein expression factor [Nasonia vitripennis]
Contig4522	23.1993	33.7279	2.78693	34.1174	53.7848	47.2789	0.0398597	2.2638	Swissprot: P29981 1e-100 CP4C1_BLADI Cytochrome P450 4C1 OS=Blaberus discoidalis GN=CYP4C1 PE=2 SV=1|Nr: emb|CAQ57675.1| 1e-100 cytochrome P450 [Nilaparvata lugens]|Nt: ref|XM_001984654.1| 5e-07 Drosophila grimshawi GH16611 (Dgri\GH16611), mRNA|Cog: BH0579 2e-17 --|Kegg: dme:Dmel_CG1438 3e-83 Cyp4c3; Cytochrome P450-4c3 [EC:1.14.-.-]; K00517
MergeConsencus52659	9.3113	14.1265	4.87589	19.7398	25.8498	18.3225	0.0141458	2.25729	Swissprot: Q4UMH6 9e-47 Y381_RICFE Putative ankyrin repeat protein RF_0381 OS=Rickettsia felis GN=RF_0381 PE=4 SV=1|Nr: ref|XP_001309767.1| 9e-59 ankyrin repeat protein [Trichomonas vaginalis G3] gb|EAX96837.1| ankyrin repeat protein, putative [Trichomonas vaginalis G3]|IPR: IPR002110; Ankyrin|Cog: all2748 2e-32 --|Kegg: gga:396309 6e-46 ANK3; ankyrin 3; K10380 ankyrin				gi|123437955|ref|XP_001309767.1|/3.07353e58/ankyrin repeat protein [Trichomonas vaginalis G3]
MergeConsencus14845	53.4407	72.6427	9.06811	105.649	86.8808	112.198	0.0247847	2.25471	Swissprot: Q9JKR6 0.0 HYOU1_MOUSE Hypoxia up-regulated protein 1 OS=Mus musculus GN=Hyou1 PE=1 SV=1|Nr: ref|XP_001606217.1| 0.0 PREDICTED: similar to ENSANGP00000020237 [Nasonia vitripennis]|IPR: IPR001023; Heat shock protein Hsp70	GO:0044444//cytoplasmic part	GO:0000166//nucleotide binding		gi|242024934|ref|XP_002432881.1|/0/150 kDa oxygenregulated protein precursor, putative [Pediculus humanus corporis]
MergeConsencus5795	2.33426	2.74457	0	4.53622	3.28251	3.62572	0.0426617	2.25336	Swissprot: Q62192 2e-06 CD180_MOUSE CD180 antigen OS=Mus musculus GN=Cd180 PE=1 SV=1|Nr: gb|EEB19346.1| 9e-18 carboxypeptidase N subunit 2 precursor, putative [Pediculus humanus corporis]|IPR: IPR001611; Leucine-rich repeat				gi|242023324|ref|XP_002432084.1|/4.09647e18/carboxypeptidase N subunit 2 precursor, putative [Pediculus humanus corporis]
MergeConsencus17478	7.63543	16.01	3.83648	25.3597	22.3334	14.2318	0.0394633	2.25329	Swissprot: P23403 2e-47 RS20_XENLA 40S ribosomal protein S20 OS=Xenopus laevis GN=rps20 PE=3 SV=1|Nr: emb|CAH04341.1| 1e-51 S20e ribosomal protein [Dascillus cervinus]|IPR: IPR001848; Ribosomal protein S10|GO: GO:0003735; structural constituent of ribosome; Molecular Function	GO:0033279	GO:0005198//structural molecule activity	GO:0010467//gene expression	gi|50344510|emb|CAH04341.1|/4.09053e52/S20e ribosomal protein [Dascillus cervinus]
MergeConsencus10881	77.8528	97.3949	35.1952	191.245	158.223	124.198	0.0151289	2.25081	Swissprot: P29981 1e-151 CP4C1_BLADI Cytochrome P450 4C1 OS=Blaberus discoidalis GN=CYP4C1 PE=2 SV=1|Nr: emb|CAQ57675.1| 1e-153 cytochrome P450 [Nilaparvata lugens]|IPR: IPR001128; Cytochrome P450	GO:0044464//cell part	GO:0046872//metal ion binding;GO:0016491//oxidoreductase activity		gi|189178726|emb|CAQ57675.1|/7.88758e153/cytochrome P450 [Nilaparvata lugens]
Contig4858	469.644	771.356	191.028	1163.22	1002.76	1054.39	0.0133451	2.24882	Swissprot: P54399 1e-105 PDI_DROME Protein disulfide-isomerase OS=Drosophila melanogaster GN=Pdi PE=2 SV=1|Nr: gb|ACN89260.1| 1e-117 protein disulfide isomerase [Litopenaeus vannamei]|Nt: gb|EU247137.1| 6e-13 Lycosa singoriensis clone LSsin149 protein disulfide isomerase mRNA, partial cds|Cog: SPAC1F5.02 2e-36 --|Kegg: dpo:Dpse_GA20009 1e-106 GA20009-PA [EC:5.3.4.1]; K09580 prolyl 4-hydroxylase, …
MergeConsencus9817	1.02479	1.11223	0	1.33695	1.77365	1.69195	0.0401426	2.2473	Nr: ref|XP_001946779.1| 3e-16 PREDICTED: similar to pol-like protein, partial [Acyrthosiphon pisum]|IPR: IPR002156; Ribonuclease H				gi|193661993|ref|XP_001946779.1|/2.46276e14/PREDICTED: similar to pollike protein, partial [Acyrthosiphon pisum]
MergeConsencus22178	0.77283	0.778865	0.341375	1.87245	0.993625	1.3719	0.0279268	2.23867	Swissprot: Q5ZLN8 1e-138 DDX55_CHICK ATP-dependent RNA helicase DDX55 OS=Gallus gallus GN=DDX55 PE=2 SV=1|Nr: ref|XP_001949864.1| 1e-147 PREDICTED: similar to predicted protein [Acyrthosiphon pisum]|IPR: IPR001650; DNA/RNA helicase, C-terminal|GO: GO:0003676; nucleic acid binding; Molecular Function		GO:0005488//binding;GO:0016787//hydrolase activity		gi|66557666|ref|XP_624800.1|/6.23931e140/PREDICTED: similar to DEAD (AspGluAlaAsp) box polypeptide 55 [Apis mellifera]
MergeConsencus5583	1.08259	1.55574	0	1.70005	2.02982	2.17411	0.0432697	2.23778	Swissprot: Q9VZZ4 1e-143 PXDN_DROME Peroxidasin OS=Drosophila melanogaster GN=Pxn PE=1 SV=1|Nr: gb|EEB18896.1| 1e-162 Thyroid peroxidase precursor, putative [Pediculus humanus corporis]|IPR: IPR002007; Haem peroxidase, animal		GO:0005506//iron ion binding;GO:0016209//antioxidant activity	GO:0008152//metabolic process;GO:0006950//response to stress	gi|242022412|ref|XP_002431634.1|/6.82776e162/Thyroid peroxidase precursor, putative [Pediculus humanus corporis]
MergeConsencus5772	1.62575	1.21063	0.502688	2.3743	2.37762	2.69356	0.00824821	2.22981	Swissprot: P49696 0.0 SYVC_FUGRU Valyl-tRNA synthetase OS=Fugu rubripes GN=vars PE=3 SV=1|Nr: gb|EEB18877.1| 0.0 Valyl-tRNA synthetase, putative [Pediculus humanus corporis]|IPR: IPR001412; Aminoacyl-tRNA synthetase, class I, conserved site	GO:0044424//intracellular part	GO:0004812//aminoacyltRNA ligase activity;GO:0032559//adenyl ribonucleotide binding	GO:0006418//tRNA aminoacylation for protein translation	gi|242022374|ref|XP_002431615.1|/0/ValyltRNA synthetase, putative [Pediculus humanus corporis]
MergeConsencus6607	56.2328	75.2369	1.33237	102.617	89.1957	103.925	0.0372715	2.22691	Swissprot: Q5R9C7 9e-77 SC11A_PONAB Signal peptidase complex catalytic subunit SEC11A OS=Pongo abelii GN=SEC11A PE=2 SV=1|Nr: ref|NP_001040280.1| 2e-87 signal peptidase 18 kDa subunit [Bombyx mori] gb|ABD36356.1| signal peptidase 18 kDa subunit [Bombyx mori]|IPR: IPR000223; Peptidase S26A, signal peptidase I	GO:0031224//intrinsic to membrane	GO:0070011//peptidase activity, acting on Lamino acid peptides	GO:0051605//protein maturation by peptide bond cleavage	gi|114052797|ref|NP_001040280.1|/6.432e88/signal peptidase 18 kDa subunit [Bombyx mori]
MergeConsencus18747	60.0171	75.4943	21.9439	128.632	124.184	97.8115	0.0128696	2.22684	Swissprot: P83917 4e-58 CBX1_MOUSE Chromobox protein homolog 1 OS=Mus musculus GN=Cbx1 PE=1 SV=1|Nr: gb|EEB13805.1| 2e-72 hypothetical protein Phum_PHUM259320 [Pediculus humanus corporis]|IPR: IPR000953; Chromo domain	GO:0015630//microtubule cytoskeleton;GO:0000790//nuclear chromatin;GO:0031981//nuclear lumen;GO:0045120//pronucleus;GO:0000775//chromosome, centromeric region	GO:0030528//transcription regulator activity;GO:0005515//protein binding	GO:0006355//regulation of transcription, DNAdependent	gi|242011615|ref|XP_002426543.1|/1.97642e57/hypothetical protein Phum_PHUM259320 [Pediculus humanus corporis]
MergeConsencus17693	3.67209	5.48448	0.613745	8.97707	5.69415	7.0631	0.040073	2.22453	Swissprot: P14576 0.0 SRP54_MOUSE Signal recognition particle 54 kDa protein OS=Mus musculus GN=Srp54 PE=1 SV=2|Nr: gb|EEB12639.1| 0.0 Signal recognition particle 54 kDa protein, putative [Pediculus humanus corporis]|IPR: IPR000897; Signal recognition particle, SRP54 subunit, GTPase	GO:0030529//ribonucleoprotein complex	GO:0042277//peptide binding;GO:0003723//RNA binding;GO:0032561//guanyl ribonucleotide binding;GO:0016462//pyrophosphatase activity	GO:0007033//vacuole organization;GO:0006614//SRPdependent cotranslational protein targeting to membrane;GO:0006914//autophagy	gi|242009196|ref|XP_002425377.1|/0/Signal recognition particle 54 kDa protein, putative [Pediculus humanus corporis]
MergeConsencus3884	1.78816	1.05124	0.460756	3.36967	1.8999	2.01999	0.0469604	2.20885	Swissprot: Q5REH1 1e-147 PICK1_PONAB PRKCA-binding protein OS=Pongo abelii GN=PICK1 PE=2 SV=1|Nr: gb|EEB12464.1| 1e-180 PRKCA-binding protein, putative [Pediculus humanus corporis]|IPR: IPR001478; PDZ/DHR/GLGF		GO:0016772//transferase activity, transferring phosphoruscontaining groups;GO:0005488//binding		gi|242008834|ref|XP_002425202.1|/1.67702e165/PRKCAbinding protein, putative [Pediculus humanus corporis]
MergeConsencus34502	2.96441	4.87968	2.06237	9.00781	5.83611	7.03235	0.0162969	2.20828	Swissprot: P55935 1e-21 RS9_DROME 40S ribosomal protein S9 OS=Drosophila melanogaster GN=RpS9 PE=1 SV=2|Nr: ref|XP_001846568.1| 3e-22 conserved hypothetical protein [Culex quinquefasciatus] gb|EDS44059.1| conserved hypothetical protein [Culex quinquefasciatus]|Cog: SPBC29A3.12 2e-16 --|Kegg: dpo:Dpse_GA17422 7e-21 GA17422-PA; K02997 small subunit ribosomal protein S9e	GO:0015935//small ribosomal subunit	GO:0003723//RNA binding;GO:0005198//structural molecule activity	GO:0007052//mitotic spindle organization;GO:0010467//gene expression	gi|170037445|ref|XP_001846568.1|/1.24854e22/conserved hypothetical protein [Culex quinquefasciatus]
MergeConsencus5426	3.46385	3.30031	0.553986	4.64233	4.97176	6.54404	0.0284514	2.20795	Swissprot: P22411 1e-134 DPP4_PIG Dipeptidyl peptidase 4 OS=Sus scrofa GN=DPP4 PE=1 SV=3|Nr: ref|XP_001603694.1| 0.0 PREDICTED: similar to dipeptidyl-peptidase [Nasonia vitripennis]|IPR: IPR001375; Peptidase S9, prolyl oligopeptidase active site region		GO:0008238//exopeptidase activity		gi|156548358|ref|XP_001603694.1|/0/PREDICTED: similar to dipeptidylpeptidase [Nasonia vitripennis]
MergeConsencus13681	16.8014	19.6357	2.73836	30.8981	26.5301	28.9267	0.0214953	2.20432	Swissprot: Q9H477 5e-66 RBSK_HUMAN Ribokinase OS=Homo sapiens GN=RBKS PE=1 SV=1|Nr: gb|EEB17965.1| 4e-73 Ribokinase, putative [Pediculus humanus corporis]|IPR: IPR002139; Ribokinase				gi|242020525|ref|XP_002430703.1|/5.24551e63/Ribokinase, putative [Pediculus humanus corporis]
MergeConsencus8020	64.7488	120.245	8.55792	165.987	129.619	130.809	0.0434414	2.2031	Swissprot: Q8BX90 0.0 FND3A_MOUSE Fibronectin type-III domain-containing protein 3a OS=Mus musculus GN=Fndc3a PE=1 SV=2|Nr: gb|EEB11871.1| 0.0 Fibronectin type-III domain-containing protein 3A, putative [Pediculus humanus corporis]|IPR: IPR003961; Fibronectin, type III
MergeConsencus7600	51.0453	88.5754	23.7783	127.407	110.947	119.774	0.0142847	2.19173	Swissprot: Q5RCE2 0.0 STT3A_PONAB Dolichyl-diphosphooligosaccharide--protein glycosyltransferase subunit STT3A OS=Pongo abelii GN=STT3A PE=2 SV=1|Nr: ref|XP_392786.2| 0.0 PREDICTED: similar to CG1518-PA isoform 1 [Apis mellifera]|IPR: IPR003674; Oligosaccharyl transferase, STT3 subunit|GO: GO:0004576; oligosaccharyl transferase activity; Molecular Function	GO:0044464//cell part	GO:0016758//transferase activity, transferring hexosyl groups	GO:0006464//protein modification process	gi|270006562|gb|EFA03010.1|/0/hypothetical protein TcasGA2_TC010433 [Tribolium castaneum]
MergeConsencus3000	5.26606	3.75925	0	7.44266	6.3474	5.94879	0.0466788	2.18705	Swissprot: P78333 2e-13 GPC5_HUMAN Glypican-5 OS=Homo sapiens GN=GPC5 PE=2 SV=1|Nr: ref|XP_624924.2| 1e-21 PREDICTED: similar to division abnormally delayed CG4974-PA [Apis mellifera]|IPR: IPR001863; Glypican|GO: GO:0005578; proteinaceous extracellular matrix; Cellular Component|Cog: RSc1191 3e-09 --|Kegg: cfa:485518 5e-14 GPC5, LOC485518; glypican 5; K08111 glypican 5				gi|110757081|ref|XP_624924.2|/4.14491e20/PREDICTED: similar to division abnormally delayed CG4974PA [Apis mellifera]
MergeConsencus8678	2.84418	7.9423	1.64894	9.54692	9.79897	7.8315	0.0361793	2.18548	Nr: ref|XP_973704.1| 3e-19 PREDICTED: similar to conserved hypothetical protein [Tribolium castaneum]				gi|91086815|ref|XP_973704.1|/1.89156e18/PREDICTED: similar to conserved hypothetical protein [Tribolium castaneum]
MergeConsencus15531	7.02863	12.1098	3.55042	22.228	13.857	13.4428	0.0388199	2.18291	Swissprot: O35261 2e-59 E2F3_MOUSE Transcription factor E2F3 OS=Mus musculus GN=E2f3 PE=1 SV=2|Nr: ref|XP_001607080.1| 3e-83 PREDICTED: similar to transcriptional activator [Nasonia vitripennis]|IPR: IPR003316; Transcription factor E2F/dimerisation partner (TDP)|GO: GO:0003700; transcription factor activity; Molecular Function		GO:0005488//binding	GO:0006355//regulation of transcription, DNAdependent	gi|156546407|ref|XP_001607080.1|/1.52767e69/PREDICTED: similar to transcriptional activator [Nasonia vitripennis]
MergeConsencus9051	23.595	34.9982	4.30258	53.3558	40.8369	42.9198	0.0321648	2.18	Swissprot: Q4R8M9 4e-15 GTSF1_MACFA Gametocyte-specific factor 1 OS=Macaca fascicularis GN=GTSF1 PE=2 SV=1|Nr: ref|XP_001985260.1| 4e-17 GH16964 [Drosophila grimshawi] gb|EDV97608.1| GH16964 [Drosophila grimshawi]|IPR: IPR007917; Protein of unknown function UPF0224				gi|189234470|ref|XP_001808575.1|/3.87006e16/PREDICTED: similar to AGAP012911PA [Tribolium castaneum]
MergeConsencus17336	70.3721	144.94	31.1114	191.254	167.011	177.912	0.0236358	2.17583	Swissprot: A7MC64 1e-55 RTN1_XENTR Reticulon-1 OS=Xenopus tropicalis GN=rtn1 PE=2 SV=2|Nr: ref|XP_395158.3| 2e-76 PREDICTED: similar to Rtnl1 CG33113-PB, isoform B [Apis mellifera]|IPR: IPR003388; Reticulon|GO: GO:0005783; endoplasmic reticulum; Cellular Component	GO:0005783//endoplasmic reticulum		GO:0002118//aggressive behavior	gi|110777303|ref|XP_395158.3|/4.8281e75/PREDICTED: similar to Rtnl1 CG33113PB, isoform B [Apis mellifera]
MergeConsencus19032	157.998	188.285	1.23994	252.018	214.437	287.504	0.0465144	2.16952	Swissprot: P29844 5e-99 HSP7C_DROME Heat shock 70 kDa protein cognate 3 OS=Drosophila melanogaster GN=Hsc70-3 PE=2 SV=2|Nr: gb|EEB17838.1| 1e-102 Heat shock 70 kDa protein cognate 3 precursor, putative [Pediculus humanus corporis]|IPR: IPR001023; Heat shock protein Hsp70	GO:0043231//intracellular membranebounded organelle;GO:0044444//cytoplasmic part;GO:0015630//microtubule cytoskeleton	GO:0017111//nucleosidetriphosphatase activity;GO:0032559//adenyl ribonucleotide binding	GO:0035194//posttranscriptional gene silencing by RNA;GO:0006950//response to stress;GO:0007610//behavior	gi|242020266|ref|XP_002430576.1|/1.08719e102/Heat shock 70 kDa protein cognate 3 precursor, putative [Pediculus humanus corporis]
MergeConsencus10360	17.9611	9.71813	0.982947	22.6891	19.3119	20.1101	0.0449569	2.16701	IPR: IPR006162; Phosphopantetheine attachment site|GO: GO:0031177; phosphopantetheine binding; Molecular Function
MergeConsencus4703	1.87752	1.7345	0.518338	3.60125	3.47002	1.81795	0.0458131	2.15216	Swissprot: Q28EH9 3e-52 T194A_XENTR Transmembrane protein 194A OS=Xenopus tropicalis GN=tmem194a PE=2 SV=1|Nr: ref|XP_968186.1| 2e-95 PREDICTED: similar to CG9723 CG9723-PA [Tribolium castaneum]|IPR: IPR016196; MFS general substrate transporter				gi|91076588|ref|XP_968186.1|/7.12518e92/PREDICTED: similar to CG9723 CG9723PA [Tribolium castaneum]
MergeConsencus7743	7.89294	7.34456	2.54534	15.6722	8.60706	10.3932	0.0335011	2.14977	Swissprot: Q26454 0.0 MCM4_DROME DNA replication licensing factor MCM4 OS=Drosophila melanogaster GN=dpa PE=1 SV=2|Nr: ref|XP_002032754.1| 0.0 GM20786 [Drosophila sechellia] gb|EDW46767.1| GM20786 [Drosophila sechellia]|IPR: IPR001208; MCM
MergeConsencus17287	226.004	290.738	31.1254	398.354	341.741	436.879	0.0322074	2.14828	Swissprot: P29844 1e-175 HSP7C_DROME Heat shock 70 kDa protein cognate 3 OS=Drosophila melanogaster GN=Hsc70-3 PE=2 SV=2|Nr: ref|XP_001845218.1| 0.0 78 kDa glucose-regulated protein [Culex quinquefasciatus] gb|EDS39731.1| 78 kDa glucose-regulated protein [Culex quinquefasciatus]|IPR: IPR000886; Endoplasmic reticulum, targeting sequence		GO:0032559//adenyl ribonucleotide binding	GO:0050896//response to stimulus	gi|156545557|ref|XP_001606463.1|/2.20462e156/PREDICTED: similar to ENSANGP00000012893 [Nasonia vitripennis]
MergeConsencus20347	2.50304	3.88478	0.348278	5.87243	4.33646	4.07167	0.0492408	2.12	Swissprot: Q96AA3 1e-100 RFT1_HUMAN Protein RFT1 homolog OS=Homo sapiens GN=RFT1 PE=1 SV=1|Nr: ref|XP_001605141.1| 1e-107 PREDICTED: similar to ENSANGP00000025925 [Nasonia vitripennis]|IPR: IPR007594; RFT1|GO: GO:0005319; lipid transporter activity; Molecular Function			GO:0006487//protein amino acid Nlinked glycosylation	gi|156555582|ref|XP_001605141.1|/1.6271e98/PREDICTED: similar to ENSANGP00000025925 [Nasonia vitripennis]
MergeConsencus1181	4.60772	4.43263	1.03617	8.76189	4.80663	7.66569	0.0439999	2.1073	Swissprot: P55935 5e-68 RS9_DROME 40S ribosomal protein S9 OS=Drosophila melanogaster GN=RpS9 PE=1 SV=2|Nr: gb|ABG01896.1| 1e-69 S9 ribosomal protein [Gryllus firmus] gb|ABG01897.1| S9 ribosomal protein [Gryllus bimaculatus] gb|ABG01898.1| S9 ribosomal protein [Gryllus veletis] gb|ABG01899.1| S9 ribosomal protein [Gryllus pennsylvanicus]|IPR: IPR001912; Ribosomal protein S4	GO:0015935//small ribosomal subunit	GO:0003723//RNA binding;GO:0005198//structural molecule activity	GO:0007052//mitotic spindle organization;GO:0010467//gene expression	gi|108742520|gb|ABG01896.1|/3.15629e65/S9 ribosomal protein [Gryllus firmus]
MergeConsencus6903	41.6984	79.7596	24.4223	117.391	80.9369	108.972	0.0262365	2.10652	Swissprot: Q94527 5e-94 NFKB1_DROME Nuclear factor NF-kappa-B p110 subunit OS=Drosophila melanogaster GN=Rel PE=1 SV=1|Nr: gb|AAZ08479.1| 0.0 relish [Drepanotermes rubriceps]|IPR: IPR000451; NF-kappa-B/Rel/dorsal				gi|70795032|gb|AAZ08479.1|/0/relish [Drepanotermes rubriceps]
MergeConsencus21411	2.71438	2.18596	0.488633	4.41438	3.55561	3.31832	0.0292778	2.0947	Nr: ref|XP_001598998.1| 8e-15 PREDICTED: similar to ORF2-encoded protein [Nasonia vitripennis]				gi|156539768|ref|XP_001598998.1|/2.3441e13/PREDICTED: similar to ORF2encoded protein [Nasonia vitripennis]
MergeConsencus6239	15.304	26.669	2.76696	35.2576	24.9417	33.2559	0.0495893	2.08885	Swissprot: Q9P2J5 0.0 SYLC_HUMAN Leucyl-tRNA synthetase, cytoplasmic OS=Homo sapiens GN=LARS PE=1 SV=2|Nr: ref|XP_975388.1| 0.0 PREDICTED: similar to leucyl-tRNA synthetase [Tribolium castaneum]|IPR: IPR001412; Aminoacyl-tRNA synthetase, class I, conserved site	GO:0044444//cytoplasmic part	GO:0004812//aminoacyltRNA ligase activity;GO:0000166//nucleotide binding	GO:0006418//tRNA aminoacylation for protein translation	gi|270006203|gb|EFA02651.1|/0/hypothetical protein TcasGA2_TC008372 [Tribolium castaneum]
MergeConsencus32788	1.58948	2.80331	0.409561	3.74408	3.27825	2.99258	0.0373045	2.08542	Swissprot: Q9VWP4 6e-28 SUOX_DROME Probable sulfite oxidase, mitochondrial OS=Drosophila melanogaster GN=CG7280 PE=2 SV=1|Nr: ref|XP_971620.2| 7e-34 PREDICTED: similar to CG7280 CG7280-PA [Tribolium castaneum]|IPR: IPR005066; Moybdenum cofactor oxidoreductase, dimerisation	GO:0005740//mitochondrial envelope	GO:0046914//transition metal ion binding;GO:0016670//oxidoreductase activity, acting on sulfur group of donors, oxygen as acceptor	GO:0009057//macromolecule catabolic process;GO:0044237//cellular metabolic process	gi|189234936|ref|XP_971620.2|/2.86713e34/PREDICTED: similar to CG7280 CG7280PA [Tribolium castaneum]
MergeConsencus12674	1.13366	1.92535	0.146055	2.40335	1.98388	2.27669	0.0474979	2.07918	Swissprot: P80060 2e-14 LCM_LOCMI Protease inhibitors OS=Locusta migratoria PE=1 SV=2|Nr: sp|P80060|LCM_LOCMI 2e-13 RecName: Full=Protease inhibitors; Contains: RecName: Full=Protease inhibitor LCMI-I; AltName: Full=PARS intercerebralis major peptide D2; Short=PMP-D2; Contains: RecName: Full=Protease inhibitor LCMI-II; AltName: Full=PARS intercerebralis major peptide C; Short=PMP-C; Flags: Precur…		GO:0004866//endopeptidase inhibitor activity		gi|3123220|sp|P80060.2|LCM_LOCMI/1.01601e13/RecName: Full=Protease inhibitors; Contains: RecName: Full=Protease inhibitor LCMII; AltName: Full=PARS intercerebralis major peptide D2; Short=PMPD2; Contains: RecName: Full=Protease inhibitor LCMIII; AltName:
MergeConsencus4725	2.14096	2.34948	0.551663	3.83278	2.89026	3.22471	0.0303212	2.07294	Swissprot: Q8NCJ5 6e-78 SPRY3_HUMAN SPRY domain-containing protein 3 OS=Homo sapiens GN=SPRYD3 PE=1 SV=2|Nr: ref|XP_002221709.1| 1e-88 hypothetical protein BRAFLDRAFT_123644 [Branchiostoma floridae] gb|EEA58834.1| hypothetical protein BRAFLDRAFT_123644 [Branchiostoma floridae]|IPR: IPR003877; SPla/RYanodine receptor SPRY				gi|260796617|ref|XP_002593301.1|/2.0449e84/hypothetical protein BRAFLDRAFT_123644 [Branchiostoma floridae]
MergeConsencus16596	22.4217	15.2411	2.03112	28.7183	26.2094	27.3074	0.0389439	2.07173	Swissprot: Q8LAX0 1e-56 HMT3_ARATH Homocysteine S-methyltransferase 3 OS=Arabidopsis thaliana GN=HMT3 PE=1 SV=2|Nr: ref|XP_966501.1| 3e-89 PREDICTED: similar to homocysteine S-methyltransferase isoform 1 [Tribolium castaneum]|IPR: IPR003726; Homocysteine S-methyltransferase|GO: GO:0008898; homocysteine S-methyltransferase activity; Molecular Function|Cog: CAC3348 2e-56 --|Kegg: dpo:Dpse_GA10443 9…		GO:0016740//transferase activity		gi|110748878|ref|XP_001121618.1|/9.04856e85/PREDICTED: similar to CG10621PA [Apis mellifera]
MergeConsencus7193	17.7696	27.257	3.8682	37.2383	34.0068	28.6103	0.039461	2.04225	Swissprot: O43390 1e-162 HNRPR_HUMAN Heterogeneous nuclear ribonucleoprotein R OS=Homo sapiens GN=HNRNPR PE=1 SV=1|Nr: ref|XP_392307.3| 0.0 PREDICTED: similar to CG17838-PE, isoform E [Apis mellifera]|IPR: IPR000504; RNA recognition motif, RNP-1|GO: GO:0003676; nucleic acid binding; Molecular Function|Cog: ECU02g0250 8e-07 --|Kegg: dme:Dmel_CG31762 4e-11 aret; arrest; K02177 RNA binding protein (…	GO:0005681//spliceosomal complex	GO:0046872//metal ion binding;GO:0003723//RNA binding	GO:0000377//RNA splicing, via transesterification reactions with bulged adenosine as nucleophile	gi|110756254|ref|XP_392307.3|/0/PREDICTED: similar to CG17838PE, isoform E [Apis mellifera]
MergeConsencus9946	9.61402	14.6009	3.63846	20.5939	21.9129	14.2543	0.0357064	2.03785	Swissprot: O14657 2e-65 TOR1B_HUMAN Torsin-1B OS=Homo sapiens GN=TOR1B PE=2 SV=2|Nr: gb|EEB19781.1| 2e-87 conserved hypothetical protein [Pediculus humanus corporis]|IPR: IPR001781; Zinc finger, LIM-type|GO: GO:0008270; zinc ion binding; Molecular Function|Cog: TM0198 3e-07 --|Kegg: gga:418815 3e-24 LMO7; LIM domain 7; K06084 F-box protein 20	GO:0044424//intracellular part	GO:0005515//protein binding	GO:0006950//response to stress	gi|156544862|ref|XP_001607079.1|/4.56829e83/PREDICTED: similar to CG31534PA [Nasonia vitripennis]
MergeConsencus18683	9.96154	15.6452	2.86656	22.6084	16.5236	17.0849	0.0455626	2.01744	Swissprot: Q15269 0.0 PWP2_HUMAN Periodic tryptophan protein 2 homolog OS=Homo sapiens GN=PWP2 PE=1 SV=2|Nr: ref|XP_001600681.1| 0.0 PREDICTED: similar to GA11557-PA [Nasonia vitripennis]|IPR: IPR001680; WD40 repeat				gi|156550809|ref|XP_001600681.1|/0/PREDICTED: similar to GA11557PA [Nasonia vitripennis]
MergeConsencus6470	27.085	26.6253	3.77553	37.6524	42.9581	33.606	0.0406442	2.01686	Swissprot: Q5R941 1e-18 FKB14_PONAB FK506-binding protein 14 OS=Pongo abelii GN=FKBP14 PE=2 SV=1|Nr: ref|XP_970906.1| 1e-50 PREDICTED: similar to AGAP008822-PA [Tribolium castaneum]|IPR: IPR000886; Endoplasmic reticulum, targeting sequence		GO:0046872//metal ion binding;GO:0003676//nucleic acid binding;GO:0005527//macrolide binding	GO:0044267//cellular protein metabolic process;GO:0002118//aggressive behavior	gi|91079995|ref|XP_970906.1|/3.66195e51/PREDICTED: similar to AGAP008822PA [Tribolium castaneum]

## Sheet: Down
GeneID	P1_RPKM-adj	P2_RPKM-adj	P3_RPKM-adj	PM24-1_RPKM-adj	PM24-2_RPKM-adj	PM24-3_RPKM-adj	Pval	FC	Description
Contig3306	7.3083	11.7588	20.2189	0	0.865446	1.73806	0.0164296	20.0246	Swissprot: Q9W1C9 1e-29 PEB3_DROME Ejaculatory bulb-specific protein 3 OS=Drosophila melanogaster GN=PebIII PE=1 SV=2|Nr: emb|CAJ01466.1| 7e-66 hypothetical protein [Locusta migratoria]|Nt: emb|AJ251079.1|LMI251079 0.0 Locusta migratoria mRNA for chemosensory protein (OS-D5 gene)
MergeConsencus41329	2.7214	3.87339	5.64669	0.404865	0.161133	0.323602	0.00570253	19.209	Swissprot: Q5SPP0 1e-35 RLBL2_DANRE Retinaldehyde-binding protein 1-like protein 2 OS=Danio rerio GN=rlbp1l2 PE=2 SV=1|Nr: gb|EEC01192.1| 3e-38 hypothetical protein IscW_ISCW001700 [Ixodes scapularis]|IPR: IPR001071; Cellular retinaldehyde binding/alpha-tocopherol transport
MergeConsencus6443	620.018	677.484	307.227	23.1518	42.5917	29.3748	0.00599061	17.9486	Swissprot: P55859 5e-88 PNPH_BOVIN Purine nucleoside phosphorylase OS=Bos taurus GN=NP PE=1 SV=3|Nr: ref|XP_391850.2| 1e-105 PREDICTED: similar to CG16758-PD, isoform D [Apis mellifera]|IPR: IPR001369; Purine phosphorylase, family 2|GO: GO:0016763; transferase activity, transferring pentosyl groups; Molecular Function|Cog: lin2067 1e-63 --|Kegg: dpo:Dpse_GA14131 5e-92 GA14131-PA [EC:2.4.2.1]; K03…
Contig4721	5.57402	8.42632	1.0259	0.187569	0.597208	0.149921	0.0476413	14.1494	Swissprot: O76217 5e-10 PE1_ANOGA Peritrophin-1 OS=Anopheles gambiae GN=Aper1 PE=2 SV=2|Nr: ref|XP_001811526.1| 2e-34 PREDICTED: similar to AGAP012133-PA [Tribolium castaneum]|Kegg: dme:Dmel_CG18140 3e-12 Cht3; Chitinase 3 [EC:3.2.1.14]; K01183 chitinase
MergeConsencus42921	2.7502	1.50902	5.24397	0.518256	0.412524	0.62135	0.036789	12.8741	Swissprot: P80229 1e-18 ILEU_PIG Leukocyte elastase inhibitor OS=Sus scrofa GN=SERPINB1 PE=1 SV=1|Nr: dbj|BAB25964.1| 7e-18 unnamed protein product [Mus musculus]|Cog: MA2613 6e-07 --|Kegg: mmu:11905 1e-14 Serpinc1; serine (or cysteine) peptidase inhibitor, clade C (antithrombin), member 1; K03911 antithrombin III
MergeConsencus55837	7.09594	11.5001	10.9705	1.6263	1.07876	0.433292	0.00176382	12.5749	Swissprot: A1L1W9 4e-39 MOT10_DANRE Monocarboxylate transporter 10 OS=Danio rerio GN=slc16a10 PE=2 SV=1|Nr: ref|XP_397345.2| 6e-51 PREDICTED: similar to karmoisin CG12286-PA [Apis mellifera]|IPR: IPR011701; Major facilitator superfamily MFS-1
MergeConsencus3002	8.80853	5.50209	5.74517	0.778083	0.929013	0.932862	0.00275307	8.8773	Nr: gb|EEC06625.1| 1e-11 hypothetical protein IscW_ISCW003746 [Ixodes scapularis]
MergeConsencus45111	6.58864	8.77968	19.184	3.41436	1.23535	1.48857	0.0371577	8.74191	Swissprot: P82147 7e-37 L2EFL_DROME Protein lethal(2)essential for life OS=Drosophila melanogaster GN=l(2)efl PE=1 SV=1|Nr: gb|ABC84492.1| 8e-93 heat shock protein 20.5 [Locusta migratoria]|IPR: IPR001436; Alpha crystallin/Heat shock protein
MergeConsencus48822	1.289	3.03115	2.35515	0.496848	0.131828	0.397122	0.0110724	8.15883	Swissprot: Q9QZR8 2e-20 PDZD2_RAT PDZ domain-containing protein 2 OS=Rattus norvegicus GN=Pdzd2 PE=1 SV=1|Nr: gb|EEB10482.1| 4e-45 pdz domain protein arc, putative [Pediculus humanus corporis]|IPR: IPR001478; PDZ/DHR/GLGF|GO: GO:0005515; protein binding; Molecular Function|Kegg: rno:29365 6e-17 Mpdz; multiple PDZ domain protein; K06095 multiple PDZ domain protein
MergeConsencus18469	133.933	85.2992	49.8555	7.66178	11.9283	17.5613	0.0172463	7.83761	Nr: gb|ABR27858.1| 1e-41 hypothetical protein [Triatoma infestans]|IPR: IPR015967; Zinc finger C4-type, RecR|GO: GO:0006281; DNA repair; Biological Process
Contig3566	24.4135	41.2379	28.1749	4.37377	5.80242	4.27274	0.00333586	7.6633	Swissprot: O18598 7e-48 GST1_BLAGE Glutathione S-transferase OS=Blattella germanica PE=1 SV=3|Nr: ref|XP_001600977.1| 7e-47 PREDICTED: similar to Glutathione S-transferase (GST class-sigma) (Major allergen Bla g 5) [Nasonia vitripennis]|Kegg: dme:Dmel_CG8938 2e-35 GstS1; Glutathione S transferase S1 [EC:2.5.1.18]; K00799 glutathione S-transferase
Contig515	192.325	264.531	177.521	15.3859	41.4063	39.2355	0.00155109	7.32629	Nr: emb|CAK11515.1| 8e-06 novel galactose binding lectin domain containing protein [Danio rerio]
MergeConsencus3870	192.717	278.378	83.0709	37.6699	27.2201	17.1898	0.0251918	7.00793	Swissprot: O18824 8e-53 SCRB1_BOVIN Scavenger receptor class B member 1 OS=Bos taurus GN=SCARB1 PE=2 SV=1|Nr: ref|XP_001660152.1| 2e-90 epithelial membrane protein [Aedes aegypti] gb|EAT48770.1| epithelial membrane protein [Aedes aegypti]|IPR: IPR002159; CD36 antigen|GO: GO:0007155; cell adhesion; Biological Process
MergeConsencus6949	8.98188	8.23734	3.47155	1.26943	0.909403	1.01463	0.0139899	6.95281	Swissprot: Q8BN59 2e-47 LARP6_MOUSE La-related protein 6 OS=Mus musculus GN=Larp6 PE=1 SV=1|Nr: ref|XP_975429.1| 7e-92 PREDICTED: similar to acheron [Tribolium castaneum]|Cog: SPAC57A10.10c 6e-09 --|Kegg: bpm:BURPS1710b_1520 2e-19 recB; exodeoxyribonuclease V, beta subunit [EC:3.1.11.5]; K03582 exodeoxyribonuclease V beta subunit
MergeConsencus5915	8.0007	9.08267	11.5873	1.29972	1.96566	2.28546	0.00109678	6.87261	Swissprot: P46333 1e-23 CSBC_BACSU Probable metabolite transport protein csbC OS=Bacillus subtilis GN=csbC PE=1 SV=3|Nr: ref|XP_975260.1| 7e-94 PREDICTED: similar to AGAP012218-PA [Tribolium castaneum]|IPR: IPR005828; General substrate transporter
MergeConsencus36128	21.4287	9.19289	19.9969	2.86486	4.99513	2.50791	0.0135661	6.7231	Swissprot: Q964R1 2e-92 CP6J1_BLAGE Cytochrome P450 6j1 OS=Blattella germanica GN=CYP6J1 PE=2 SV=1|Nr: ref|XP_970485.1| 1e-94 PREDICTED: similar to antennae-rich cytochrome P450 [Tribolium castaneum]|IPR: IPR001128; Cytochrome P450
MergeConsencus43366	1.04279	2.86088	3.33183	0.884281	0.156417	0.471194	0.0294914	6.60596	Swissprot: Q9H172 1e-108 ABCG4_HUMAN ATP-binding cassette sub-family G member 4 OS=Homo sapiens GN=ABCG4 PE=2 SV=2|Nr: ref|XP_001863365.1| 1e-144 abc transporter [Culex quinquefasciatus] gb|EDS38492.1| abc transporter [Culex quinquefasciatus]|IPR: IPR003439; ABC transporter-like
MergeConsencus13841	8.15632	11.7877	11.0336	1.6811	2.67626	1.91953	0.000995191	6.4134	Swissprot: P97584 1e-81 PTGR1_RAT Prostaglandin reductase 1 OS=Rattus norvegicus GN=Ptgr1 PE=2 SV=3|Nr: ref|XP_001603755.1| 1e-110 PREDICTED: similar to alcohol dehydrogenase [Nasonia vitripennis]|IPR: IPR011032; GroES-like
MergeConsencus24523	11.2188	10.0871	6.75925	1.63221	2.96964	0.931858	0.00343402	6.19048	Swissprot: Q29073 5e-84 PTGR1_PIG Prostaglandin reductase 1 OS=Sus scrofa GN=PTGR1 PE=1 SV=1|Nr: ref|XP_001603755.1| 1e-115 PREDICTED: similar to alcohol dehydrogenase [Nasonia vitripennis]|IPR: IPR011032; GroES-like
Contig4441	1646.84	1031.61	561.828	352.112	114.085	160.657	0.0270094	5.94785	Swissprot: Q17127 4e-51 HEXA_BLADI Hexamerin OS=Blaberus discoidalis PE=2 SV=1|Nr: gb|AAX62654.1| 1e-127 hexamerin storage protein 3 [Romalea microptera]|Nt: gb|AY963295.1| 5e-68 Romalea microptera hexamerin storage protein 3 mRNA, complete cds|Cog: Rv0312 6e-06 --|Kegg: dme:Dmel_CG6806 1e-30 Lsp2; Larval serum protein 2 [EC:3.4.17.1]; K01290 carboxypeptidase A
Contig1093	4.56652	2.44055	4.49269	0	0.467024	1.40688	0.00833872	5.8507	Nr: ref|XP_001950371.1| 6e-22 PREDICTED: similar to ryanodine receptor-like protein [Acyrthosiphon pisum]
MergeConsencus17961	9.32639	7.67603	7.44971	3.95437	1.74867	0	0.00416189	5.81467	Swissprot: P41509 2e-70 FABPM_LOCMI Fatty acid-binding protein, muscle OS=Locusta migratoria PE=1 SV=2|Nr: sp|P41509|FABPM_LOCMI 3e-69 RecName: Full=Fatty acid-binding protein, muscle; AltName: Full=M-FABP pdb|2FLJ|A Chain A, Fatty Acid Binding Protein From Locust Flight Muscle In Complex With Oleate gb|AAB30739.1| M-FABP [Locusta migratoria]|Kegg: gga:419557 1e-21 FABP3; fatty acid binding prote…
MergeConsencus8001	3.67856	5.35498	6.635	2.72329	0.985317	0.19788	0.0129929	5.75361	Nr: ref|XP_966682.1| 8e-20 PREDICTED: similar to icarapin variant 2 isoform 1 [Tribolium castaneum]
MergeConsencus8778	926.553	444.816	268.782	46.8986	56.4785	195.828	0.0458964	5.72664	Swissprot: Q6S6W0 1e-33 VGLX_EHV1V Glycoprotein X OS=Equine herpesvirus 1 (strain V592) GN=71 PE=4 SV=1|Nr: ref|XP_001599474.1| 2e-73 PREDICTED: hypothetical protein [Nasonia vitripennis]|Cog: XF0818 2e-11 --|Kegg: sce:YIR019C 8e-17 MUC1, STA4, FLO11; GPI-anchored cell surface glycoprotein (flocculin) required for pseudohyphal formation, invasive growth, flocculation, and biofilms; transcriptiona…
Contig3208	52.8784	40.816	55.5409	15.9738	9.08205	10.4876	0.00080894	5.65499	Swissprot: Q9W1C9 2e-32 PEB3_DROME Ejaculatory bulb-specific protein 3 OS=Drosophila melanogaster GN=PebIII PE=1 SV=2|Nr: emb|CAJ01473.1| 2e-68 hypothetical protein [Locusta migratoria]|Nt: emb|AJ973426.1| 0.0 Locusta migratoria mRNA for hypothetical protein (ORF12), clone lmigEST12
MergeConsencus13948	49.9357	70.98	103.119	14.1419	21.4998	19.3389	0.0112951	5.59585	Swissprot: Q27601 0.0 PUR1_DROME Amidophosphoribosyltransferase OS=Drosophila melanogaster GN=Prat PE=1 SV=2|Nr: ref|XP_001605718.1| 0.0 PREDICTED: similar to ENSANGP00000019430 [Nasonia vitripennis]|IPR: IPR000583; Glutamine amidotransferase, class-II
MergeConsencus69328	10.6192	10.8643	19.7224	4.87287	3.41328	2.18109	0.0148013	5.56995	Swissprot: Q964R0 1e-103 CP6K1_BLAGE Cytochrome P450 6k1 OS=Blattella germanica GN=CYP6K1 PE=2 SV=1|Nr: dbj|BAD84176.1| 1e-125 cytochrome P450 [Hodotermopsis sjoestedti]|IPR: IPR001128; Cytochrome P450
MergeConsencus21756	5.02102	5.69276	13.1687	1.77408	3.22776	1.62057	0.0483255	5.5088	Swissprot: Q922W5 4e-59 P5CR1_MOUSE Pyrroline-5-carboxylate reductase 1, mitochondrial OS=Mus musculus GN=Pycr1 PE=1 SV=1|Nr: gb|EEB16926.1| 1e-83 Pyrroline-5-carboxylate reductase, putative [Pediculus humanus corporis]|IPR: IPR000304; Delta 1-pyrroline-5-carboxylate reductase
MergeConsencus522	7.23683	9.68566	9.70049	3.15544	1.12593	2.17422	0.00130783	5.33964	Nr: gb|ABD33166.1| 2e-08 Nucleic acid-binding, OB-fold [Medicago truncatula]
MergeConsencus17118	5.97382	4.34812	10.9948	1.20614	2.24015	2.24944	0.0311605	5.26958	Swissprot: Q6RHW0 3e-07 K1C9_MOUSE Keratin, type I cytoskeletal 9 OS=Mus musculus GN=Krt9 PE=1 SV=2|Nr: gb|AAC32606.1| 1e-08 fibroin [Antheraea pernyi]|Cog: XF1267 7e-07 --|Kegg: mmu:107656 1e-06 Krt9; keratin 9; K07604 type I keratin, acidic
MergeConsencus18506	5361.51	2973.84	3376.3	1935.92	557.64	500.636	0.0146528	5.17838	Swissprot: Q8MSU3 2e-08 FRRS1_DROME Putative ferric-chelate reductase 1 homolog OS=Drosophila melanogaster GN=CG8399 PE=2 SV=1|Nr: gb|AAA29283.1| 7e-28 basic 19k protein precursor prf||1515168A hemolymph protein 19kD
MergeConsencus7205	2.96924	4.12593	4.03409	1.1445	1.01223	0.711496	0.00108884	5.13321	Swissprot: Q99MS0 5e-73 S14L2_RAT SEC14-like protein 2 OS=Rattus norvegicus GN=Sec14l2 PE=1 SV=1|Nr: ref|XP_001606855.1| 1e-121 PREDICTED: similar to CRAL/TRIO domain-containing protein [Nasonia vitripennis]|IPR: IPR000348; emp24/gp25L/p24
MergeConsencus14408	10.1548	11.3243	9.4683	1.62755	1.88437	3.78436	0.000410252	5.12203	Swissprot: P00503 1e-124 AATC_PIG Aspartate aminotransferase, cytoplasmic OS=Sus scrofa GN=GOT1 PE=1 SV=3|Nr: ref|XP_001601449.1| 1e-138 PREDICTED: similar to ENSANGP00000011707 [Nasonia vitripennis]|IPR: IPR000796; Aspartate/other aminotransferase
Contig4032	21.7372	15.4313	15.535	5.79656	4.61397	2.77985	0.00216649	5.08928	Swissprot: Q9W1C9 2e-32 PEB3_DROME Ejaculatory bulb-specific protein 3 OS=Drosophila melanogaster GN=PebIII PE=1 SV=2|Nr: emb|CAJ01473.1| 8e-67 hypothetical protein [Locusta migratoria]|Nt: emb|AJ973426.1| 0.0 Locusta migratoria mRNA for hypothetical protein (ORF12), clone lmigEST12|Kegg: dme:Dmel_CG3373 2e-06 Hmu; Hemomucin [EC:4.3.3.2]; K01757 strictosidine synthase
MergeConsencus12893	1.88536	1.58341	2.35961	0.888212	0.303001	0.405676	0.00408356	4.97355	Swissprot: Q80SY5 1e-110 PR38B_MOUSE Pre-mRNA-splicing factor 38B OS=Mus musculus GN=Prpf38b PE=1 SV=1|Nr: ref|XP_002237097.1| 1e-114 hypothetical protein BRAFLDRAFT_129046 [Branchiostoma floridae] gb|EEA43422.1| hypothetical protein BRAFLDRAFT_129046 [Branchiostoma floridae]|Cog: PA2976 1e-09 --|Kegg: pfa:PFL0625c 8e-31 eukaryotic translation initiation factor 3 subunit 10, putative; K03254 tran…
MergeConsencus49344	15.6698	20.9655	36.3388	10.3096	9.42203	2.44157	0.0321514	4.95816	Swissprot: A7MCY6 6e-06 TBKB1_HUMAN TANK-binding kinase 1-binding protein OS=Homo sapiens GN=TBKBP1 PE=2 SV=1|Nr: ref|XP_001848961.1| 4e-25 adenylate cyclase [Culex quinquefasciatus] gb|EDS29420.1| adenylate cyclase [Culex quinquefasciatus]
MergeConsencus33167	7.1846	10.4588	5.55377	3.38473	1.53954	0.772958	0.0117636	4.94796	Swissprot: Q6ZZY0 5e-19 CRY1_SYLBO Cryptochrome-1 OS=Sylvia borin GN=CRY1 PE=2 SV=1|Nr: ref|XP_002232981.1| 3e-19 hypothetical protein BRAFLDRAFT_230263 [Branchiostoma floridae] gb|EEA47491.1| hypothetical protein BRAFLDRAFT_230263 [Branchiostoma floridae]|IPR: IPR005101; DNA photolyase, FAD-binding/Cryptochrome, C-terminal|GO: GO:0003913; DNA photolyase activity; Molecular Function
MergeConsencus4884	3.68202	4.41092	2.0407	0.981867	0.703395	0.627831	0.0106385	4.87028	Swissprot: P45844 1e-121 ABCG1_HUMAN ATP-binding cassette sub-family G member 1 OS=Homo sapiens GN=ABCG1 PE=2 SV=3|Nr: ref|XP_971210.2| 1e-167 PREDICTED: similar to CG17646 CG17646-PA [Tribolium castaneum]|IPR: IPR003439; ABC transporter-like
MergeConsencus4993	5.36118	5.84232	6.57016	2.21769	0.882622	1.62484	0.000567471	4.85451	Swissprot: Q19QT7 1e-126 CGL_PIG Cystathionine gamma-lyase OS=Sus scrofa GN=CTH PE=2 SV=1|Nr: ref|XP_001648394.1| 1e-141 cystathionine beta-lyase [Aedes aegypti] gb|EAT44603.1| cystathionine beta-lyase [Aedes aegypti]|IPR: IPR000277; Cys/Met metabolism, pyridoxal phosphate-dependent enzyme
MergeConsencus23741	14400.6	10038.8	5900.42	1609.57	1742.26	3443.68	0.017949	4.83012	Swissprot: Q9QZU7 3e-06 BODG_RAT Gamma-butyrobetaine dioxygenase OS=Rattus norvegicus GN=Bbox1 PE=1 SV=1|Nr: ref|XP_002048713.1| 5e-10 GJ21194 [Drosophila virilis] gb|EDW59906.1| GJ21194 [Drosophila virilis]|Kegg: dpo:Dpse_GA18803 1e-09 GA18803-PA [EC:1.14.11.1]; K00471 gamma-butyrobetaine dioxygenase
Contig4124	4.44708	7.84316	12.5228	1.79576	2.50145	2.87064	0.0337445	4.81033	Swissprot: P46470 3e-32 PRS8_XENLA 26S protease regulatory subunit 8 OS=Xenopus laevis GN=psmc5 PE=2 SV=2|Nr: gb|ACH44939.1| 5e-31 putative proteasome 26S subunit ATPase 5 variant 1 [Taeniopygia guttata]|Cog: YGL048c 2e-23 --|Kegg: xtr:394988 8e-32 MGC75584; hypothetical protein MGC75584; K03066 26S proteasome regulatory subunit T6
MergeConsencus28260	2.10231	2.28171	1.87513	0.457116	0.545786	0.548047	0.000103227	4.78743	Nr: ref|XP_001659748.1| 5e-15 zinc/iron transporter [Aedes aegypti] gb|EAT47262.1| zinc/iron transporter [Aedes aegypti]
MergeConsencus40380	2.71606	1.91609	0.944796	0.383868	0.458329	0.460229	0.0249371	4.71771	Swissprot: Q9VTG7 1e-88 B3G2P_DROME Galactosylgalactosylxylosylprotein 3-beta-glucuronosyltransferase P OS=Drosophila melanogaster GN=GlcAT-P PE=2 SV=1|Nr: gb|EEB10296.1| 1e-104 glucuronyltransferase-S, putative [Pediculus humanus corporis]|IPR: IPR005027; Glycosyl transferase, family 43|GO: GO:0015018; galactosylgalactosylxylosylprotein 3-beta-glucuronosyltransferase activity; Molecular Function
MergeConsencus33125	11.4379	15.3696	31.0719	4.6187	8.82339	3.69165	0.0468522	4.71563	Swissprot: Q86AH4 5e-18 Y8592_DICDI Putative uncharacterized protein DDB_0168592 OS=Dictyostelium discoideum GN=DDB_0168592 PE=4 SV=1|Nr: ref|XP_001017693.1| 4e-18 hypothetical protein [Tetrahymena thermophila SB210] gb|EAR97448.1| hypothetical protein TTHERM_01009840 [Tetrahymena thermophila SB210]|Kegg: ddi:DDB_0191270 3e-12 trfA; hypothetical protein; K06665 glucose repression mediator protein
MergeConsencus23285	1.73657	3.61246	2.8913	0.943979	1.05195	0.150901	0.014986	4.71551	Nr: ref|XP_001947861.1| 3e-59 PREDICTED: similar to p20-CGGBP [Acyrthosiphon pisum]
Contig4403	77.2721	98.6626	92.8649	19.9082	37.5791	14.5484	0.00112937	4.67405	Swissprot: Q765P3 3e-52 PGRP2_HOLDI Peptidoglycan-recognition protein 2 OS=Holotrichia diomphalia GN=PGRP-2 PE=1 SV=1|Nr: ref|XP_969883.1| 8e-53 PREDICTED: similar to Tm-peptidoglycan recogntition protein-SA [Tribolium castaneum]|Nt: ref|XM_001967756.1| 4e-07 Drosophila ananassae GF21643 (Dana\GF21643), mRNA|Cog: Rv3811 1e-12 --|Kegg: dme:Dmel_CG11709 1e-49 PGRP-SA; Peptidoglycan recognition prot…
MergeConsencus48518	4.17293	6.49771	10.0259	1.91277	2.15692	2.42067	0.0250924	4.6594	Swissprot: Q9HAW9 2e-67 UD18_HUMAN UDP-glucuronosyltransferase 1-8 OS=Homo sapiens GN=UGT1A8 PE=2 SV=1|Nr: ref|XP_001663166.1| 1e-124 glucosyl/glucuronosyl transferases [Aedes aegypti] gb|EAT45643.1| glucosyl/glucuronosyl transferases [Aedes aegypti]|IPR: IPR002213; UDP-glucuronosyl/UDP-glucosyltransferase
MergeConsencus28874	17.0691	31.0165	13.3446	6.30521	5.67348	2.62938	0.0234496	4.65195	Swissprot: Q05B81 4e-08 PCFT_BOVIN Proton-coupled folate transporter OS=Bos taurus GN=SLC46A1 PE=2 SV=1|Nr: ref|XP_001848961.1| 2e-50 adenylate cyclase [Culex quinquefasciatus] gb|EDS29420.1| adenylate cyclase [Culex quinquefasciatus]|IPR: IPR016196; MFS general substrate transporter
MergeConsencus25099	10.572	15.4745	12.8421	4.57398	2.10358	4.06211	0.00213055	4.6023	Nr: gb|ABN58714.1| 5e-20 pol-like protein [Biomphalaria glabrata]|IPR: IPR012337; Polynucleotidyl transferase, Ribonuclease H fold|GO: GO:0003676; nucleic acid binding; Molecular Function
MergeConsencus38241	2.25976	2.24821	2.41868	0.491351	0.586662	0.785457	4.00102e-05	4.57286	Nr: ref|XP_001949706.1| 8e-10 PREDICTED: similar to conserved hypothetical protein [Acyrthosiphon pisum]
MergeConsencus13643	63.8867	79.7797	58.1159	16.2064	17.1677	19.2841	0.000804286	4.51201	Swissprot: Q5R5H1 5e-57 METK2_PONAB S-adenosylmethionine synthetase isoform type-2 OS=Pongo abelii GN=MAT2A PE=2 SV=1|Nr: ref|XP_623669.2| 3e-59 PREDICTED: similar to Minute (2) 21AB CG2674-PC, isoform C isoform 2 [Apis mellifera]|IPR: IPR002133; S-adenosylmethionine synthetase|GO: GO:0004478; methionine adenosyltransferase activity; Molecular Function
Contig2064	60.5036	83.826	129.586	20.1523	29.0471	34.3915	0.0187696	4.4841	Swissprot: Q91ZJ5 1e-24 UGPA_MOUSE UTP--glucose-1-phosphate uridylyltransferase OS=Mus musculus GN=Ugp2 PE=2 SV=3|Nr: ref|XP_001847482.1| 4e-26 utp-glucose-1-phosphate uridylyltransferase 2 [Culex quinquefasciatus] gb|EDS26266.1| utp-glucose-1-phosphate uridylyltransferase 2 [Culex quinquefasciatus]|Cog: SPCC1322.04 9e-18 --|Kegg: dme:Dmel_CG4347 1e-26 UGP; UGP [EC:2.7.7.9]; K00963 UTP--glucose-1…
MergeConsencus2563	23.8708	25.9565	57.1608	11.4148	12.3166	12.1649	0.0463057	4.45012	Nr: ref|XP_001815977.1| 2e-08 PREDICTED: similar to Kaz1-ORFB CG1220-PE [Tribolium castaneum]
MergeConsencus33175	2.01826	4.27144	6.55258	1.71147	1.81641	0.455984	0.0495586	4.40463	Swissprot: O77237 7e-18 PELI_DROME Protein pellino OS=Drosophila melanogaster GN=Pli PE=1 SV=1|Nr: ref|XP_313144.2| 3e-17 AGAP004232-PA [Anopheles gambiae str. PEST] gb|EAA08618.3| AGAP004232-PA [Anopheles gambiae str. PEST]
MergeConsencus9654	2.1723	8.0273	4.6778	1.53508	1.04734	1.28539	0.0486422	4.40074	Swissprot: Q8NBD8 3e-19 CN083_HUMAN Transmembrane protein C14orf83 OS=Homo sapiens GN=C14orf83 PE=2 SV=1|Nr: gb|EEC15276.1| 1e-36 conserved hypothetical protein [Ixodes scapularis]
MergeConsencus15251	142.431	171.358	193.597	58.744	55.2475	40.8222	0.000871273	4.39314	Swissprot: P32929 1e-135 CGL_HUMAN Cystathionine gamma-lyase OS=Homo sapiens GN=CTH PE=1 SV=3|Nr: ref|XP_001648394.1| 1e-149 cystathionine beta-lyase [Aedes aegypti] gb|EAT44603.1| cystathionine beta-lyase [Aedes aegypti]|IPR: IPR000277; Cys/Met metabolism, pyridoxal phosphate-dependent enzyme
MergeConsencus55300	1.74851	4.49719	5.40647	0.926705	2.08999	0.61725	0.0437825	4.38757	Swissprot: P35502 3e-78 ESTF_MYZPE Esterase FE4 OS=Myzus persicae PE=1 SV=1|Nr: ref|XP_967137.1| 1e-125 PREDICTED: similar to juvenile hormone esterase [Tribolium castaneum]|IPR: IPR000886; Endoplasmic reticulum, targeting sequence
MergeConsencus4808	3.03387	7.59459	6.95999	1.93645	2.42217	0.994994	0.0258602	4.35464	Swissprot: Q9WTP7 4e-65 KAD3_MOUSE GTP:AMP phosphotransferase mitochondrial OS=Mus musculus GN=Ak3 PE=1 SV=3|Nr: dbj|BAB23876.1| 2e-64 unnamed protein product [Mus musculus]|IPR: IPR000850; Adenylate kinase
MergeConsencus47768	2.33356	4.90986	5.12678	2.083	1.10536	0.971194	0.023393	4.29964	Swissprot: Q9WTP7 3e-65 KAD3_MOUSE GTP:AMP phosphotransferase mitochondrial OS=Mus musculus GN=Ak3 PE=1 SV=3|Nr: dbj|BAB23876.1| 1e-64 unnamed protein product [Mus musculus]|IPR: IPR000850; Adenylate kinase
MergeConsencus18641	44.3	66.1831	21.2473	10.1251	11.5135	9.57926	0.0306633	4.27605	Nr: gb|EEB20165.1| 6e-37 conserved hypothetical protein [Pediculus humanus corporis]
MergeConsencus3759	194.302	167.975	187.708	50.265	48.3739	66.7329	9.95717e-05	4.25849	Swissprot: Q765P3 7e-52 PGRP2_HOLDI Peptidoglycan-recognition protein 2 OS=Holotrichia diomphalia GN=PGRP-2 PE=1 SV=1|Nr: ref|XP_969883.1| 2e-52 PREDICTED: similar to Tm-peptidoglycan recogntition protein-SA [Tribolium castaneum]|IPR: IPR002502; N-acetylmuramoyl-L-alanine amidase, family 2
MergeConsencus7293	17.3141	23.1179	15.1988	7.88033	3.63151	4.30957	0.00402857	4.25383	Swissprot: P63255 4e-32 CRIP1_RAT Cysteine-rich protein 1 OS=Rattus norvegicus GN=Crip1 PE=1 SV=2|Nr: ref|XP_001122454.1| 4e-37 PREDICTED: similar to Cysteine-rich protein 1 (Cysteine-rich intestinal protein) (CRIP) [Apis mellifera]|Cog: DR0479 2e-06 --|Kegg: nve:NEMVE_v1g52979 7e-13 NEMVEDRAFT_v1g52979; predicted protein; K09377 cysteine and glycine-rich protein
MergeConsencus5173	4.80793	3.7687	5.3684	0.251673	2.40393	1.4081	0.00668554	4.22603	Swissprot: P06133 3e-21 UD2B4_HUMAN UDP-glucuronosyltransferase 2B4 OS=Homo sapiens GN=UGT2B4 PE=1 SV=2|Nr: ref|XP_972090.1| 9e-27 PREDICTED: similar to AGAP007029-PA [Tribolium castaneum]|Cog: slr1125 7e-06 --|Kegg: rno:289533 1e-21 Ugt2a3_predicted; UDP glucuronosyltransferase 2 family, polypeptide A3 (predicted) [EC:2.4.1.17]; K00699 glucuronosyltransferase
MergeConsencus4512	2.21638	5.61286	5.00807	1.44575	0.958998	1.54075	0.0245964	4.17001	Swissprot: O09174 2e-54 AMACR_MOUSE Alpha-methylacyl-CoA racemase OS=Mus musculus GN=Amacr PE=1 SV=3|Nr: ref|XP_974629.1| 2e-63 PREDICTED: similar to alpha methylacyl-coa racemase [Tribolium castaneum]|IPR: IPR003673; CoA-transferase family III|GO: GO:0003824; catalytic activity; Molecular Function
MergeConsencus49053	6.65175	11.7315	9.67883	5.25355	3.08129	0.773513	0.0161401	4.14449	Swissprot: Q52KI8 2e-09 SRRM1_MOUSE Serine/arginine repetitive matrix protein 1 OS=Mus musculus GN=Srrm1 PE=1 SV=1|Nr: ref|NP_001055411.1| 4e-09 Os05g0383200 [Oryza sativa (japonica cultivar-group)] gb|AAT77325.1| unknown protein [Oryza sativa (japonica cultivar-group)] dbj|BAF17325.1| Os05g0383200 [Oryza sativa (japonica cultivar-group)]|Kegg: cfa:474666 4e-06 SLC27A6, LOC474666; solute carrier …
MergeConsencus13	104.441	112.741	40.9181	10.0757	14.8372	38.052	0.027628	4.10862	Swissprot: O02002 8e-25 CASP1_DROME Caspase-1 OS=Drosophila melanogaster GN=Dcp-1 PE=1 SV=1|Nr: ref|XP_320580.3| 2e-29 caspase short class (AGAP011952-PA) [Anopheles gambiae str. PEST] gb|EAA00684.3| caspase short class (AGAP011952-PA) [Anopheles gambiae str. PEST]|IPR: IPR001309; Peptidase C14, ICE, catalytic subunit p20
MergeConsencus15339	19.1602	25.0062	39.1012	9.74866	11.6397	7.79194	0.0200891	4.10342	Swissprot: P99029 2e-48 PRDX5_MOUSE Peroxiredoxin-5, mitochondrial OS=Mus musculus GN=Prdx5 PE=1 SV=2|Nr: ref|XP_001238545.2| 5e-66 AGAP001325-PA [Anopheles gambiae str. PEST] gb|EAU75715.2| AGAP001325-PA [Anopheles gambiae str. PEST]|IPR: IPR012336; Thioredoxin-like fold
MergeConsencus18056	48.6825	53.2036	18.0923	7.05684	17.378	5.28788	0.0306164	4.10128	Swissprot: Q3T0C2 5e-40 PGDH_BOVIN 15-hydroxyprostaglandin dehydrogenase [NAD+] OS=Bos taurus GN=HPGD PE=2 SV=1|Nr: gb|AAR84629.1| 2e-73 putative alcohol dehydrogenase [Gryllotalpa orientalis]|Cog: lin2278 3e-25 --|Kegg: gga:422567 1e-44 HPGD; hydroxyprostaglandin dehydrogenase 15-(NAD) [EC:1.1.1.141]; K00069 15-hydroxyprostaglandin dehydrogenase (NAD)
MergeConsencus45289	1.47471	2.16742	1.28247	0.260531	0.829516	0.208238	0.0112271	4.0891	Swissprot: O95848 2e-45 NUD14_HUMAN Uridine diphosphate glucose pyrophosphatase OS=Homo sapiens GN=NUDT14 PE=1 SV=2|Nr: ref|XP_975594.1| 1e-59 PREDICTED: similar to UDP-glucose pyrophosphatase [Tribolium castaneum]|IPR: IPR000086; NUDIX hydrolase, core
MergeConsencus24937	1.59569	2.06379	1.85023	0.451045	0.897562	0.360512	0.00204454	4.08551	Swissprot: Q5SPP0 2e-34 RLBL2_DANRE Retinaldehyde-binding protein 1-like protein 2 OS=Danio rerio GN=rlbp1l2 PE=2 SV=1|Nr: ref|XP_001848586.1| 4e-39 conserved hypothetical protein [Culex quinquefasciatus] gb|EDS28629.1| conserved hypothetical protein [Culex quinquefasciatus]|IPR: IPR001251; Cellular retinaldehyde-binding/triple function, C-terminal
Contig4378	336.154	600.927	923.785	220.684	215.19	226.27	0.0392038	4.04092	Swissprot: P18298 6e-08 METK2_RAT S-adenosylmethionine synthetase isoform type-2 OS=Rattus norvegicus GN=Mat2a PE=2 SV=1|Nr: ref|XP_001946709.1| 9e-11 PREDICTED: similar to S-adenosylmethionine synthetase [Acyrthosiphon pisum]|Nt: ref|XM_961585.2| 1e-07 PREDICTED: Tribolium castaneum similar to S-adenosylmethionine synthetase, transcript variant 1 (LOC658012), mRNA|Cog: DR0640 9e-06 --|Kegg: dre:…
MergeConsencus14446	87.0635	42.3298	73.2883	26.9613	19.5245	21.2257	0.0142426	4.03211	Swissprot: Q2KIX1 6e-10 GA45G_BOVIN Growth arrest and DNA-damage-inducible protein GADD45 gamma OS=Bos taurus GN=GADD45G PE=2 SV=1|Nr: ref|XP_002089447.1| 3e-17 GE19117 [Drosophila yakuba] gb|EDW89159.1| GE19117 [Drosophila yakuba]|Kegg: dpo:Dpse_GA10750 6e-17 GA10750-PA; K04402 growth arrest and DNA-damage-inducible protein
MergeConsencus7080	55.9275	42.1527	52.1008	17.6618	19.5897	12.2654	0.000980815	4.03073	Nr: ref|XP_001945317.1| 7e-06 PREDICTED: hypothetical protein [Acyrthosiphon pisum] ref|XP_001950173.1| PREDICTED: hypothetical protein [Acyrthosiphon pisum]
MergeConsencus17279	115.884	113.396	68.8921	28.5457	22.1539	33.3686	0.00512041	4.00462	Swissprot: P49756 5e-11 RBM25_HUMAN Probable RNA-binding protein 25 OS=Homo sapiens GN=RBM25 PE=1 SV=2|Nr: ref|XP_001747120.1| 5e-11 hypothetical protein [Monosiga brevicollis MX1] gb|EDQ88044.1| predicted protein [Monosiga brevicollis MX1]|IPR: IPR002119; Histone H2A
MergeConsencus55786	1.36261	1.68645	2.05119	0.709509	0.645438	0.324056	0.00397135	3.962	Swissprot: Q9WUN2 1e-132 TBK1_MOUSE Serine/threonine-protein kinase TBK1 OS=Mus musculus GN=Tbk1 PE=1 SV=1|Nr: gb|EEB15763.1| 0.0 serine/threonine-protein kinase TBK1, putative [Pediculus humanus corporis]|IPR: IPR000719; Protein kinase, core
MergeConsencus14419	2.44975	6.60083	4.5764	2.3082	0.918644	1.15306	0.036334	3.88276	Swissprot: Q9CQX2 5e-16 CYB5B_MOUSE Cytochrome b5 type B OS=Mus musculus GN=Cyb5b PE=1 SV=1|Nr: ref|XP_001649539.1| 3e-21 hypothetical protein AaeL_AAEL014754 [Aedes aegypti] gb|EAT32988.1| conserved hypothetical protein [Aedes aegypti]|IPR: IPR001199; Cytochrome b5|GO: GO:0020037; heme binding; Molecular Function
MergeConsencus3438	4.12159	4.57685	4.24805	1.83384	0.515192	1.89687	0.00175693	3.84444	Swissprot: P20711 5e-11 DDC_HUMAN Aromatic-L-amino-acid decarboxylase OS=Homo sapiens GN=DDC PE=1 SV=1|Nr: ref|XP_394423.3| 3e-32 PREDICTED: similar to Tdc2 CG30446-PA isoform 1 [Apis mellifera]|Kegg: dme:Dmel_CG30445 2e-19 Tdc1; Tyrosine decarboxylase 1 [EC:4.1.1.25]; K01592 tyrosine decarboxylase
MergeConsencus16755	2.75214	1.38681	2.88723	1.667	0.442302	0.444135	0.0384493	3.84155	Swissprot: Q5R9W6 1e-43 TAF13_PONAB Transcription initiation factor TFIID subunit 13 OS=Pongo abelii GN=TAF13 PE=2 SV=1|Nr: ref|XP_001606443.1| 6e-53 PREDICTED: similar to TATA box binding protein (TBP)-associated factor, putative [Nasonia vitripennis]|IPR: IPR003195; Transcription initiation factor IID, 18 kDa subunit
MergeConsencus14148	1.41402	3.69462	1.57886	0.666159	0.707003	0.532449	0.0481607	3.81625	Nr: ref|XP_001607314.1| 1e-20 PREDICTED: hypothetical protein [Nasonia vitripennis]
Contig61	14.6264	23.3394	12.114	8.12112	0.587662	5.90097	0.0219467	3.81471	Nr: gb|AAW22542.1| 3e-06 myosin light chain [Gryllotalpa orientalis]|Nt: gb|FJ156107.1| 2e-09 Bombyx mandarina myosin light chain 2 protein (MLC2) gene, complete cds
MergeConsencus14263	72.2946	82.5668	61.9694	9.9541	29.8289	25.5064	0.00198645	3.80745	Swissprot: P41479 3e-11 Y091_NPVAC Uncharacterized 24.1 kDa protein in LEF4-P33 intergenic region OS=Autographa californica nuclear polyhedrosis virus PE=4 SV=1|Nr: ref|YP_294122.1| 4e-11 hypothetical protein EhV364 [Emiliania huxleyi virus 86] emb|CAI65791.1| putative membrane protein [Emiliania huxleyi virus 86]|Cog: XF0818 5e-06 --|Kegg: cya:CYA_2262 1e-07 protein kinase [EC:2.7.1.37]; K00870 …
Contig4750	99.1832	120.547	48.2544	21.5368	29.3235	22.348	0.0198157	3.80412	Swissprot: Q99K85 1e-121 SERC_MOUSE Phosphoserine aminotransferase OS=Mus musculus GN=Psat1 PE=1 SV=1|Nr: gb|EEB18599.1| 1e-128 phosphoserine aminotransferase, putative [Pediculus humanus corporis]|Cog: PA3167 1e-102 --|Kegg: dre:327512 1e-127 psat1; phosphoserine aminotransferase 1 [EC:2.6.1.52]; K00831 phosphoserine aminotransferase
MergeConsencus11932	32.1388	49.8412	32.9393	10.4159	10.2857	14.7726	0.00564417	3.75765	Swissprot: Q9PW70 3e-24 CISH_CHICK Cytokine-inducible SH2-containing protein OS=Gallus gallus GN=CISH PE=2 SV=1|Nr: ref|XP_972490.1| 1e-38 PREDICTED: similar to suppressor of cytokine signaling 2 [Tribolium castaneum]|IPR: IPR000980; SH2 motif
Contig3578	2.54514	5.79802	3.19707	0.44964	1.07372	1.61725	0.0279533	3.7234	Nt: gb|BC104601.1| 1e-07 Bos taurus LRRN4 C-terminal like, mRNA (cDNA clone IMAGE:8121028), partial cds
MergeConsencus7233	186.199	277.461	305.778	131.343	68.2811	80.7975	0.00816661	3.6988	Swissprot: P07900 0.0 HS90A_HUMAN Heat shock protein HSP 90-alpha OS=Homo sapiens GN=HSP90AA1 PE=1 SV=5|Nr: gb|AAS45246.2| 0.0 heat shock protein 90 [Locusta migratoria]|IPR: IPR001404; Heat shock protein Hsp90
MergeConsencus14916	2.18396	2.90279	4.84448	1.20782	1.70916	0.858123	0.0346184	3.69501	Swissprot: O61577 1e-157 KTNA1_STRPU Katanin p60 ATPase-containing subunit OS=Strongylocentrotus purpuratus GN=KATNA1 PE=1 SV=1|Nr: gb|EEB10976.1| 0.0 Katanin p60 ATPase-containing subunit, putative [Pediculus humanus corporis]|IPR: IPR003593; AAA+ ATPase, core
MergeConsencus33089	198.353	207.94	106.687	24.9951	48.764	74.4284	0.0130763	3.66321	Nr: ref|XP_001606954.1| 1e-12 PREDICTED: similar to ENSANGP00000016729, partial [Nasonia vitripennis]
MergeConsencus24098	1.79008	1.89426	1.38375	1.26498	0.503453	0	0.0255706	3.6619	Swissprot: P54729 2e-82 NUB1_MOUSE NEDD8 ultimate buster 1 OS=Mus musculus GN=Nub1 PE=1 SV=2|Nr: ref|XP_974348.2| 1e-127 PREDICTED: similar to GA13736-PA [Tribolium castaneum]|IPR: IPR000449; Ubiquitin-associated/translation elongation factor EF1B, N-terminal
MergeConsencus44922	4.3986	5.39663	3.9915	2.16231	1.29088	1.51226	0.00197773	3.65549	Swissprot: O18404 3e-18 HCD2_DROME 3-hydroxyacyl-CoA dehydrogenase type-2 OS=Drosophila melanogaster GN=scu PE=1 SV=1|Nr: ref|XP_780014.1| 3e-17 PREDICTED: similar to Hadh2-prov protein isoform 1 [Strongylocentrotus purpuratus] ref|XP_001177801.1| PREDICTED: similar to Hadh2-prov protein isoform 2 [Strongylocentrotus purpuratus]|IPR: IPR002347; Glucose/ribitol dehydrogenase
MergeConsencus17361	1105.98	1078.37	1491.21	428.504	415.746	524.256	0.00251289	3.6244	Swissprot: Q2IPZ7 3e-06 IF2_ANADE Translation initiation factor IF-2 OS=Anaeromyxobacter dehalogenans (strain 2CP-C) GN=infB PE=3 SV=1|Nr: ref|XP_002078476.1| 9e-11 GD22512 [Drosophila simulans] gb|EDX04061.1| GD22512 [Drosophila simulans]|Kegg: ade:Adeh_1102 7e-06 bacterial translation initiation factor 2 (bIF-2); K02519 translation initiation factor IF-2
MergeConsencus16918	1.74728	3.78444	2.06154	0.51989	0.827648	0.831078	0.0240779	3.59272	Swissprot: Q86WA9 1e-103 S2611_HUMAN Sodium-independent sulfate anion transporter OS=Homo sapiens GN=SLC26A11 PE=2 SV=2|Nr: ref|XP_001662167.1| 1e-153 sulfate transporter [Aedes aegypti] gb|EAT35825.1| sulfate transporter [Aedes aegypti]|IPR: IPR002645; Sulphate transporter/antisigma-factor antagonist STAS
MergeConsencus34842	1.3067	1.89095	2.87489	1.27855	0.678472	0.681283	0.0417821	3.56165	Nr: ref|XP_002098906.1| 1e-15 GE23677 [Drosophila yakuba] gb|EDW98618.1| GE23677 [Drosophila yakuba]
MergeConsencus6803	66.4158	46.7335	87.5162	30.6246	24.3767	26.2158	0.0144154	3.50682	Swissprot: Q91ZJ5 1e-166 UGPA_MOUSE UTP--glucose-1-phosphate uridylyltransferase OS=Mus musculus GN=Ugp2 PE=2 SV=3|Nr: ref|XP_001847482.1| 0.0 utp-glucose-1-phosphate uridylyltransferase 2 [Culex quinquefasciatus] gb|EDS26266.1| utp-glucose-1-phosphate uridylyltransferase 2 [Culex quinquefasciatus]|Cog: SPCC1322.04 1e-136 --|Kegg: dme:Dmel_CG4347 0.0 UGP; UGP [EC:2.7.7.9]; K00963 UTP--glucose-1-p…
MergeConsencus14470	5.35732	4.72426	9.83551	2.83936	1.50673	3.78243	0.0433469	3.49644	Swissprot: P00984 2e-09 IVBIE_DENPO Dendrotoxin-E OS=Dendroaspis polylepis polylepis PE=1 SV=1|Nr: ref|XP_002122647.1| 2e-08 PREDICTED: similar to Kunitz-like protease inhibitor [Ciona intestinalis]|Kegg: rno:29436 6e-09 Tfpi; tissue factor pathway inhibitor; K03909 tissue factor pathway inhibitor
MergeConsencus2260	64.0901	96.8506	28.9133	14.5522	21.7483	19.7021	0.0432873	3.48698	Swissprot: Q9H4Y5 3e-25 GSTO2_HUMAN Glutathione transferase omega-2 OS=Homo sapiens GN=GSTO2 PE=2 SV=1|Nr: ref|XP_971247.1| 2e-33 PREDICTED: similar to CG6776 CG6776-PA [Tribolium castaneum]|Cog: NMB1953 7e-09 --|Kegg: hsa:119391 7e-25 GSTO2; glutathione S-transferase omega 2 [EC:2.5.1.18]; K00799 glutathione S-transferase
MergeConsencus5287	28.9567	39.5184	37.5728	15.3469	16.2879	8.1777	0.00296148	3.47725	Nr: emb|CAJ01462.1| 2e-08 hypothetical protein [Locusta migratoria]
Contig2345	7.1473	9.37329	14.2374	5.05073	4.32956	2.79482	0.0239143	3.47724	Swissprot: Q9VTY4 1e-28 U459_DROME UPF0459 protein CG10681 OS=Drosophila melanogaster GN=CG10681 PE=1 SV=1|Nr: ref|XP_001122056.1| 9e-44 PREDICTED: similar to CG10681-PA [Apis mellifera]|Nt: ref|XM_965705.1| 1e-12 PREDICTED: Tribolium castaneum similar to AGAP006236-PA (LOC659395), mRNA
MergeConsencus8959	2.27021	1.00097	1.80974	0.902403	0.638488	0.48085	0.0297348	3.46353	Swissprot: P29775 8e-81 ETS4_DROME DNA-binding protein D-ETS-4 OS=Drosophila melanogaster GN=Ets98B PE=2 SV=3|Nr: ref|XP_396511.3| 2e-90 PREDICTED: similar to Ets at 98B CG5583-PA [Apis mellifera]|IPR: IPR000418; Ets
MergeConsencus5143	17.5296	24.9242	17.0316	9.00344	5.21432	6.30296	0.00480832	3.43675	Swissprot: O77237 3e-69 PELI_DROME Protein pellino OS=Drosophila melanogaster GN=Pli PE=1 SV=1|Nr: ref|XP_001601292.1| 1e-73 PREDICTED: similar to Pelle associated protein Pellino [Nasonia vitripennis]|IPR: IPR006800; Pellino
MergeConsencus19779	14.5891	21.389	6.82223	7.12762	2.63411	3.66235	0.0455951	3.42975	Swissprot: O18404 4e-71 HCD2_DROME 3-hydroxyacyl-CoA dehydrogenase type-2 OS=Drosophila melanogaster GN=scu PE=1 SV=1|Nr: ref|XP_001992497.1| 2e-75 GH24783 [Drosophila grimshawi] gb|EDV92204.1| GH24783 [Drosophila grimshawi]|IPR: IPR002198; Short-chain dehydrogenase/reductase SDR
Contig4782	5.50103	3.12967	7.95602	3.26038	1.99631	2.00459	0.0497636	3.36424	Swissprot: Q6PZE0 2e-11 MUC19_MOUSE Mucin-19 OS=Mus musculus GN=Muc19 PE=2 SV=2|Nr: ref|XP_320597.3| 1e-109 AGAP011936-PA [Anopheles gambiae str. PEST] gb|EAA00275.3| AGAP011936-PA [Anopheles gambiae str. PEST]|Nt: dbj|AK283372.1| 1e-164 Gryllus bimaculatus mRNA, GBcontig30233|Kegg: pic:PICST_25832 2e-08 CRH1; cell wall protein in family of putative glycosidases Probable xyloglucan endotransgluco…
MergeConsencus14400	4.38065	3.00456	2.39862	1.28985	1.0267	1.03096	0.0111872	3.33665	Swissprot: Q04833 2e-31 LRP_CAEEL Low-density lipoprotein receptor-related protein OS=Caenorhabditis elegans GN=lrp-1 PE=1 SV=1|Nr: gb|EEC19449.1| 1e-46 low-density lipoprotein receptor, putative [Ixodes scapularis]|IPR: IPR000152; Aspartic acid and asparagine hydroxylation site
Contig4204	207.241	329.225	341.76	94.3787	77.9735	163.096	0.0113411	3.33168	Swissprot: P28493 4e-58 PR5_ARATH Pathogenesis-related protein 5 OS=Arabidopsis thaliana GN=At1g75040 PE=1 SV=1|Nr: gb|AAS83110.1| 1e-114 thaumatin-like protein 2 [Schistocerca gregaria]|Nt: gb|AY512592.1| 1e-108 Schistocerca gregaria thaumatin-like protein 2 (Tau2) mRNA, complete cds|Cog: CC3441 6e-07 --|Kegg: lpl:lp_3093 2e-10 muramidase (putative) [EC:3.2.1.17]; K01185 lysozyme
MergeConsencus4275	8.89073	12.5603	6.91221	3.42476	2.84124	3.3735	0.00998894	3.30198	Swissprot: P11420 9e-76 DA_DROME Protein daughterless OS=Drosophila melanogaster GN=da PE=1 SV=1|Nr: ref|XP_394032.3| 1e-146 PREDICTED: similar to Protein daughterless [Apis mellifera]|IPR: IPR001092; Basic helix-loop-helix dimerisation region bHLH
MergeConsencus11308	3.31751	3.12052	5.64183	2.18807	1.74167	1.62396	0.0291409	3.28657	Swissprot: Q9JI44 1e-145 DMAP1_MOUSE DNA methyltransferase 1-associated protein 1 OS=Mus musculus GN=Dmap1 PE=1 SV=1|Nr: ref|XP_392117.2| 1e-153 PREDICTED: similar to DNA methyltransferase 1 associated protein 1 [Apis mellifera]|IPR: IPR008468; DNA methyltransferase 1-associated 1
MergeConsencus70813	2.99997	2.64547	4.83127	1.05998	0.84373	2.54168	0.0400538	3.27547	Swissprot: Q4V8I5 7e-40 AR6P4_RAT ADP-ribosylation factor-like protein 6-interacting protein 4 OS=Rattus norvegicus GN=Arl6ip4 PE=2 SV=1|Nr: ref|XP_001121270.1| 2e-44 PREDICTED: similar to ADP-ribosylation factor-like 6 interacting protein 4 [Apis mellifera]|Cog: YOR310c 1e-09 --|Kegg: ddi:DDB_0232265 1e-11 lig1; DNA ligase I [EC:6.5.1.1]; K10747 DNA ligase 1
MergeConsencus2293	3.85661	7.94181	5.69292	3.72615	1.81389	1.27991	0.031675	3.24478	Swissprot: Q24114 3e-32 DALY_DROME Division abnormally delayed protein OS=Drosophila melanogaster GN=dally PE=2 SV=1|Nr: ref|XP_968448.2| 2e-47 PREDICTED: similar to dally [Tribolium castaneum]|IPR: IPR001863; Glypican|GO: GO:0005578; proteinaceous extracellular matrix; Cellular Component|Kegg: gga:418795 7e-32 GPC5, LOC418795; glypican 5; K08111 glypican 5
MergeConsencus29021	1.58578	2.98323	2.81939	0.448243	1.42718	1.07482	0.024072	3.22376	Swissprot: P80229 2e-35 ILEU_PIG Leukocyte elastase inhibitor OS=Sus scrofa GN=SERPINB1 PE=1 SV=1|Nr: sp|P80229|ILEU_PIG 3e-34 RecName: Full=Leukocyte elastase inhibitor; Short=LEI; AltName: Full=Leukocyte neutral proteinase inhibitor; Short=LNPI; AltName: Full=Serpin B1|IPR: IPR000215; Protease inhibitor I4, serpin|GO: GO:0004867; serine-type endopeptidase inhibitor activity; Molecular Function|…
MergeConsencus16151	2.07475	5.14994	5.34602	1.62906	2.07473	1.56249	0.0427423	3.21669	Swissprot: Q7QHP6 3e-19 U466_ANOGA UPF0466 protein AGAP011291, mitochondrial OS=Anopheles gambiae GN=AGAP011291 PE=3 SV=2|Nr: ref|XP_968385.1| 1e-18 PREDICTED: similar to UPF0466 protein CG17680, mitochondrial [Tribolium castaneum]
MergeConsencus14981	31.2301	34.8787	49.7831	17.4075	16.6273	15.0454	0.00880536	3.21183	Swissprot: O75153 0.0 EIF3X_HUMAN Putative eukaryotic translation initiation factor 3 subunit OS=Homo sapiens GN=KIAA0664 PE=1 SV=2|Nr: gb|EEB16805.1| 0.0 eukaryotic translation initiation factor 3 subunit, putative [Pediculus humanus corporis]|Cog: MA0188 1e-18 --|Kegg: dpo:Dpse_GA21082 0.0 GA21082-PA; K03255 translation initiation factor eIF-3 subunit P135
MergeConsencus28238	1.56362	1.83847	2.56848	1.10495	1.31929	0.441585	0.0303504	3.20532	Swissprot: Q14624 3e-27 ITIH4_HUMAN Inter-alpha-trypsin inhibitor heavy chain H4 OS=Homo sapiens GN=ITIH4 PE=1 SV=3|Nr: ref|XP_973629.1| 2e-39 PREDICTED: similar to Inter-alpha-trypsin inhibitor heavy chain H4 precursor (ITI heavy chain H4) (Inter-alpha-inhibitor heavy chain 4) (Inter-alpha-trypsin inhibitor family heavy chain-related protein) (IHRP) (Plasma kallikrein sensitive glycoprotein 120)…
MergeConsencus26750	15.7895	15.5149	21.5339	5.89771	12.434	3.82211	0.0173563	3.19472	Swissprot: Q29550 2e-43 EST1_PIG Liver carboxylesterase OS=Sus scrofa PE=1 SV=1|Nr: gb|ABD62773.1| 2e-70 esterase [Chilo suppressalis]|IPR: IPR002018; Carboxylesterase, type B|Cog: BS_pnbA 2e-22 --|Kegg: mmu:72361 3e-41 2210023G05Rik; RIKEN cDNA 2210023G05 gene [EC:3.1.1.1]; K03927 carboxylesterase type B
MergeConsencus55889	1.79882	2.30729	2.78102	1.1556	1.28777	0.55419	0.0116164	3.18021	Nr: ref|XP_001948290.1| 1e-08 PREDICTED: similar to conserved hypothetical protein [Acyrthosiphon pisum]
MergeConsencus14975	1375.05	979.982	1483.13	427.889	569.464	607.705	0.00507869	3.17111	Swissprot: Q06547 7e-18 GABP1_HUMAN GA-binding protein subunit beta-1 OS=Homo sapiens GN=GABPB1 PE=1 SV=2|Nr: pdb|1N0R|A 4e-23 Chain A, 4ank: A Designed Ankyrin Repeat Protein With Four Identical Consensus Repeats|Cog: FN0178 4e-13 --|Kegg: gga:415453 2e-18 GABPB2; GA binding protein transcription factor, beta subunit 2; K09454 GA-binding protein transcription factor, beta
MergeConsencus70084	4.21318	4.30762	5.94727	1.55337	2.26685	2.06931	0.00447983	3.1475	Swissprot: Q9R1Q9 2e-12 VAS1_MOUSE Vacuolar ATP synthase subunit S1 OS=Mus musculus GN=Atp6ap1 PE=1 SV=1|Nr: ref|XP_974187.1| 2e-27 PREDICTED: similar to vacuolar ATP synthase subunit S1 [Tribolium castaneum]|IPR: IPR008388; ATPase, V1 complex, subunit S1|GO: GO:0015986; ATP synthesis coupled proton transport; Biological Process
MergeConsencus49012	4.1897	7.38923	4.04836	0.740176	3.53501	2.36644	0.0461141	3.14399	Nr: gb|AAZ15235.1| 6e-07 reverse transcriptase [Aedes aegypti]
MergeConsencus16281	68.1099	82.6809	80.873	17.0077	32.9698	40.9669	0.00252615	3.13279	Swissprot: P08836 7e-71 FPPS_CHICK Farnesyl pyrophosphate synthetase OS=Gallus gallus GN=FDPS PE=1 SV=2|Nr: emb|CAA08918.2| 1e-96 dimethylallyltransferase; farnesyl pyrophosphate synthase [Agrotis ipsilon]|IPR: IPR000092; Polyprenyl synthetase
MergeConsencus8443	2.13128	2.22748	1.00681	0.334688	0.932424	0.535021	0.0252651	3.10827	Swissprot: Q964R0 1e-113 CP6K1_BLAGE Cytochrome P450 6k1 OS=Blattella germanica GN=CYP6K1 PE=2 SV=1|Nr: dbj|BAD84176.1| 1e-138 cytochrome P450 [Hodotermopsis sjoestedti]|IPR: IPR001128; Cytochrome P450
MergeConsencus8157	68.8931	50.0313	93.5098	35.7972	27.5822	32.9611	0.0195923	3.10594	Swissprot: Q6NWZ9 8e-69 CDO1_DANRE Cysteine dioxygenase type 1 OS=Danio rerio GN=cdo1 PE=2 SV=1|Nr: ref|XP_001122114.1| 6e-75 PREDICTED: similar to cysteine dioxygenase, type I [Apis mellifera]|IPR: IPR010300; Cysteine dioxygenase type I
MergeConsencus45029	7.05029	5.56762	10.8186	5.20526	3.31464	2.49628	0.0389744	3.09039	Swissprot: P35502 2e-35 ESTF_MYZPE Esterase FE4 OS=Myzus persicae PE=1 SV=1|Nr: ref|XP_967137.1| 2e-71 PREDICTED: similar to juvenile hormone esterase [Tribolium castaneum]|IPR: IPR000886; Endoplasmic reticulum, targeting sequence
MergeConsencus47672	2.27136	3.49234	3.91676	1.72856	0.78623	1.57898	0.0157173	3.08696	Swissprot: Q8BGB8 8e-65 COQ4_MOUSE Ubiquinone biosynthesis protein COQ4 homolog OS=Mus musculus GN=Coq4 PE=2 SV=1|Nr: ref|XP_001943594.1| 6e-79 PREDICTED: similar to ubiquinone biosynthesis protein [Acyrthosiphon pisum]|IPR: IPR007715; Coenzyme Q biosynthesis Coq4|Cog: SPAC1687.12c 6e-48 --
MergeConsencus5958	28.6993	73.1646	55.5659	26.9146	21.7254	15.4526	0.0400768	3.07838	Swissprot: Q5R8E3 1e-93 GLCM_PONAB Glucosylceramidase OS=Pongo abelii GN=GBA PE=2 SV=1|Nr: ref|XP_975653.1| 1e-115 PREDICTED: similar to O-Glycosyl hydrolase family 30 protein [Tribolium castaneum]|IPR: IPR001139; Glycoside hydrolase, family 30
MergeConsencus16464	287.224	446.287	455.593	187.693	148.127	168.045	0.00747527	3.07348	Swissprot: Q9EQS0 1e-133 TALDO_RAT Transaldolase OS=Rattus norvegicus GN=Taldo1 PE=1 SV=2|Nr: ref|XP_001602166.1| 1e-138 PREDICTED: similar to transaldolase [Nasonia vitripennis]|IPR: IPR001585; Transaldolase|GO: GO:0005975; carbohydrate metabolic process; Biological Process|Cog: YLR354c 1e-109 --|Kegg: rno:83688 1e-133 Taldo1; transaldolase 1 [EC:2.2.1.2]; K00616 transaldolase
MergeConsencus14071	1.27832	2.00403	1.64693	1.20446	0.479365	0.320901	0.0234452	3.06399	Swissprot: Q8N4H0 3e-09 CI068_HUMAN Uncharacterized protein C9orf68 OS=Homo sapiens GN=C9orf68 PE=2 SV=2|Nr: ref|XP_001122192.1| 3e-37 PREDICTED: similar to CG14079-PA [Apis mellifera]
MergeConsencus5210	20.3993	25.0344	36.5641	14.956	10.327	12.2421	0.0205547	3.05786	Swissprot: Q86X95 2e-77 CIR_HUMAN CBF1-interacting corepressor OS=Homo sapiens GN=CIR PE=1 SV=1|Nr: ref|XP_001600439.1| 1e-111 PREDICTED: similar to IP14452p [Nasonia vitripennis]|Cog: SPAC140.02 9e-16 --|Kegg: dpo:Dpse_GA19900 1e-103 GA19900-PA; K06066 CBF1 interacting corepressor
MergeConsencus583	2.53645	2.49768	2.69597	1.74761	1.07005	0.75214	0.00491717	3.01837	Swissprot: P15620 2e-24 ZN271_MOUSE Zinc finger protein 271 OS=Mus musculus GN=Znf271 PE=2 SV=1|Nr: ref|XP_001921458.1| 3e-25 PREDICTED: similar to Zinc finger protein 251 [Danio rerio]|IPR: IPR007087; Zinc finger, C2H2-type
Contig1023	4.14016	3.24527	4.62278	1.30031	1.55254	2.07863	0.00353429	3.00964	Swissprot: Q9VG95 6e-08 GSTT5_DROME Glutathione S-transferase D5 OS=Drosophila melanogaster GN=GstD5 PE=3 SV=2|Nr: ref|XP_971136.1| 2e-09 PREDICTED: similar to Glutathione S transferase E8 CG17533-PA [Tribolium castaneum]|Kegg: dme:Dmel_CG12242 1e-07 GstD5; Glutathione S transferase D5 [EC:2.5.1.18]; K00799 glutathione S-transferase
MergeConsencus18133	97.8311	174.534	99.2026	59.3942	52.1062	31.9038	0.02309	3.00074	Swissprot: Q66S13 2e-06 NATT4_THANI Natterin-4 OS=Thalassophryne nattereri PE=2 SV=1|Nr: gb|EEB11272.1| 4e-35 conserved hypothetical protein [Pediculus humanus corporis]
MergeConsencus2297	1.42347	2.48662	1.03748	0.747251	0.274523	0.826982	0.0455563	2.9977	Swissprot: Q4L9P0 6e-15 SRAP_STAHJ Serine-rich adhesin for platelets OS=Staphylococcus haemolyticus (strain JCSC1435) GN=sraP PE=3 SV=1|Nr: ref|XP_001072007.1| 9e-15 PREDICTED: hypothetical protein [Rattus norvegicus] ref|XP_001073912.1| PREDICTED: hypothetical protein [Rattus norvegicus]|Kegg: sce:YIR019C 8e-08 MUC1, STA4, FLO11; GPI-anchored cell surface glycoprotein (flocculin) required for ps…
MergeConsencus27551	6.98543	11.0701	3.99117	2.36086	3.2459	1.88699	0.0405156	2.98555	Swissprot: Q4F7G0 9e-24 ERDL2_ARATH Sugar transporter ERD6-like 2 OS=Arabidopsis thaliana GN=SUGTL3 PE=2 SV=1|Nr: ref|XP_392024.2| 6e-97 PREDICTED: similar to CG30035-PB, isoform B [Apis mellifera]|Cog: BS_araE 1e-08 --|Kegg: gga:425954 8e-24 SLC2A6, LOC425954; solute carrier family 2 (facilitated glucose transporter), member 6; K08144 MFS transporter, SP family, solute carrier family 2 (facilita…
MergeConsencus12915	891.754	1668.96	1010.82	444.186	442.581	500.05	0.0198912	2.98066	Swissprot: Q6B855 0.0 TKT_BOVIN Transketolase OS=Bos taurus GN=TKT PE=2 SV=1|Nr: ref|XP_623357.1| 0.0 PREDICTED: similar to CG8036-PB, isoform B isoform 2 [Apis mellifera]|IPR: IPR001017; Dehydrogenase, E1 component
MergeConsencus24984	2.44934	4.63981	4.9438	1.53854	2.29623	1.22973	0.0259066	2.97957	Swissprot: Q91ZE0 3e-52 TMLH_MOUSE Trimethyllysine dioxygenase, mitochondrial OS=Mus musculus GN=Tmlhe PE=2 SV=2|Nr: gb|EEB20347.1| 8e-59 trimethyllysine dioxygenase, putative [Pediculus humanus corporis]|Kegg: mmu:192289 7e-52 Tmlhe; trimethyllysine hydroxylase, epsilon [EC:1.14.11.8]; K00474 trimethyllysine dioxygenase
MergeConsencus14927	1.86698	1.97564	2.59776	1.31933	0.210033	1.26542	0.0232761	2.97573	Swissprot: Q5R4S3 2e-09 RT32_PONAB 28S ribosomal protein S32, mitochondrial OS=Pongo abelii GN=MRPS32 PE=2 SV=1|Nr: ref|XP_001985318.1| 3e-29 GH16997 [Drosophila grimshawi] gb|EDV97666.1| GH16997 [Drosophila grimshawi]
Contig5252	19.8825	24.015	22.4952	14.0502	9.76039	5.51297	0.00539932	2.97018	Swissprot: O18598 4e-64 GST1_BLAGE Glutathione S-transferase OS=Blattella germanica PE=1 SV=3|Nr: ref|XP_001599411.1| 3e-64 PREDICTED: similar to Glutathione S-transferase (GST class-sigma) (Major allergen Bla g 5) [Nasonia vitripennis]|Nt: dbj|AP008215.1| 1e-13 Oryza sativa (japonica cultivar-group) genomic DNA, chromosome 9|Cog: CAC1629 1e-07 --|Kegg: dme:Dmel_CG8938 9e-50 GstS1; Glutathione S …
MergeConsencus54149	1.87629	2.83642	3.52239	1.51532	0.603086	1.51396	0.0267336	2.96895	Swissprot: Q86AH4 3e-06 Y8592_DICDI Putative uncharacterized protein DDB_0168592 OS=Dictyostelium discoideum GN=DDB_0168592 PE=4 SV=1|Nr: ref|XP_001750425.1| 3e-10 hypothetical protein [Monosiga brevicollis MX1] gb|EDQ84775.1| predicted protein [Monosiga brevicollis MX1]|Kegg: ddi:DDB_0191270 8e-06 trfA; hypothetical protein; K06665 glucose repression mediator protein
MergeConsencus2529	1.91864	4.92195	3.37075	0.986059	1.766	1.18221	0.04015	2.9487	Swissprot: Q9W6S8 5e-23 SMN1_DANRE Survival motor neuron protein 1 OS=Danio rerio GN=smn1 PE=1 SV=1|Nr: ref|XP_001599489.1| 2e-30 PREDICTED: similar to survival of motor neuron 1, telomeric [Nasonia vitripennis]|IPR: IPR002999; Tudor
MergeConsencus45726	3.28709	2.81083	3.69594	1.26702	2.01705	1.0127	0.00488581	2.93188	IPR: IPR008922; Di-copper centre-containing
MergeConsencus29752	33.619	46.282	60.8559	12.4159	26.9877	23.8552	0.0229443	2.92855	Swissprot: P04075 7e-62 ALDOA_HUMAN Fructose-bisphosphate aldolase A OS=Homo sapiens GN=ALDOA PE=1 SV=2|Nr: ref|XP_312372.4| 2e-64 AGAP002564-PA [Anopheles gambiae str. PEST] gb|EAA44916.4| AGAP002564-PA [Anopheles gambiae str. PEST]|IPR: IPR000741; Fructose-bisphosphate aldolase, class-I|GO: GO:0004332; fructose-bisphosphate aldolase activity; Molecular Function
MergeConsencus43746	80.6708	106.733	72.5014	36.8353	32.5117	34.6492	0.00374946	2.91949	Swissprot: P28175 4e-20 LFC_TACTR Limulus clotting factor C OS=Tachypleus tridentatus PE=1 SV=1|Nr: dbj|BAG14264.1| 2e-36 modular serine protease zymogen [Tenebrio molitor]|IPR: IPR001254; Peptidase S1 and S6, chymotrypsin/Hap
MergeConsencus1479	8.99679	11.3425	17.3262	6.90894	5.9967	5.4047	0.031247	2.91238	Swissprot: Q8CGY8 0.0 OGT1_MOUSE UDP-N-acetylglucosamine--peptide N-acetylglucosaminyltransferase 110 kDa subunit OS=Mus musculus GN=Ogt PE=1 SV=2|Nr: ref|XP_623820.2| 0.0 PREDICTED: similar to O-glycosyltransferase CG10392-PB, isoform B [Apis mellifera]|IPR: IPR001440; Tetratricopeptide TPR-1
MergeConsencus18582	1.93529	2.10044	1.95631	0.8416	1.00485	0.756761	0.00011297	2.90837	Swissprot: Q5R7P2 3e-74 TSN_PONAB Translin OS=Pongo abelii GN=TSN PE=2 SV=1|Nr: ref|XP_397233.2| 2e-74 PREDICTED: similar to Translin [Apis mellifera]|IPR: IPR002848; Translin|GO: GO:0043565; sequence-specific DNA binding; Molecular Function
MergeConsencus11075	2.21335	2.9147	3.55876	1.25127	1.39439	1.30016	0.00777527	2.90448	Swissprot: Q9TV68 8e-15 DHDH_CANFA Trans-1,2-dihydrobenzene-1,2-diol dehydrogenase OS=Canis familiaris GN=DHDH PE=1 SV=1|Nr: ref|XP_002232873.1| 3e-20 hypothetical protein BRAFLDRAFT_95495 [Branchiostoma floridae] gb|EEA47595.1| hypothetical protein BRAFLDRAFT_95495 [Branchiostoma floridae]|Kegg: cfa:403786 2e-14 DHDH; dihydrodiol dehydrogenase (dimeric) [EC:1.3.1.20]; K00212 trans-1,2-dihydroben…
MergeConsencus1823	17.7201	10.0519	12.4963	3.95437	5.59576	7.37487	0.017207	2.90351	Swissprot: Q14681 3e-19 KCTD2_HUMAN BTB/POZ domain-containing protein KCTD2 OS=Homo sapiens GN=KCTD2 PE=2 SV=2|Nr: gb|EEB16599.1| 4e-22 BTB/POZ domain-containing protein KCTD5, putative [Pediculus humanus corporis]
MergeConsencus16399	166.195	184.973	328.741	103.783	130.206	102.042	0.0464119	2.89564	Nr: gb|EEC18641.1| 2e-09 hypothetical protein IscW_ISCW014754 [Ixodes scapularis]
MergeConsencus2833	4.44554	4.64619	6.49108	3.49055	1.11137	2.78994	0.0233539	2.88711	Swissprot: P05090 2e-24 APOD_HUMAN Apolipoprotein D OS=Homo sapiens GN=APOD PE=1 SV=1|Nr: ref|XP_393673.2| 2e-38 PREDICTED: similar to doughnut on 2 CG17559-PA [Apis mellifera]|IPR: IPR002969; Apolipoprotein D
MergeConsencus4649	1.88536	2.63901	2.70662	1.26887	0.909003	0.91277	0.00440209	2.88105	Swissprot: Q5R5C9 2e-17 SCPDH_PONAB Probable saccharopine dehydrogenase OS=Pongo abelii GN=SCCPDH PE=2 SV=1|Nr: ref|XP_002073906.1| 4e-30 GK14366 [Drosophila willistoni] gb|EDW84892.1| GK14366 [Drosophila willistoni]
MergeConsencus17531	15.8756	26.4247	28.0846	11.7399	9.17007	11.4882	0.0158564	2.87981	Swissprot: Q9VJE5 1e-169 CL190_DROME Restin homolog OS=Drosophila melanogaster GN=CLIP-190 PE=1 SV=1|Nr: gb|EEB14305.1| 0.0 retiin, putative [Pediculus humanus corporis]|IPR: IPR000938; Cytoskeleton-associated protein, CAP-Gly
MergeConsencus9316	11.6221	17.0813	22.2105	10.7985	6.65841	7.90164	0.0304674	2.87356	Swissprot: P13129 2e-86 LUCI_LUCCR Luciferin 4-monooxygenase OS=Luciola cruciata PE=1 SV=1|Nr: ref|XP_001604903.1| 1e-103 PREDICTED: similar to CG6178-PA [Nasonia vitripennis]|IPR: IPR000873; AMP-dependent synthetase and ligase|GO: GO:0003824; catalytic activity; Molecular Function
MergeConsencus15564	19.0244	29.0479	13.0721	9.89615	9.66069	4.17877	0.033992	2.86313	Swissprot: Q9VNE7 4e-19 C42ES_DROME CDC42 small effector protein homolog OS=Drosophila melanogaster GN=Spec2 PE=1 SV=2|Nr: gb|EEB16994.1| 2e-28 conserved hypothetical protein [Pediculus humanus corporis]
MergeConsencus17605	1.05554	2.30487	1.2822	0.532796	0.678555	0.596196	0.0354308	2.85986	Swissprot: O94760 1e-48 DDAH1_HUMAN N(G),N(G)-dimethylarginine dimethylaminohydrolase 1 OS=Homo sapiens GN=DDAH1 PE=1 SV=3|Nr: ref|XP_968480.1| 2e-87 PREDICTED: similar to ng,ng-dimethylarginine dimethylaminohydrolase [Tribolium castaneum]|Cog: SMb21304 9e-11 --|Kegg: dme:Dmel_CG1764 3e-63 CG1764; CG1764 [EC:3.5.3.18]; K01482
MergeConsencus18647	9.29059	22.3594	19.1887	10.4635	7.34891	5.57552	0.0470873	2.85669	Swissprot: Q9QY66 2e-22 ZNHI2_MOUSE Zinc finger HIT domain-containing protein 2 OS=Mus musculus GN=Znhit2 PE=2 SV=2|Nr: ref|XP_001842860.1| 7e-52 HIT zinc finger family protein [Culex quinquefasciatus] gb|EDS28703.1| HIT zinc finger family protein [Culex quinquefasciatus]|IPR: IPR007529; Zinc finger, HIT-type
MergeConsencus7740	460.234	618.417	750.708	320.577	445.001	112.508	0.0344073	2.84623	Swissprot: Q8U259 1e-35 TDH_PYRFU Probable L-threonine 3-dehydrogenase OS=Pyrococcus furiosus GN=tdh PE=3 SV=1|Nr: ref|XP_968461.1| 1e-120 PREDICTED: similar to putative zinc-containing alcohol dehydrogenase [Tribolium castaneum]|IPR: IPR002328; Alcohol dehydrogenase, zinc-containing, conserved site
MergeConsencus18029	1.18847	2.19589	2.0999	0.719872	0.764009	0.958969	0.0184901	2.83631	Nr: ref|XP_001744545.1| 4e-06 hypothetical protein [Monosiga brevicollis MX1] gb|EDQ90494.1| predicted protein [Monosiga brevicollis MX1]
MergeConsencus22968	196.167	245.72	192.78	83.0956	76.8009	110.17	0.00183201	2.8272	Nr: ref|XP_969758.1| 1e-14 PREDICTED: similar to epidermal growth factor-like protein [Tribolium castaneum]
MergeConsencus568	4.26572	5.51213	4.04836	2.26828	2.28065	1.47903	0.00394329	2.82167	IPR: IPR009011; Mannose-6-phosphate receptor, binding|GO: GO:0005515; protein binding; Molecular Function
MergeConsencus4496	1.39323	1.80194	1.88472	1.27991	0.862051	0.393465	0.023224	2.81185	Swissprot: Q5PQ27 2e-87 S2542_XENLA Solute carrier family 25 member 42 OS=Xenopus laevis GN=slc25a42 PE=2 SV=1|Nr: ref|XP_001649538.1| 1e-103 mitochondrial solute carrier protein, putative [Aedes aegypti] gb|EAT32991.1| mitochondrial solute carrier protein, putative [Aedes aegypti]|IPR: IPR001993; Mitochondrial substrate carrier
MergeConsencus19972	8.70775	12.4968	10.5917	5.24852	5.33022	3.61643	0.00439505	2.80977	Nr: ref|XP_793714.2| 2e-07 PREDICTED: similar to endonuclease/reverse transcriptase [Strongylocentrotus purpuratus] ref|XP_001182820.1| PREDICTED: similar to endonuclease/reverse transcriptase [Strongylocentrotus purpuratus]
MergeConsencus7951	5.88089	6.64867	3.49692	3.83613	1.52675	1.27756	0.0333147	2.80798	Swissprot: P82147 6e-37 L2EFL_DROME Protein lethal(2)essential for life OS=Drosophila melanogaster GN=l(2)efl PE=1 SV=1|Nr: gb|ABC84492.1| 1e-98 heat shock protein 20.5 [Locusta migratoria]|IPR: IPR001436; Alpha crystallin/Heat shock protein
MergeConsencus18153	2.04862	2.6496	1.90033	1.15815	1.15234	0.462844	0.00861625	2.7991	Nr: gb|EEB16555.1| 7e-11 hypothetical protein Phum_PHUM426600 [Pediculus humanus corporis]|IPR: IPR009057; Homeodomain-like
MergeConsencus9913	80.2855	54.3374	88.2592	22.2841	21.6116	59.9852	0.0358474	2.78755	Swissprot: P04323 2e-11 POL3_DROME Retrovirus-related Pol polyprotein from transposon 17.6 OS=Drosophila melanogaster GN=pol PE=4 SV=1|Nr: emb|CAA04050.1| 5e-11 RNase H; integrase; protease; reverse transcriptase [Drosophila melanogaster]|Cog: SPAC9.04 3e-06 --|Kegg: cgr:CAGL0G07172g 1e-07 unnamed protein product; K07497 putative transposase
MergeConsencus6121	7.11598	7.01003	3.81582	1.6309	3.10118	2.31742	0.0177375	2.78753	Swissprot: Q58D55 1e-157 BGAL_BOVIN Beta-galactosidase OS=Bos taurus GN=GLB1 PE=2 SV=1|Nr: ref|XP_001121565.1| 1e-175 PREDICTED: similar to Ect3 CG3132-PA [Apis mellifera]|IPR: IPR001944; Glycoside hydrolase, family 35
MergeConsencus25959	4.4099	5.8673	2.69124	1.31213	0.783327	2.753	0.0340211	2.78454	Swissprot: Q9VV43 2e-59 Y4893_DROME TPPP family protein CG4893 OS=Drosophila melanogaster GN=CG4893 PE=2 SV=1|Nr: ref|XP_001848073.1| 2e-62 conserved hypothetical protein [Culex quinquefasciatus] gb|EDS27566.1| conserved hypothetical protein [Culex quinquefasciatus]|IPR: IPR008907; P25-alpha|Cog: DR2133 1e-06 --|Kegg: cfa:485116 4e-06 MAML2, LOC485116; mastermind-like 2 (Drosophila); K06061 maste…
Contig5478	138.58	179.403	271.915	106.801	119.234	74.4548	0.040712	2.78118	Swissprot: P20432 1e-72 GSTT1_DROME Glutathione S-transferase 1-1 OS=Drosophila melanogaster GN=GstD1 PE=1 SV=1|Nr: emb|CAO85744.1| 2e-84 glutathione S-transferase [Blattella germanica]|Cog: PA1655 7e-16 --|Kegg: dpo:Dpse_GA10031 2e-72 GA10031-PA [EC:2.5.1.18]; K00799 glutathione S-transferase
MergeConsencus8071	49.8572	65.2145	25.3999	22.291	16.5604	14.9463	0.0353251	2.77695	Swissprot: Q05826 1e-20 CEBPB_CHICK CCAAT/enhancer-binding protein beta OS=Gallus gallus GN=CEBPB PE=2 SV=1|Nr: gb|EEB16704.1| 3e-41 ccaat/enhancer binding protein beta, putative [Pediculus humanus corporis]|Kegg: xtr:619595 4e-22 cebpb; CCAAT/enhancer binding protein (C/EBP), beta; K10048 CCAAT/enhancer binding protein (C/EBP), beta
Contig4412	3.5833	2.6811	3.02174	1.38119	2.19881	0.367987	0.0197842	2.7693	Swissprot: P0C0T0 8e-08 LITAF_RAT Lipopolysaccharide-induced tumor necrosis factor-alpha factor homolog OS=Rattus norvegicus GN=Litaf PE=2 SV=1|Nr: ref|XP_001652693.1| 1e-23 hypothetical protein AaeL_AAEL007344 [Aedes aegypti] gb|EAT40986.1| conserved hypothetical protein [Aedes aegypti]
MergeConsencus48555	1.47827	3.18655	1.90453	1.04464	1.10869	0.556642	0.038288	2.76471	Nr: ref|XP_001950551.1| 4e-12 PREDICTED: similar to F14D2.9 [Acyrthosiphon pisum]
MergeConsencus1476	3.99579	5.48943	2.406	1.30781	1.60881	1.75802	0.0278253	2.75802	Nr: gb|EEB20356.1| 7e-09 hypothetical protein Phum_PHUM613190 [Pediculus humanus corporis]
MergeConsencus19201	70.5747	43.2481	55.3641	16.9059	21.6992	37.8353	0.0189669	2.74867	Swissprot: Q03567 1e-17 YLD2_CAEEL Uncharacterized transporter C38C10.2 OS=Caenorhabditis elegans GN=C38C10.2 PE=1 SV=2|Nr: ref|XP_001665353.1| 1e-16 hypothetical protein CBG10101 [Caenorhabditis briggsae AF16] emb|CAP29610.1| Hypothetical protein CBG10101 [Caenorhabditis briggsae]|Cog: CC0042 5e-06 --|Kegg: cel:C38C10.2 3e-17 C38C10.2; K08193 MFS transporter, ACS family, solute carrier family 17…
MergeConsencus13827	4.16505	5.32097	3.83879	1.13203	1.71206	2.66921	0.00741785	2.74426	Swissprot: Q96RW7 1e-131 HMCN1_HUMAN Hemicentin-1 OS=Homo sapiens GN=HMCN1 PE=1 SV=2|Nr: gb|EEB10978.1| 1e-162 hemicentin, putative [Pediculus humanus corporis]|IPR: IPR000152; Aspartic acid and asparagine hydroxylation site
MergeConsencus14852	110.312	120.61	168.787	62.3627	69.3422	69.6295	0.0110055	2.7436	Swissprot: P10620 2e-23 MGST1_HUMAN Microsomal glutathione S-transferase 1 OS=Homo sapiens GN=MGST1 PE=2 SV=1|Nr: gb|EEB15330.1| 5e-40 Microsomal glutathione S-transferase, putative [Pediculus humanus corporis]|IPR: IPR001129; Membrane-associated proteins in eicosanoid and glutathione metabolism (MAPEG)|Kegg: dme:Dmel_CG1742 2e-38 Mgstl; Microsomal glutathione S-transferase-like [EC:2.5.1.18]; K0…
MergeConsencus47179	1.8545	1.78403	2.8671	0.953095	1.04314	1.23791	0.0193785	2.74044	Nr: ref|XP_796756.2| 9e-09 PREDICTED: similar to endonuclease-reverse transcriptase, partial [Strongylocentrotus purpuratus] ref|XP_001183353.1| PREDICTED: similar to endonuclease-reverse transcriptase, partial [Strongylocentrotus purpuratus]|IPR: IPR016090; Phospholipase A2
MergeConsencus5421	1.60137	1.71169	1.35041	1.02876	0.327549	0.657813	0.00910286	2.73802	Swissprot: Q9D9B4 6e-17 CJ011_MOUSE Leucine-rich repeat-containing protein C10orf11 homolog OS=Mus musculus PE=2 SV=1|Nr: ref|XP_623965.1| 2e-54 PREDICTED: similar to Misexpression suppressor of KSR 4 CG31447-PA [Apis mellifera]|IPR: IPR001611; Leucine-rich repeat|GO: GO:0005515; protein binding; Molecular Function|Cog: CAC3279_2 3e-06 --
MergeConsencus33735	3.26887	3.04826	3.39821	1.43379	1.52169	1.528	4.084e-05	2.72461	Swissprot: P09848 1e-115 LPH_HUMAN Lactase-phlorizin hydrolase OS=Homo sapiens GN=LCT PE=1 SV=1|Nr: dbj|BAB91145.1| 1e-154 beta-glucosidase [Neotermes koshunensis]|IPR: IPR001360; Glycoside hydrolase, family 1
MergeConsencus17845	12.9681	19.5244	22.7996	10.1699	9.34048	7.86065	0.0174977	2.71982	Swissprot: Q29RK2 1e-110 PYC_BOVIN Pyruvate carboxylase, mitochondrial OS=Bos taurus GN=PC PE=2 SV=2|Nr: ref|XP_001600219.1| 1e-141 PREDICTED: similar to pyruvate carboxylase [Nasonia vitripennis]|IPR: IPR000089; Biotin/lipoyl attachment
MergeConsencus55806	1.13235	1.33139	1.75064	1.00024	0.636939	0.799473	0.0239815	2.70487	Swissprot: Q5RDW1 3e-77 GTPB5_PONAB GTP-binding protein 5 OS=Pongo abelii GN=GTPBP5 PE=2 SV=1|Nr: ref|XP_966382.1| 1e-124 PREDICTED: similar to Putative GTP-binding protein 5 [Tribolium castaneum]|IPR: IPR002917; GTP-binding protein, HSR1-related
MergeConsencus13175	1.89631	2.36899	3.81736	1.61923	1.19999	1.4281	0.0481688	2.69196	Swissprot: O43426 0.0 SYNJ1_HUMAN Synaptojanin-1 OS=Homo sapiens GN=SYNJ1 PE=1 SV=1|Nr: ref|NP_569729.1| 0.0 synaptojanin CG6562-PB, isoform B [Drosophila melanogaster] ref|NP_726155.1| synaptojanin CG6562-PA, isoform A [Drosophila melanogaster] gb|AAF46796.1| CG6562-PA, isoform A [Drosophila melanogaster] gb|AAG22194.1| CG6562-PB, isoform B [Drosophila melanogaster] gb|AAV37020.1| GH06496p [Dros…
MergeConsencus55561	112.959	127.032	57.143	39.749	34.7517	43.4025	0.0249005	2.68646	Swissprot: Q6S6W0 2e-17 VGLX_EHV1V Glycoprotein X OS=Equine herpesvirus 1 (strain V592) GN=71 PE=4 SV=1|Nr: ref|NP_001091784.1| 1e-19 multi-binding protein [Bombyx mori] dbj|BAF03496.1| multi-binding protein [Bombyx mori]|IPR: IPR001304; C-type lectin
MergeConsencus7472	7.33825	10.3058	8.35125	5.76185	4.12771	2.99348	0.0105227	2.68483	Swissprot: O18598 4e-56 GST1_BLAGE Glutathione S-transferase OS=Blattella germanica PE=1 SV=3|Nr: ref|XP_001600977.1| 4e-57 PREDICTED: similar to Glutathione S-transferase (GST class-sigma) (Major allergen Bla g 5) [Nasonia vitripennis]|IPR: IPR004045; Glutathione S-transferase, N-terminal
MergeConsencus5851	3.21397	3.96786	5.58998	1.81696	3.07332	1.27073	0.0333396	2.68293	Swissprot: Q1LZ78 5e-40 CA057_BOVIN Probable UPF0334 kinase-like protein C1orf57 homolog OS=Bos taurus PE=2 SV=1|Nr: ref|NP_001069284.1| 7e-39 hypothetical protein LOC521103 [Bos taurus] sp|Q1LZ78|CA057_BOVIN RecName: Full=Probable UPF0334 kinase-like protein C1orf57 homolog gb|AAI16159.1| Chromosome 1 open reading frame 57 ortholog [Bos taurus]|IPR: IPR004948; Protein of unknown function DUF265|…
MergeConsencus35401	1.18552	2.78781	2.74926	0.718081	1.14316	1.1479	0.0431387	2.67901	Swissprot: Q964T2 3e-09 CP9E2_BLAGE Cytochrome P450 9e2 OS=Blattella germanica GN=CYP9E2 PE=2 SV=1|Nr: gb|AAR97606.1| 3e-08 cytochrome P450 9E1 [Diploptera punctata]|IPR: IPR001128; Cytochrome P450|GO: GO:0004497; monooxygenase activity; Molecular Function
MergeConsencus15653	226.499	385.321	346.059	212.272	149.511	105.597	0.0226724	2.67728	Swissprot: P14928 3e-07 LEA1_HORVU ABA-inducible protein PHV A1 OS=Hordeum vulgare GN=HVA1 PE=2 SV=1|Nr: ref|XP_001651109.1| 1e-12 hypothetical protein AaeL_AAEL005593 [Aedes aegypti] gb|EAT42938.1| conserved hypothetical protein [Aedes aegypti]
MergeConsencus15192	1031.47	1136.34	460.215	281.119	441.395	310.59	0.0347057	2.6746	Swissprot: Q9I7S8 1e-168 PUR6_DROME Multifunctional protein ADE2 OS=Drosophila melanogaster GN=ade5 PE=1 SV=2|Nr: gb|EEB16639.1| 0.0 purine biosynthesis protein 6, pur6, putative [Pediculus humanus corporis]|IPR: IPR000031; 1-(5-Phosphoribosyl)-5-amino-4-imidazole-carboxylate (AIR) carboxylase
Contig2698	13.6996	15.7415	12.9967	6.16061	6.65509	7.03439	0.000471582	2.66033	Swissprot: Q9JME7 3e-48 TPC2L_MOUSE Trafficking protein particle complex subunit 2-like protein OS=Mus musculus GN=Trappc2l PE=2 SV=1|Nr: ref|XP_001944538.1| 2e-49 PREDICTED: similar to CG9067 CG9067-PA [Acyrthosiphon pisum]|Cog: SPBC11G11.04 8e-08 --
MergeConsencus17684	7.35292	12.728	12.6309	4.33003	4.59552	6.22965	0.0176695	2.6483	Swissprot: P41496 2e-37 FABPM_SCHGR Fatty acid-binding protein, muscle OS=Schistocerca gregaria PE=1 SV=2|Nr: gb|ABQ18251.1| 2e-46 MPA13-like protein [Lygus lineolaris]|IPR: IPR000463; Cytosolic fatty-acid binding
MergeConsencus22092	3.38299	2.98323	4.24952	2.39063	1.90291	0.955395	0.0168268	2.64083	Nr: gb|ABV31711.1| 1e-08 transposase [Salmo salar]
MergeConsencus16664	158.722	189.717	116.23	55.1513	79.6115	66.472	0.00867649	2.62667	Swissprot: Q9I923 2e-60 RGN_CHICK Regucalcin OS=Gallus gallus GN=RGN PE=2 SV=1|Nr: ref|XP_967668.1| 7e-77 PREDICTED: similar to luciferin-regenerating enzyme [Tribolium castaneum]|IPR: IPR005511; Senescence marker protein-30 (SMP-30)
MergeConsencus14084	2.04703	4.27884	3.07684	1.1251	1.40731	1.41314	0.0246438	2.62561	Swissprot: Q5ZJH6 1e-116 ULK3_CHICK Serine/threonine-protein kinase ULK3 OS=Gallus gallus GN=ULK3 PE=2 SV=1|Nr: ref|XP_001606416.1| 1e-144 PREDICTED: similar to CG8866-PA [Nasonia vitripennis]|IPR: IPR000719; Protein kinase, core
MergeConsencus14247	1.59944	2.2567	1.85457	1.65772	0.539802	0.662492	0.0387613	2.62134	Nr: ref|XP_001949716.1| 2e-09 PREDICTED: similar to reverse transcriptase-like protein [Acyrthosiphon pisum]
MergeConsencus7681	32.4802	53.9094	27.6767	12.5972	17.93	18.0043	0.0286507	2.60798	Swissprot: Q24167 8e-11 SIMA_DROME Protein similar OS=Drosophila melanogaster GN=sima PE=2 SV=2|Nr: ref|XP_967427.2| 2e-51 PREDICTED: similar to hypoxia-inducible factor 1 alpha [Tribolium castaneum]|Kegg: dme:Dmel_CG7951 2e-10 sima; similar; K08268 hypoxia-inducible factor 1 alpha
MergeConsencus20512	1.45545	2.28171	1.87513	1.37135	0.818679	0.548047	0.0239639	2.60632	Swissprot: Q5ZJH6 4e-88 ULK3_CHICK Serine/threonine-protein kinase ULK3 OS=Gallus gallus GN=ULK3 PE=2 SV=1|Nr: ref|XP_001606416.1| 1e-111 PREDICTED: similar to CG8866-PA [Nasonia vitripennis]|IPR: IPR000719; Protein kinase, core
MergeConsencus1894	40.5849	42.532	38.7042	19.016	23.8213	14.95	0.000786274	2.59014	Swissprot: Q60534 1e-13 CF105_MESAU Uncharacterized protein C6orf105 homolog OS=Mesocricetus auratus PE=2 SV=1|Nr: ref|XP_975965.1| 6e-17 PREDICTED: similar to CG3625 CG3625-PB isoform 2 [Tribolium castaneum]|IPR: IPR006838; FAR-17a/AIG1-like protein|GO: GO:0016021; integral to membrane; Cellular Component
MergeConsencus17183	248.47	247.106	148.854	101.797	95.0051	87.5463	0.0112647	2.58813	Swissprot: Q96GK7 2e-82 FAH2A_HUMAN Fumarylacetoacetate hydrolase domain-containing protein 2A OS=Homo sapiens GN=FAHD2A PE=1 SV=1|Nr: ref|XP_974757.1| 1e-107 PREDICTED: similar to fumarylacetoacetate hydrolase [Tribolium castaneum]|IPR: IPR002529; Fumarylacetoacetase, C-terminal-like
MergeConsencus10925	8.62085	12.4753	14.3533	3.74894	8.20628	5.24382	0.0232425	2.57673	Nr: ref|XP_001185162.1| 1e-17 PREDICTED: hypothetical protein [Strongylocentrotus purpuratus] ref|XP_001186524.1| PREDICTED: hypothetical protein [Strongylocentrotus purpuratus]|IPR: IPR010285; Protein of unknown function DUF889, eukaryote
MergeConsencus20581	7.39319	3.97981	4.61332	3.14728	2.6054	1.71059	0.0327943	2.57427	Swissprot: P18173 7e-48 DHGL_DROME Glucose dehydrogenase [acceptor] OS=Drosophila melanogaster GN=Gld PE=2 SV=3|Nr: ref|XP_394220.1| 7e-70 PREDICTED: similar to CG9518-PA [Apis mellifera]|Cog: DR0965 1e-39 --|Kegg: dpo:Dpse_GA21849 2e-66 GA21849-PA [EC:1.1.99.1]; K00108 choline dehydrogenase
MergeConsencus2857	7.45595	12.6185	9.34391	4.78986	3.93974	4.72176	0.0127592	2.56174	Nr: ref|XP_001568167.1| 1e-07 proteophosphoglycan ppg4 [Leishmania braziliensis MHOM/BR/75/M2904] emb|CAM43271.1| proteophosphoglycan ppg4 [Leishmania braziliensis]
Contig4766	273.892	275.107	287.595	148.508	158.529	113.179	0.000327032	2.5591	Swissprot: O46163 5e-22 SGP3_SCHGR Serine protease inhibitor 3 OS=Schistocerca gregaria PE=1 SV=1|Nr: sp|O46163.1|SGP3_SCHGR 8e-21 RecName: Full=Serine protease inhibitor 3; AltName: Full=Serine protease inhibitor III; AltName: Full=Protease inhibitor SGPI-3; Flags: Precursor emb|CAA70819.1| serine protease inhibitor II [Schistocerca gregaria]|Nt: emb|Y09606.1|SGSERPRII 1e-13 S.gregaria mRNA for …
MergeConsencus18788	2.24448	1.88501	3.22216	1.35951	1.44286	1.08663	0.0246645	2.55351	Swissprot: Q6GQN5 5e-08 LRC67_DANRE Leucine-rich repeat-containing protein 67 OS=Danio rerio GN=lrrc67 PE=2 SV=1|Nr: ref|NP_001002202.1| 6e-07 hypothetical protein LOC431749 [Danio rerio] sp|Q6GQN5|LRC67_DANRE RecName: Full=Leucine-rich repeat-containing protein 67 gb|AAH72707.1| Zgc:91834 [Danio rerio]
MergeConsencus16929	40.2651	49.6336	38.4047	24.5529	22.4662	15.0395	0.00405667	2.53815	Swissprot: Q9CPV4 1e-92 GLOD4_MOUSE Glyoxalase domain-containing protein 4 OS=Mus musculus GN=Glod4 PE=2 SV=1|Nr: ref|NP_001037668.1| 1e-121 cytosolic juvenile hormone binding protein 36 kDa subunit [Bombyx mori] gb|AAF19266.1|AF098303_1 cytosolic juvenile hormone binding protein 36 kDa subunit [Bombyx mori]|IPR: IPR004360; Glyoxalase/bleomycin resistance protein/dioxygenase|Cog: STM1435 3e-12 --…
MergeConsencus12433	1.95011	3.74103	3.8083	2.03084	1.15465	1.39132	0.034207	2.53159	Nr: ref|XP_001076544.1| 6e-06 PREDICTED: hypothetical protein [Rattus norvegicus]
Contig5342	63.9831	42.2825	34.4172	18.0418	26.095	22.6859	0.0272572	2.52316	Swissprot: P63324 1e-42 RS12_RAT 40S ribosomal protein S12 OS=Rattus norvegicus GN=Rps12 PE=1 SV=2|Nr: gb|AAM33784.1| 3e-58 ribosomal protein S12 [Periplaneta americana]|Nt: ref|XM_624642.2| 3e-33 PREDICTED: Apis mellifera similar to 40S ribosomal protein S12 (LOC552266), mRNA|Cog: SPCC962.04 2e-29 --|Kegg: nve:NEMVE_v1g171532 2e-45 NEMVEDRAFT_v1g171532; predicted protein; K02951 small subunit ri…
MergeConsencus17290	78.5569	146.841	126.592	67.7504	65.6687	43.2696	0.0272921	2.51523	Swissprot: Q9VSA3 1e-178 ACADM_DROME Probable medium-chain specific acyl-CoA dehydrogenase, mitochondrial OS=Drosophila melanogaster GN=CG12262 PE=1 SV=1|Nr: ref|XP_970506.1| 0.0 PREDICTED: similar to CG12262 CG12262-PA [Tribolium castaneum]|IPR: IPR006089; Acyl-CoA dehydrogenase, conserved site
MergeConsencus5935	29.3313	45.5307	29.6792	20.378	9.54696	19.4523	0.0223435	2.50863	Swissprot: P35502 3e-78 ESTF_MYZPE Esterase FE4 OS=Myzus persicae PE=1 SV=1|Nr: gb|ABY53601.1| 0.0 carboxylesterase-like protein [Locusta migratoria manilensis]|IPR: IPR002018; Carboxylesterase, type B|Cog: BS_pnbA 2e-38 --|Kegg: dpo:Dpse_GA17724 3e-72 GA17724-PA [EC:3.1.1.1]; K03927 carboxylesterase type B
MergeConsencus33417	17.5415	25.1292	26.652	13.3933	14.0633	9.11068	0.013706	2.50635	Swissprot: Q6AYS4 2e-50 FUCO2_RAT Plasma alpha-L-fucosidase OS=Rattus norvegicus GN=Fuca2 PE=2 SV=1|Nr: ref|XP_002201940.1| 1e-55 hypothetical protein BRAFLDRAFT_56888 [Branchiostoma floridae] gb|EEA78653.1| hypothetical protein BRAFLDRAFT_56888 [Branchiostoma floridae]|IPR: IPR000933; Glycoside hydrolase, family 29 (alpha-L-fucosidase)
MergeConsencus27054	2.8332	4.23972	2.19009	1.09206	2.31804	0.581912	0.0457794	2.50158	Swissprot: Q64442 2e-20 DHSO_MOUSE Sorbitol dehydrogenase OS=Mus musculus GN=Sord PE=2 SV=3|Nr: ref|XP_972368.1| 2e-26 PREDICTED: similar to AGAP003584-PA [Tribolium castaneum]|Cog: SPBC1773.05c 1e-13 --|Kegg: dme:Dmel_CG1982 4e-23 Sodh-1; Sorbitol dehydrogenase 1 [EC:1.1.1.14]; K00008 L-iditol 2-dehydrogenase
MergeConsencus18501	43.1847	52.8443	62.19	36.8465	24.471	24.5724	0.0122531	2.49407	Nr: gb|EEB14172.1| 2e-06 F-box/LRR-repeat protein, putative [Pediculus humanus corporis]
MergeConsencus17501	1.43269	1.36868	2.14575	0.885875	1.30955	0.505761	0.0463832	2.49196	Swissprot: O76064 2e-31 RNF8_HUMAN E3 ubiquitin-protein ligase RNF8 OS=Homo sapiens GN=RNF8 PE=1 SV=1|Nr: ref|NP_991116.1| 1e-36 hypothetical protein LOC404050 isoform 1 [Danio rerio] gb|AAH65643.1| Zgc:55936 [Danio rerio]|IPR: IPR000253; Forkhead-associated
MergeConsencus700	5.50305	6.34593	5.23559	2.99139	3.21448	2.51051	0.00104851	2.46967	Swissprot: P35282 9e-83 RAB21_MOUSE Ras-related protein Rab-21 OS=Mus musculus GN=Rab21 PE=1 SV=4|Nr: gb|ABR27886.1| 1e-91 Ras-related small GTPase [Triatoma infestans]|IPR: IPR001806; Ras GTPase
MergeConsencus15770	24.1685	31.76	19.0489	12.3907	14.1277	8.56531	0.0151028	2.45946	Swissprot: P82147 9e-25 L2EFL_DROME Protein lethal(2)essential for life OS=Drosophila melanogaster GN=l(2)efl PE=1 SV=1|Nr: gb|ABM55532.1| 6e-29 putative small heat shock protein [Maconellicoccus hirsutus]|IPR: IPR001436; Alpha crystallin/Heat shock protein
Contig333	8.83234	9.51946	12.5171	6.76161	3.72609	5.82016	0.014129	2.45644	Swissprot: O02751 3e-09 CFDP2_BOVIN Craniofacial development protein 2 OS=Bos taurus GN=CFDP2 PE=1 SV=2|Nr: ref|XP_001946398.1| 3e-26 PREDICTED: hypothetical protein, partial [Acyrthosiphon pisum]
MergeConsencus16570	27.8156	42.9799	17.6165	12.5122	15.7425	10.0008	0.0456401	2.45619	Swissprot: Q292F9 1e-168 GDAP2_DROPS Protein GDAP2 homolog OS=Drosophila pseudoobscura GN=GA15091 PE=3 SV=1|Nr: ref|XP_001815509.1| 0.0 PREDICTED: similar to AGAP005091-PB [Tribolium castaneum]|IPR: IPR001251; Cellular retinaldehyde-binding/triple function, C-terminal
MergeConsencus36074	4.20893	6.11847	7.39443	3.24468	2.49663	3.89013	0.0278539	2.45429	Swissprot: P95329 3e-60 MASY_MYXXD Malate synthase OS=Myxococcus xanthus (strain DK 1622) GN=mls PE=3 SV=2|Nr: ref|XP_002208761.1| 1e-108 hypothetical protein BRAFLDRAFT_207329 [Branchiostoma floridae] gb|EEA71914.1| hypothetical protein BRAFLDRAFT_207329 [Branchiostoma floridae]|IPR: IPR001465; Malate synthase
Contig5357	110.062	193.734	226.712	85.8122	112.957	89.916	0.0435335	2.44918	Swissprot: P99029 2e-48 PRDX5_MOUSE Peroxiredoxin-5, mitochondrial OS=Mus musculus GN=Prdx5 PE=1 SV=2|Nr: ref|XP_001238545.2| 5e-66 AGAP001325-PA [Anopheles gambiae str. PEST] gb|EAU75715.2| AGAP001325-PA [Anopheles gambiae str. PEST]|Cog: VC1350 6e-37 --|Kegg: mmu:54683 4e-48 Prdx5; peroxiredoxin 5 [EC:1.11.1.15]; K03386 peroxiredoxin (alkyl hydroperoxide reductase subunit C)
MergeConsencus18156	51.2692	85.9982	44.5117	23.3422	31.2776	27.1572	0.0315348	2.44619	Swissprot: Q68EK7 2e-88 RAB4B_DANRE Ras-related protein Rab-4B OS=Danio rerio GN=rab4b PE=2 SV=1|Nr: gb|ACH92482.1| 1e-93 FI09101p [Drosophila melanogaster]|IPR: IPR001806; Ras GTPase
MergeConsencus4750	16.7516	13.7635	19.0337	7.41639	11.9202	7.63773	0.0118312	2.44462	Swissprot: P35502 3e-62 ESTF_MYZPE Esterase FE4 OS=Myzus persicae PE=1 SV=1|Nr: gb|ABY53601.1| 1e-120 carboxylesterase-like protein [Locusta migratoria manilensis]|IPR: IPR002018; Carboxylesterase, type B|Cog: BS_pnbA 2e-39 --|Kegg: dpo:Dpse_GA17724 1e-58 GA17724-PA [EC:3.1.1.1]; K03927 carboxylesterase type B
MergeConsencus46587	13.1206	11.9043	12.0591	2.1902	8.48439	8.16943	0.0216455	2.4307	Swissprot: Q04519 1e-93 ASM_MOUSE Sphingomyelin phosphodiesterase OS=Mus musculus GN=Smpd1 PE=2 SV=2|Nr: gb|EEB16579.1| 1e-177 sphingomyelin phosphodiesterase, putative [Pediculus humanus corporis]|IPR: IPR004843; Metallophosphoesterase|GO: GO:0016787; hydrolase activity; Molecular Function|Kegg: dpo:Dpse_GA17413 1e-166 GA17413-PA [EC:3.1.4.12]; K01117 sphingomyelin phosphodiesterase
MergeConsencus38042	7.27198	4.92568	4.7048	4.58027	2.13414	2.23228	0.0408571	2.43054	Swissprot: Q69566 5e-26 U88_HHV6U Uncharacterized protein U88 OS=Human herpesvirus 6A (strain Uganda-1102) GN=U88 PE=4 SV=1|Nr: ref|XP_001749365.1| 5e-27 hypothetical protein [Monosiga brevicollis MX1] gb|EDQ85886.1| predicted protein [Monosiga brevicollis MX1]|Cog: PM0926 4e-12 --|Kegg: dpo:Dpse_GA10815 1e-11 GA10815-PA; K04446 nuclear factor of activated T-cells, cytoplasmic, calcineurin-depend…
Contig4673	2.18577	2.56998	3.37925	2.05947	1.36609	1.23457	0.0281082	2.42798	Swissprot: P02981 3e-65 TCR3_ECOLX Tetracycline resistance protein, class C OS=Escherichia coli GN=tetA PE=1 SV=1|Nr: ref|ZP_03797776.1| 6e-64 hypothetical protein COPCOM_00016 [Coprococcus comes ATCC 27758] gb|EEG91697.1| hypothetical protein COPCOM_00016 [Coprococcus comes ATCC 27758]|Nt: gb|FJ391469.1| 0.0 Gateway entry vector pJM1, complete sequence|Cog: DR0472 2e-11 --|Kegg: sec:SC004 3e-50 …
MergeConsencus55916	8.64248	17.8994	12.6873	6.27541	6.6007	6.98633	0.0370833	2.40132	Swissprot: Q5RA22 1e-148 5NTC_PONAB Cytosolic purine 5'-nucleotidase OS=Pongo abelii GN=NT5C2 PE=2 SV=1|Nr: ref|XP_624160.1| 0.0 PREDICTED: similar to CG32549-PD, isoform D isoform 1 [Apis mellifera]|IPR: IPR008380; HAD-superfamily hydrolase, subfamily IG, 5'-nucleotidase|Kegg: mcc:714292 1e-148 NT5C2; 5'-nucleotidase, cytosolic II [EC:3.1.3.5]; K01081 5'-nucleotidase
MergeConsencus15065	73.95	72.1838	36.3395	27.0011	25.96	30.6748	0.0278841	2.39266	Swissprot: P29981 1e-118 CP4C1_BLADI Cytochrome P450 4C1 OS=Blaberus discoidalis GN=CYP4C1 PE=2 SV=1|Nr: pir||JC8026 1e-117 cytochrome P450 enzyme, CYP4C39 enzyme - green crab, common shore crab gb|AAQ93010.1| cytochrome P450 CYP4C39 [Carcinus maenas]|IPR: IPR001128; Cytochrome P450
MergeConsencus9292	8.34996	8.51378	11.4973	5.90061	5.35728	4.86364	0.00932623	2.39207	Swissprot: O88653 6e-35 MK1I1_MOUSE Mitogen-activated protein kinase kinase 1-interacting protein 1 OS=Mus musculus GN=Map2k1ip1 PE=1 SV=1|Nr: ref|XP_001121654.1| 2e-40 PREDICTED: similar to mitogen-activated protein kinase kinase 1 interacting protein 1 [Apis mellifera]|Kegg: mmu:56692 1e-34 Map2k1ip1; mitogen-activated protein kinase kinase 1 interacting protein 1; K04370 mitogen-activated prot…
MergeConsencus11141	19.2373	24.015	24.968	15.4404	11.756	9.92667	0.0062507	2.39043	Swissprot: Q969L4 1e-12 LSM10_HUMAN U7 snRNA-associated Sm-like protein LSm10 OS=Homo sapiens GN=LSM10 PE=1 SV=1|Nr: ref|XP_001121717.1| 6e-16 PREDICTED: similar to LSM10, U7 small nuclear RNA associated [Apis mellifera]|IPR: IPR001163; Like-Sm ribonucleoprotein, core
MergeConsencus14344	3.38532	4.64379	3.27112	1.69453	0.872767	2.86817	0.0273639	2.3864	Swissprot: Q5H8C4 1e-136 VP13A_MOUSE Vacuolar protein sorting-associated protein 13A OS=Mus musculus GN=Vps13a PE=1 SV=1|Nr: ref|XP_973982.1| 0.0 PREDICTED: similar to vacuolar protein sorting-associated protein (vps13), partial [Tribolium castaneum]|Cog: SPBC31F10.18c 8e-53 --|Kegg: rha:RHA1_ro06644 1e-07 infB; translation initiation factor IF-2 [EC:3.6.5.3]; K02519 translation initiation factor…
MergeConsencus14899	295.362	407.764	509.461	290.01	228.067	183.982	0.0346844	2.37513	Nr: ref|YP_001381174.1| 8e-08 LigA [Anaeromyxobacter sp. Fw109-5] gb|ABS28190.1| LigA [Anaeromyxobacter sp. Fw109-5]
MergeConsencus28938	1.99317	2.34353	2.27057	1.03784	1.18015	1.06654	0.00032748	2.36178	Swissprot: O54981 3e-85 STIP1_CRIGR Stress-induced-phosphoprotein 1 OS=Cricetulus griseus GN=STIP1 PE=2 SV=1|Nr: ref|XP_001603429.1| 1e-123 PREDICTED: similar to Hsc70/Hsp90-organizing protein HOP [Nasonia vitripennis]|IPR: IPR001440; Tetratricopeptide TPR-1
MergeConsencus34082	6.18933	10.0408	10.7801	4.3184	5.11201	5.22169	0.0234721	2.3578	Swissprot: A8Y1P7 3e-66 BRE4_CAEBR Beta-1,4-N-acetylgalactosaminyltransferase bre-4 OS=Caenorhabditis briggsae GN=bre-4 PE=3 SV=1|Nr: ref|XP_394839.2| 1e-85 PREDICTED: similar to 4GalNAcTA CG8536-PA, partial [Apis mellifera]|IPR: IPR001998; Xylose isomerase
MergeConsencus5910	2.30789	4.19368	3.32477	2.07569	1.88825	1.30355	0.0311583	2.35527	Swissprot: Q4V8I4 1e-104 DEFI8_RAT Differentially expressed in FDCP 8 homolog OS=Rattus norvegicus GN=Def8 PE=2 SV=1|Nr: ref|XP_969464.1| 1e-122 PREDICTED: similar to CG11534 CG11534-PA [Tribolium castaneum]|IPR: IPR002219; Protein kinase C, phorbol ester/diacylglycerol binding|GO: GO:0007242; intracellular signaling cascade; Biological Process|Kegg: cel:C09E10.2 2e-06 dgk-1; DiacylGlycerol Kinas…
MergeConsencus13659	1.51646	2.28449	1.28214	0.937671	0.852996	0.695931	0.02481	2.35477	Nr: ref|XP_001606081.1| 5e-43 PREDICTED: similar to ENSANGP00000006233 [Nasonia vitripennis]|IPR: IPR000488; Death
MergeConsencus6249	1.93715	1.99295	2.05897	1.54002	0.408611	1.23091	0.0254548	2.35397	Swissprot: Q9VGH1 2e-77 CP315_DROME Cytochrome P450 315a1, mitochondrial OS=Drosophila melanogaster GN=sad PE=2 SV=1|Nr: ref|XP_970122.2| 1e-100 PREDICTED: similar to Cytochrome P450 315a1, mitochondrial precursor (CYPCCCXVA1) (Protein shadow) [Tribolium castaneum]|IPR: IPR001128; Cytochrome P450|GO: GO:0004497; monooxygenase activity; Molecular Function
MergeConsencus18553	124.92	212.986	206.405	109.515	113.393	81.7595	0.0281751	2.34805	Nr: ref|XP_001952146.1| 6e-58 PREDICTED: hypothetical protein [Acyrthosiphon pisum]|Cog: alr2738 3e-09 --|Kegg: ana:alr2738 3e-08 putative phosphonate transport system substrate-bidning protein; K02044 phosphonate transport system substrate-binding protein
MergeConsencus39758	1.80086	1.94096	1.94892	0.975662	1.21557	0.983264	0.000405752	2.34456	Swissprot: Q6PB44 0.0 PTN23_MOUSE Tyrosine-protein phosphatase non-receptor type 23 OS=Mus musculus GN=Ptpn23 PE=1 SV=2|Nr: ref|XP_623844.2| 0.0 PREDICTED: similar to CG9311-PA [Apis mellifera]|Cog: SPAC11E3.09 1e-16 --|Kegg: dpo:Dpse_GA21690 0.0 GA21690-PA [EC:3.1.3.48]; K01104 protein-tyrosine phosphatase
MergeConsencus40328	3.77601	7.66866	7.69528	3.88126	3.08942	3.10222	0.0425933	2.34293	Swissprot: Q8MZR6 6e-33 HYEP1_CTEFE Juvenile hormone epoxide hydrolase 1 OS=Ctenocephalides felis GN=EH1 PE=1 SV=3|Nr: ref|XP_394922.2| 2e-32 PREDICTED: similar to Juvenile hormone epoxide hydrolase 1 CG15101-PA [Apis mellifera]|Cog: CAC0719 2e-16 --|Kegg: xla:432100 2e-31 MGC82277; hypothetical protein MGC82277 [EC:3.3.2.9]; K01253 microsomal epoxide hydrolase
MergeConsencus9698	6.788	10.8004	7.25732	4.29567	3.8372	4.46349	0.0166197	2.34246	Swissprot: A6H751 3e-94 FOLC_BOVIN Folylpolyglutamate synthase, mitochondrial OS=Bos taurus GN=FPGS PE=2 SV=1|Nr: sp|A6H751|FOLC_BOVIN 5e-93 RecName: Full=Folylpolyglutamate synthase, mitochondrial; AltName: Full=Folylpoly-gamma-glutamate synthetase; Short=FPGS; AltName: Full=Tetrahydrofolate synthase; AltName: Full=Tetrahydrofolylpolyglutamate synthase; Flags: Precursor gb|AAI46115.1| FPGS prote…
MergeConsencus241	1.66733	2.94061	1.80441	0.235648	1.12543	1.31845	0.0381203	2.33912	Nr: gb|ABU88425.1| 7e-09 carboxylesterase-like protein [Helicoverpa armigera]
MergeConsencus42592	9.93824	9.67047	10.0665	5.81212	4.81912	5.41978	6.4315e-05	2.33603	Swissprot: Q802G7 1e-11 SELM_DANRE Selenoprotein M OS=Danio rerio GN=sepm PE=2 SV=2|Nr: gb|ABI93178.1| 2e-16 selenoprotein M [Litopenaeus vannamei]
MergeConsencus47273	3.4209	2.36601	2.33329	1.70642	1.35828	0.909273	0.0156869	2.33391	Swissprot: Q5R5N6 1e-67 BGLR_PONAB Beta-glucuronidase OS=Pongo abelii GN=GUSB PE=2 SV=2|Nr: ref|XP_969279.1| 1e-104 PREDICTED: similar to CG15117 CG15117-PA [Tribolium castaneum]|IPR: IPR006103; Glycoside hydrolase family 2, TIM barrel
Contig470	7.67128	7.89226	4.20041	3.61401	2.15752	3.61077	0.0275463	2.3338	Swissprot: Q9VJ33 1e-34 NEDD8_DROME NEDD8 OS=Drosophila melanogaster GN=Nedd8 PE=1 SV=1|Nr: gb|EEB16877.1| 6e-35 NEDD8 precursor, putative [Pediculus humanus corporis]|Nt: ref|XM_001944989.1| 2e-23 PREDICTED: Acyrthosiphon pisum similar to AGAP007913-PA (LOC100167711), mRNA|Cog: SPBC12D12.08c 2e-29 --|Kegg: tva:TVAG_019240 3e-22 polyubiquitin, putative; K02927 large subunit ribosomal protein L40e
MergeConsencus11870	20.7142	36.3538	30.9649	18.0822	16.4493	12.7322	0.0243899	2.32329	Swissprot: P07735 8e-09 GPDA_DROVI Glycerol-3-phosphate dehydrogenase [NAD+], cytoplasmic OS=Drosophila virilis GN=Gpdh PE=1 SV=3|Nr: gb|AAD05300.1| 9e-19 sn-glycerol-3-phosphate dehydrogenase isoform 4 [Locusta migratoria]|Kegg: cel:K11H3.1 2e-08 gpdh-2; Glycerol-3-Phosphate DeHydrogenase [EC:1.1.1.8]; K00006 glycerol-3-phosphate dehydrogenase (NAD+)
MergeConsencus1846	9.96634	7.48797	11.6041	5.90313	7.58321	3.69053	0.0368034	2.32258	Swissprot: Q6PFT6 3e-10 TMM47_DANRE Transmembrane protein 47 OS=Danio rerio GN=tmem47 PE=2 SV=1|Nr: gb|EEB11069.1| 7e-95 transmembrane protein, putative [Pediculus humanus corporis]|IPR: IPR004031; PMP-22/EMP/MP20/Claudin
MergeConsencus8933	7.75094	6.15769	9.23025	3.25678	4.71335	5.20617	0.0176842	2.29137	Swissprot: P05552 7e-06 ADF1_DROME Transcription factor Adf-1 OS=Drosophila melanogaster GN=Adf1 PE=1 SV=2|Nr: ref|XP_001944667.1| 2e-19 PREDICTED: similar to CG13204 CG13204-PA [Acyrthosiphon pisum]|IPR: IPR006578; MADF
MergeConsencus45892	5.40815	4.98105	3.55348	2.29304	1.92663	2.85101	0.0105675	2.29042	Swissprot: Q6GMK0 1e-134 MGT4B_DANRE Alpha-1,3-mannosyl-glycoprotein 4-beta-N-acetylglucosaminyltransferase B OS=Danio rerio GN=mgat4b PE=2 SV=1|Nr: ref|XP_966452.2| 1e-179 PREDICTED: similar to n-acetylglucosaminyltransferase vi [Tribolium castaneum]|IPR: IPR006759; Glycosyl transferase, family 54|GO: GO:0005975; carbohydrate metabolic process; Biological Process
MergeConsencus7823	8.48911	10.7798	12.0744	8.39851	6.11208	4.21946	0.0291368	2.28487	Swissprot: Q8IUQ0 3e-42 RLBL1_HUMAN Retinaldehyde-binding protein 1-like protein 1 OS=Homo sapiens GN=RLBP1L1 PE=2 SV=1|Nr: ref|XP_968820.1| 1e-96 PREDICTED: similar to alpha-tocopherol transfer protein [Tribolium castaneum]|IPR: IPR001071; Cellular retinaldehyde binding/alpha-tocopherol transport
MergeConsencus15460	144.418	181.528	261.283	137.045	113.341	108.178	0.0494977	2.28	Swissprot: Q7Z4W1 3e-79 DCXR_HUMAN L-xylulose reductase OS=Homo sapiens GN=DCXR PE=1 SV=2|Nr: ref|NP_001017619.1| 1e-89 dicarbonyl/L-xylulose reductase [Danio rerio] gb|AAH93141.1| Dicarbonyl/L-xylulose reductase [Danio rerio]|IPR: IPR002198; Short-chain dehydrogenase/reductase SDR
MergeConsencus8012	7.80827	7.73119	10.9599	5.80822	4.39209	4.87453	0.0144882	2.27981	Swissprot: Q1BA94 2e-08 IF2_MYCSS Translation initiation factor IF-2 OS=Mycobacterium sp. (strain MCS) GN=infB PE=3 SV=1|Nr: ref|XP_392555.1| 3e-77 PREDICTED: similar to Karl CG4139-PA, isoform A [Apis mellifera]|IPR: IPR011038; Calycin-like|Cog: DR2133 8e-06 --|Kegg: mmc:Mmcs_2082 4e-08 infB; translation initiation factor IF-2; K02519 translation initiation factor IF-2
MergeConsencus25258	19.3962	24.8789	29.5326	15.368	14.9602	12.7813	0.0140366	2.27926	Swissprot: Q8TGM7 6e-20 ART2_YEAST Uncharacterized protein ART2 OS=Saccharomyces cerevisiae GN=ART2 PE=2 SV=1|Nr: gb|EED14557.1| 1e-125 hypothetical protein TSTA_040370 [Talaromyces stipitatus ATCC 10500]
MergeConsencus16354	2.49343	2.68043	2.97378	1.5103	1.28232	1.60954	0.000916699	2.2748	Swissprot: Q6DHK1 1e-61 AIBP_DANRE Apolipoprotein A-I-binding protein OS=Danio rerio GN=apoa1bp PE=2 SV=1|Nr: ref|XP_970501.2| 2e-62 PREDICTED: similar to CG2974 CG2974-PA [Tribolium castaneum]|IPR: IPR004443; YjeF-related protein, N-terminal|Cog: SPAC15A10.05c 3e-38 --
MergeConsencus5291	17.637	32.1092	19.2043	12.5974	9.81401	12.4255	0.0358555	2.27291	Swissprot: O46162 6e-17 SGP1_SCHGR Serine protease inhibitor I/II OS=Schistocerca gregaria PE=1 SV=1|Nr: sp|O46162|SGP1_SCHGR 8e-16 RecName: Full=Serine protease inhibitor I/II; Contains: RecName: Full=Protease inhibitor SGPI-1; AltName: Full=Schistocerca gregaria trypsin inhibitor; Short=SGTI; Contains: RecName: Full=Protease inhibitor SGPI-2; AltName: Full=Schistocerca gregaria chymotrypsin inh…
Contig1592	18.4747	12.0678	13.4877	12.3301	6.92791	6.95662	0.0440837	2.26344	Swissprot: P12978 1e-14 EBNA2_EBV Epstein-Barr nuclear antigen 2 OS=Epstein-Barr virus (strain B95-8) GN=EBNA2 PE=1 SV=1|Nr: ref|XP_002242214.1| 3e-14 hypothetical protein BRAFLDRAFT_104497 [Branchiostoma floridae] gb|EEA38295.1| hypothetical protein BRAFLDRAFT_104497 [Branchiostoma floridae]|Cog: CC3494_1 6e-12 --|Kegg: ava:Ava_1781 2e-11 hypothetical protein [EC:3.4.21.10]; K01317 acrosin
MergeConsencus16552	63.9269	74.852	68.6906	39.7388	40.8822	36.5569	0.00045826	2.26133	Swissprot: Q99497 1e-58 PARK7_HUMAN Protein DJ-1 OS=Homo sapiens GN=PARK7 PE=1 SV=2|Nr: gb|EEB14962.1| 7e-65 protein DJ-1, putative [Pediculus humanus corporis]|IPR: IPR002818; ThiJ/PfpI|Cog: YPO3172 5e-29 --|Kegg: hsa:11315 2e-58 PARK7; Parkinson disease (autosomal recessive, early onset) 7; K05687 protein DJ-1
MergeConsencus8324	34.9761	45.7923	33.5648	27.3438	17.5115	17.6552	0.0133829	2.25971	Swissprot: Q9BUQ8 0.0 DDX23_HUMAN Probable ATP-dependent RNA helicase DDX23 OS=Homo sapiens GN=DDX23 PE=1 SV=3|Nr: ref|XP_001602070.1| 0.0 PREDICTED: similar to DEAD box ATP-dependent RNA helicase [Nasonia vitripennis]|IPR: IPR000629; RNA helicase, ATP-dependent, DEAD-box, conserved site
MergeConsencus3254	4.83595	4.68259	3.02358	1.90972	2.72019	1.60674	0.0173713	2.25285	Nr: gb|EEB19021.1| 5e-08 hypothetical protein Phum_PHUM546520 [Pediculus humanus corporis]
MergeConsencus2618	8.64464	11.1978	15.4035	7.66194	6.92295	7.11715	0.0425403	2.24802	Swissprot: Q07116 3e-31 SUOX_RAT Sulfite oxidase, mitochondrial OS=Rattus norvegicus GN=Suox PE=1 SV=2|Nr: gb|EEB13412.1| 2e-33 predicted protein [Pediculus humanus corporis]|IPR: IPR000572; Oxidoreductase, molybdopterin binding|GO: GO:0006118; electron transport; Biological Process|Cog: MT1801 3e-19 --|Kegg: rno:81805 6e-31 Suox; sulfite oxidase [EC:1.8.3.1]; K00387 sulfite oxidase
Contig3825	330.831	375.939	358.265	195.297	249.633	157.237	0.00332844	2.23502	Nr: gb|EEB19804.1| 1e-13 hypothetical protein Phum_PHUM590900 [Pediculus humanus corporis]|Nt: gb|AY859546.1| 0.0 Gomphocerinae sp. JM-2004 internal transcribed spacer 1, partial sequence; 5.8S ribosomal RNA gene and internal transcribed spacer 2, complete sequence; and 28S ribosomal RNA gene, partial sequence
MergeConsencus42139	6.82395	3.87339	5.27499	3.65824	2.64719	2.65816	0.0316055	2.23248	Nr: gb|ABV31711.1| 7e-06 transposase [Salmo salar]
Contig5032	3271.62	3237.9	4215.94	1900.92	2456.37	2030.5	0.00808888	2.22707	Cog: DR2133 6e-06 --
MergeConsencus4264	17.6863	21.1305	28.0049	13.3046	12.8366	14.5011	0.0234473	2.22249	Swissprot: Q53S33 3e-20 BOLA3_HUMAN BolA-like protein 3 OS=Homo sapiens GN=BOLA3 PE=2 SV=1|Nr: ref|XP_001123015.1| 1e-27 PREDICTED: similar to bolA-like 3 isoform 1 [Apis mellifera]|Cog: SPCC4B3.11c 5e-13 --|Kegg: pic:PICST_51204 2e-08 hypothetical protein; K05527 BolA protein
MergeConsencus5793	3.68575	5.96576	6.54929	3.51788	3.28482	2.81178	0.0354207	2.22173	Swissprot: Q5FWL3 1e-125 RNF41_XENLA E3 ubiquitin-protein ligase NRDP1 OS=Xenopus laevis GN=rnf41 PE=2 SV=1|Nr: ref|XP_972869.1| 1e-160 PREDICTED: similar to conserved hypothetical protein [Tribolium castaneum]|IPR: IPR001841; Zinc finger, RING-type
Contig5260	26.6857	22.2048	21.4217	9.86406	16.627	11.8263	0.00734911	2.21628	Nt: gb|AC112263.4| 1e-06 Mus musculus BAC clone RP23-403P24 from 5, complete sequence
MergeConsencus12742	4.36602	7.7002	5.37888	3.0853	1.99538	4.31555	0.0438697	2.20395	Nr: ref|XP_002088072.1| 1e-12 GE18376 [Drosophila yakuba] gb|EDW87784.1| GE18376 [Drosophila yakuba]
MergeConsencus17779	1.91882	3.76018	2.71933	1.50662	1.67895	1.32464	0.0376758	2.20388	Nr: dbj|BAD11135.1| 1e-07 putative transposase yabusame-1 [Bombyx mori]
MergeConsencus46578	70.4744	92.1076	59.3402	21.671	53.7397	39.8611	0.0282255	2.19479	Swissprot: Q9Y4X1 7e-53 UD2A1_HUMAN UDP-glucuronosyltransferase 2A1 OS=Homo sapiens GN=UGT2A1 PE=1 SV=1|Nr: gb|EEB14627.1| 5e-84 UDP-glucuronosyltransferase 1-8 precursor, putative [Pediculus humanus corporis]|IPR: IPR001865; Ribosomal protein S2
MergeConsencus37613	1.45151	1.58475	1.44261	0.732662	0.816462	0.936966	0.000449303	2.19242	Swissprot: Q24206 2e-34 BRC4_DROME Broad-complex core protein isoform 6 OS=Drosophila melanogaster GN=br PE=1 SV=2|Nr: ref|XP_395624.3| 4e-65 PREDICTED: similar to Broad-complex core-protein isoform 6 [Apis mellifera]|IPR: IPR000210; BTB/POZ-like
MergeConsencus8627	3.91686	4.12563	3.78472	3.45987	2.1114	1.38271	0.0289443	2.1918	Nr: gb|AAL57609.1|AF456125_1 7e-07 reverse transcriptase [Drosophila melanogaster]
MergeConsencus9900	9.46458	9.89176	7.76784	5.11941	5.25803	4.48784	0.00204237	2.19138	Swissprot: Q9WU78 1e-54 PDC6I_MOUSE Programmed cell death 6-interacting protein OS=Mus musculus GN=Pdcd6ip PE=1 SV=2|Nr: ref|XP_973055.2| 4e-73 PREDICTED: similar to programmed cell death 6-interacting protein [Tribolium castaneum]|Cog: Rv3876 6e-08 --|Kegg: gga:419435 8e-12 RERE; arginine-glutamic acid dipeptide (RE) repeats; K05628 arginine-glutamic acid dipeptide (RE) repeats
MergeConsencus6270	152.004	111.739	124.232	64.6956	101.034	58.1738	0.0188243	2.19073	Swissprot: O18598 5e-70 GST1_BLAGE Glutathione S-transferase OS=Blattella germanica PE=1 SV=3|Nr: gb|EEB14151.1| 6e-70 glutathione S-transferase, putative [Pediculus humanus corporis]|IPR: IPR004045; Glutathione S-transferase, N-terminal
MergeConsencus2421	2.09161	2.97399	2.14325	1.64993	1.14915	1.15391	0.0152215	2.19003	Swissprot: P48506 0.0 GSH1_HUMAN Glutamate--cysteine ligase catalytic subunit OS=Homo sapiens GN=GCLC PE=1 SV=2|Nr: ref|XP_966349.1| 0.0 PREDICTED: similar to glutamate cysteine ligase isoform 1 [Tribolium castaneum]|IPR: IPR004308; Glutamate-cysteine ligase catalytic subunit|GO: GO:0004357; glutamate-cysteine ligase activity; Molecular Function
MergeConsencus3288	2.70935	3.90959	2.33235	1.39243	1.93962	1.25207	0.0243835	2.18057	Nr: ref|XP_397472.2| 3e-20 PREDICTED: similar to CG31919-PB, isoform B [Apis mellifera]
MergeConsencus7546	135.901	230.047	128.25	91.1782	82.3921	83.4802	0.0369173	2.18019	Swissprot: Q9H3G5 1e-139 CPVL_HUMAN Probable serine carboxypeptidase CPVL OS=Homo sapiens GN=CPVL PE=1 SV=2|Nr: ref|XP_969249.1| 1e-162 PREDICTED: similar to salivary/fat body serine carboxypeptidase [Tribolium castaneum]|IPR: IPR001563; Peptidase S10, serine carboxypeptidase|GO: GO:0004185; serine carboxypeptidase activity; Molecular Function
MergeConsencus5987	5.62473	8.68012	5.2991	3.97479	3.36161	2.77985	0.0244843	2.17878	Swissprot: Q8WUF8 6e-74 F172A_HUMAN UPF0528 protein FAM172A OS=Homo sapiens GN=FAM172A PE=2 SV=1|Nr: gb|EEC11656.1| 1e-80 conserved hypothetical protein [Ixodes scapularis]
MergeConsencus18242	25.8943	37.5914	45.1394	26.1408	20.8076	20.2969	0.039819	2.17234	Nr: ref|XP_001361203.1| 7e-23 GA13019 [Drosophila pseudoobscura pseudoobscura] ref|XP_002018402.1| GL17688 [Drosophila persimilis] gb|EAL25781.1| GA13019 [Drosophila pseudoobscura pseudoobscura] gb|EDW36241.1| GL17688 [Drosophila persimilis]
MergeConsencus17248	1.41037	2.11055	1.09024	0.724843	0.865446	0.579355	0.0298598	2.16994	Swissprot: Q6NSW5 2e-88 FA45B_HUMAN Protein FAM45B OS=Homo sapiens GN=FAM45B PE=2 SV=1|Nr: ref|XP_001120151.1| 1e-128 PREDICTED: similar to Protein FAM45B [Apis mellifera]
MergeConsencus8230	19.7995	33.2569	35.0985	19.5672	17.5849	18.4986	0.0447458	2.16753	Swissprot: Q86AH4 2e-18 Y8592_DICDI Putative uncharacterized protein DDB_0168592 OS=Dictyostelium discoideum GN=DDB_0168592 PE=4 SV=1|Nr: ref|XP_001747019.1| 1e-19 hypothetical protein [Monosiga brevicollis MX1] gb|EDQ87943.1| predicted protein [Monosiga brevicollis MX1]|Kegg: pfa:PFL0625c 9e-13 eukaryotic translation initiation factor 3 subunit 10, putative; K03254 translation initiation factor …
MergeConsencus7706	11.4945	13.8615	19.1377	10.8303	6.9629	8.9894	0.039573	2.166	Swissprot: P62744 6e-76 AP2S1_RAT AP-2 complex subunit sigma-1 OS=Rattus norvegicus GN=Ap2s1 PE=2 SV=1|Nr: ref|XP_975476.1| 2e-77 PREDICTED: similar to clathrin coat assembly protein ap17 [Tribolium castaneum]|IPR: IPR000804; Clathrin adaptor, sigma subunit/coatomer, zeta subunit
MergeConsencus33173	1.20146	2.42168	1.99016	1.21289	1.15853	0.775556	0.0491326	2.16559	Swissprot: Q9TRY0 8e-84 FKBP4_BOVIN FK506-binding protein 4 OS=Bos taurus GN=FKBP4 PE=1 SV=4|Nr: ref|XP_395748.2| 1e-116 PREDICTED: similar to FK506-binding protein FKBP59 CG4535-PA [Apis mellifera]|IPR: IPR001179; Peptidyl-prolyl cis-trans isomerase, FKBP-type
MergeConsencus14494	9.87198	13.8086	13.5519	7.21672	9.76547	5.19138	0.0260826	2.15291	Swissprot: Q9GZQ3 6e-13 COMD5_HUMAN COMM domain-containing protein 5 OS=Homo sapiens GN=COMMD5 PE=1 SV=1|Nr: ref|XP_520030.2| 2e-12 PREDICTED: hypothetical protein isoform 4 [Pan troglodytes] ref|XP_001160190.1| PREDICTED: hypothetical protein isoform 1 [Pan troglodytes] ref|XP_001160239.1| PREDICTED: hypothetical protein isoform 2 [Pan troglodytes] ref|XP_001160283.1| PREDICTED: hypothetical pro…
Contig1224	19.9095	16.2487	25.5297	15.2279	11.3307	13.2298	0.033513	2.14658	Nt: gb|AC215790.4| 8e-08 MACACA MULATTA BAC clone CH250-101F19 from chromosome unknown, complete sequence
MergeConsencus53525	3.10939	2.28497	2.25337	1.64797	1.53038	1.31719	0.0119626	2.14362	Swissprot: P92204 1e-63 NELFE_DROME Negative elongation factor E OS=Drosophila melanogaster GN=Nelf-E PE=1 SV=1|Nr: gb|EEB20436.1| 2e-87 Negative elongation factor E, putative [Pediculus humanus corporis]|IPR: IPR000504; RNA recognition motif, RNP-1|GO: GO:0003676; nucleic acid binding; Molecular Function
MergeConsencus14590	4.8682	4.83353	4.5158	3.51662	2.79918	1.95532	0.00650947	2.14345	Swissprot: B0RDY9 6e-07 IF2_CLAMS Translation initiation factor IF-2 OS=Clavibacter michiganensis subsp. sepedonicus (strain ATCC 33113 / JCM 9667) GN=infB PE=3 SV=1|Nr: ref|XP_624348.2| 2e-29 PREDICTED: similar to CG12114-PA [Apis mellifera]|Kegg: ptr:450139 2e-06 HSPA2; heat shock 70kDa protein 2; K03283 heat shock 70kDa protein 1/8
MergeConsencus11827	11.4444	11.0295	14.5994	9.36892	5.13583	8.5481	0.02647	2.13141	IPR: IPR001412; Aminoacyl-tRNA synthetase, class I, conserved site|GO: GO:0000166; nucleotide binding; Molecular Function
MergeConsencus15904	4.67364	3.03987	2.76723	2.24864	1.67801	2.02196	0.0354215	2.13104	IPR: IPR001138; Fungal transcriptional regulatory protein, N-terminal|GO: GO:0003700; transcription factor activity; Molecular Function
MergeConsencus11541	16.8494	19.8112	13.7396	10.4548	8.55302	9.51695	0.00827139	2.12969	Swissprot: Q9UFW8 7e-09 CGBP1_HUMAN CGG triplet repeat-binding protein 1 OS=Homo sapiens GN=CGGBP1 PE=1 SV=2|Nr: ref|XP_001947861.1| 4e-42 PREDICTED: similar to p20-CGGBP [Acyrthosiphon pisum]
MergeConsencus6720	78.0423	66.6967	37.2307	29.8753	40.4365	24.1811	0.0446828	2.12701	Swissprot: Q95215 7e-09 BGH3_RABIT Transforming growth factor-beta-induced protein ig-h3 OS=Oryctolagus cuniculus GN=TGFBI PE=2 SV=2|Nr: ref|XP_969478.1| 1e-177 PREDICTED: similar to CG5758 CG5758-PA [Tribolium castaneum]|IPR: IPR000782; Beta-Ig-H3/fasciclin|Cog: MA1996 8e-08 --|Kegg: bpm:BURPS1710b_A2207 6e-08 sensor kinase protein [EC:2.7.3.-]; K00936
MergeConsencus55295	2.03692	3.04814	1.57456	1.30856	0.833276	1.25509	0.0387248	2.11907	Swissprot: Q9V4U9 2e-34 C6A13_DROME Probable cytochrome P450 6a13 OS=Drosophila melanogaster GN=Cyp6a13 PE=1 SV=1|Nr: ref|XP_967146.1| 1e-36 PREDICTED: similar to cytochrome P450 [Tribolium castaneum]|IPR: IPR001128; Cytochrome P450
MergeConsencus15659	9035.91	7481.52	7866.76	3793.13	5700.56	4797.49	0.00480542	2.11838	Swissprot: P28799 2e-21 GRN_HUMAN Granulins OS=Homo sapiens GN=GRN PE=1 SV=2|Nr: ref|XP_002110228.1| 1e-22 expressed hypothetical protein [Trichoplax adhaerens] gb|EDV26232.1| expressed hypothetical protein [Trichoplax adhaerens]
MergeConsencus6452	162.843	206.524	268.807	158.361	119.17	131.879	0.0404837	2.11676	Nr: ref|XP_001194729.1| 5e-13 PREDICTED: hypothetical protein, partial [Strongylocentrotus purpuratus]|IPR: IPR010916; TonB box, conserved site
MergeConsencus8962	7.13769	8.57679	3.81982	3.32568	3.44134	3.01258	0.0415105	2.11376	Swissprot: Q9UQ35 3e-09 SRRM2_HUMAN Serine/arginine repetitive matrix protein 2 OS=Homo sapiens GN=SRRM2 PE=1 SV=2|Nr: ref|YP_463458.1| 5e-25 LigA [Anaeromyxobacter dehalogenans 2CP-C] gb|ABC80021.1| LigA [Anaeromyxobacter dehalogenans 2CP-C]|Cog: CC3441 8e-08 --|Kegg: bpm:BURPS1710b_1520 9e-15 recB; exodeoxyribonuclease V, beta subunit [EC:3.1.11.5]; K03582 exodeoxyribonuclease V beta subunit
MergeConsencus3412	573.184	563.278	347.883	274.271	289.687	246.711	0.0197501	2.1004	Swissprot: P13706 1e-149 GPDA_DROME Glycerol-3-phosphate dehydrogenase [NAD+], cytoplasmic OS=Drosophila melanogaster GN=Gpdh PE=1 SV=3|Nr: gb|AAD05301.1| 0.0 sn-glycerol-3-phosphate dehydrogenase isoform 3a [Locusta migratoria] gb|AAD05302.1| sn-glycerol-3-phosphate dehydrogenase isoform 3b [Locusta migratoria]|IPR: IPR006109; NAD-dependent glycerol-3-phosphate dehydrogenase, C-terminal
MergeConsencus515	7.36257	8.50749	7.26138	5.56167	4.85542	3.44156	0.00698808	2.09171	Swissprot: P33485 2e-06 VNUA_SUHVK Probable nuclear antigen OS=Suid herpesvirus 1 (strain Kaplan) PE=4 SV=1|Nr: emb|CAF89863.1| 1e-07 unnamed protein product [Tetraodon nigroviridis]|Kegg: dpo:Dpse_GA10276 2e-07 GA10276-PA; K07232 cation transport protein ChaC
MergeConsencus28666	5.35249	7.47904	8.15514	4.05649	5.58513	3.15465	0.0342665	2.089	Nr: gb|EEB17511.1| 1e-07 ubiquitin-conjugating enzyme 7-interacting protein, putative [Pediculus humanus corporis]
MergeConsencus18837	1291.22	1477.43	1279.36	710.876	1029.88	645.052	0.00740776	2.08639	Swissprot: Q9NY64 1e-13 GTR8_HUMAN Solute carrier family 2, facilitated glucose transporter member 8 OS=Homo sapiens GN=SLC2A8 PE=2 SV=3|Nr: gb|AAT72921.1| 9e-42 gastric caeca sugar transporter [Locusta migratoria]|Kegg: spu:582285 5e-15 LOC582285; similar to solute carrier family 2, (facilitated glucose transporter) member 8; K08145 MFS transporter, SP family, solute carrier family 2, (facilitat…
Contig2745	10213.1	7168.86	6102.88	5721.86	4860.21	3142.55	0.0438358	2.07942	Swissprot: Q96AC6 3e-06 KIFC2_HUMAN Kinesin-like protein KIFC2 OS=Homo sapiens GN=KIFC2 PE=2 SV=1|Nr: gb|ACF87718.1| 6e-07 unknown [Zea mays]|Kegg: hsa:90990 6e-06 KIFC2; kinesin family member C2; K10406 kinesin family member C2/C3
MergeConsencus21383	7.37645	6.5634	9.40072	3.94472	6.16773	4.50421	0.0269592	2.07727	Swissprot: Q9Z302 2e-36 OXDA_CRIGR D-amino-acid oxidase OS=Cricetulus griseus GN=DAO PE=2 SV=1|Nr: ref|XP_001848808.1| 2e-46 d-amino acid oxidase [Culex quinquefasciatus] gb|EDS29059.1| d-amino acid oxidase [Culex quinquefasciatus]|IPR: IPR006076; FAD dependent oxidoreductase
Contig5197	11.5394	20.3517	18.3499	10.9503	10.5708	8.93861	0.0368336	2.07389	Swissprot: Q52N47 1e-12 ITM2B_PIG Integral membrane protein 2B OS=Sus scrofa GN=ITM2B PE=2 SV=1|Nr: ref|XP_392881.3| 4e-56 PREDICTED: similar to CG3662-PA, isoform A [Apis mellifera]|Nt: emb|AL158209.23| 8e-12 Human DNA sequence from clone RP11-275N1 on chromosome 10 Contains a novel gene and a pseudogene similar to part of FLJ10581, complete sequence
Contig3537	65.0158	100.603	104.546	62.8483	49.6813	55.0837	0.0299711	2.07185	Swissprot: Q6P7Q4 1e-71 LGUL_RAT Lactoylglutathione lyase OS=Rattus norvegicus GN=Glo1 PE=1 SV=3|Nr: ref|XP_624304.1| 1e-79 PREDICTED: similar to CG1707-PA [Apis mellifera]|Nt: ref|XM_624301.2| 2e-23 PREDICTED: Apis mellifera similar to CG1707-PA (LOC551915), mRNA|Cog: XF1399 3e-41 --|Kegg: gga:421428 7e-74 GLO1; glyoxalase I [EC:4.4.1.5]; K01759 lactoylglutathione lyase
MergeConsencus7500	2.42486	3.72836	2.73957	1.31812	1.67873	2.31781	0.0357433	2.06881	Swissprot: Q04893 5e-10 YM96_YEAST Uncharacterized protein YMR317W OS=Saccharomyces cerevisiae GN=YMR317W PE=2 SV=1|Nr: ref|XP_001476002.1| 4e-11 PREDICTED: hypothetical protein [Mus musculus]|Cog: YKL028w 4e-06 --|Kegg: spu:764563 6e-11 LOC764563; similar to cell division cycle 2-like 1 (PITSLRE proteins) [EC:2.7.11.22]; K08818 cell division cycle 2-like
MergeConsencus17087	13.8494	15.2926	10.6126	8.16987	8.26434	6.53004	0.010003	2.06285	Swissprot: O02739 1e-73 SPB6_BOVIN Serpin B6 OS=Bos taurus GN=SERPINB6 PE=2 SV=1|Nr: ref|XP_973349.2| 3e-82 PREDICTED: similar to serpin 5, partial [Tribolium castaneum]|IPR: IPR000215; Protease inhibitor I4, serpin|GO: GO:0004867; serine-type endopeptidase inhibitor activity; Molecular Function|Cog: MA2246 8e-61 --|Kegg: ptr:468567 2e-61 SERPINB12; serpin peptidase inhibitor, clade B (ovalbumin)…
MergeConsencus14566	23.4675	21.5031	11.635	10.0645	10.3781	9.32419	0.0358026	2.06055	Swissprot: Q28640 5e-22 HRG_RABIT Histidine-rich glycoprotein (Fragment) OS=Oryctolagus cuniculus GN=HRG PE=1 SV=1|Nr: ref|NP_776344.1| 2e-27 histidine-rich glycoprotein [Bos taurus] dbj|BAB33091.1| histidine-rich glycoprotein [Bos taurus]|Cog: CC0303 3e-09 --|Kegg: rpb:RPB_2585 9e-09 NADH dehydrogenase subunit L [EC:1.6.5.3]; K00341 NADH dehydrogenase I chain L
MergeConsencus18665	16.431	20.8704	14.741	9.49234	10.659	9.61931	0.00819271	2.05546	Swissprot: Q8TBG4 4e-98 AT2L1_HUMAN Alanine--glyoxylate aminotransferase 2-like 1 OS=Homo sapiens GN=AGXT2L1 PE=2 SV=1|Nr: ref|XP_001364959.1| 9e-99 PREDICTED: similar to Alanine-glyoxylate aminotransferase 2-like 1 [Monodelphis domestica]|IPR: IPR005814; Aminotransferase class-III
MergeConsencus28955	2.49224	3.40735	4.25629	2.04788	1.95609	2.48799	0.0422923	2.05349	Swissprot: Q2TBQ8 6e-57 6PGL_BOVIN 6-phosphogluconolactonase OS=Bos taurus GN=PGLS PE=2 SV=1|Nr: ref|XP_001603154.1| 8e-90 PREDICTED: similar to 6-phosphogluconolactonase [Nasonia vitripennis]|Cog: SPCC16C4.10 2e-39 --|Kegg: hsa:25796 2e-56 PGLS; 6-phosphogluconolactonase [EC:3.1.1.31]; K01057 6-phosphogluconolactonase
MergeConsencus2897	7.08101	7.77065	9.24447	6.89425	4.42557	4.26616	0.0279733	2.05156	Nr: dbj|BAC22720.1| 2e-12 unnamed protein product [Wolbachia endosymbiont of Callosobruchus chinensis]
Contig5307	650.368	659.058	392.459	295.831	389.064	259.005	0.0287325	2.04789	Swissprot: P15121 1e-101 ALDR_HUMAN Aldose reductase OS=Homo sapiens GN=AKR1B1 PE=1 SV=3|Nr: ref|XP_969456.1| 1e-129 PREDICTED: similar to CG6084 CG6084-PA [Tribolium castaneum]|Nt: ref|XM_002197197.1| 1e-10 PREDICTED: Taeniopygia guttata similar to AKR1B1 (LOC100231722), mRNA|Cog: slr0942 4e-75 --|Kegg: dpo:Dpse_GA19342 1e-113 GA19342-PA [EC:1.1.1.21]; K00011 aldehyde reductase
MergeConsencus2880	3.87581	5.15897	4.74845	3.72076	2.13898	2.72611	0.0220022	2.04765	Swissprot: Q8R149 4e-65 BUD13_MOUSE BUD13 homolog OS=Mus musculus GN=Bud13 PE=1 SV=1|Nr: ref|XP_392248.3| 2e-76 PREDICTED: similar to CG13625-PA [Apis mellifera]|Cog: SPAC56F8.03 6e-10 --|Kegg: dre:324197 2e-20 wu:fc21e07; wu:fc21e07 [EC:6.3.2.19]; K10631 E3 ubiquitin-protein ligase Topors
MergeConsencus7647	2.65765	1.93002	1.87312	1.10474	1.05523	1.5011	0.0160509	2.04504	Swissprot: Q9Y115 0.0 UN93L_DROME UNC93-like protein OS=Drosophila melanogaster GN=CG4928 PE=2 SV=1|Nr: ref|XP_396585.2| 0.0 PREDICTED: similar to CG4928-PB, isoform B [Apis mellifera]|Cog: DR2133 1e-08 --|Kegg: bpm:BURPS1710b_1520 3e-20 recB; exodeoxyribonuclease V, beta subunit [EC:3.1.11.5]; K03582 exodeoxyribonuclease V beta subunit
MergeConsencus16847	9.54606	17.225	11.836	7.61412	8.82526	6.19261	0.0453636	2.0447	Nr: gb|ABI21593.1| 2e-06 hypothetical protein [uncultured organism]
MergeConsencus13655	213.786	295.257	206.447	173.852	127.468	123.538	0.0207709	2.03846	Nr: ref|XP_001846937.1| 5e-07 hypothetical protein CpipJ_CPIJ005157 [Culex quinquefasciatus] gb|EDS45133.1| hypothetical protein CpipJ_CPIJ005157 [Culex quinquefasciatus]|Cog: RSc1986 8e-06 --
MergeConsencus5489	3.20305	3.515	2.80613	1.81078	0.960903	2.89465	0.0485728	2.03661	Swissprot: O12947 6e-69 ICMT_XENLA Protein-S-isoprenylcysteine O-methyltransferase OS=Xenopus laevis GN=icmt PE=2 SV=1|Nr: ref|XP_321837.3| 3e-74 AGAP001310-PA [Anopheles gambiae str. PEST] gb|EAA01195.3| AGAP001310-PA [Anopheles gambiae str. PEST]|Cog: SPAC10F6.12c 4e-38 --|Kegg: dpo:Dpse_GA10878 4e-75 GA10878-PA [EC:2.1.1.100]; K00587 protein-S-isoprenylcysteine O-methyltransferase
MergeConsencus8197	89.3932	97.5242	52.6	42.7425	43.4035	43.7089	0.0286584	2.03548	Swissprot: P49756 2e-13 RBM25_HUMAN Probable RNA-binding protein 25 OS=Homo sapiens GN=RBM25 PE=1 SV=2|Nr: ref|XP_001676690.1| 1e-13 Hypothetical protein CBG14637 [Caenorhabditis briggsae AF16] emb|CAP33096.1| Hypothetical protein CBG14637 [Caenorhabditis briggsae]|Kegg: pfa:PFL0625c 2e-09 eukaryotic translation initiation factor 3 subunit 10, putative; K03254 translation initiation factor eIF-3 …
MergeConsencus274	9.1934	8.54169	8.00114	4.27052	4.99041	5.88258	0.00183839	2.03523	Swissprot: P25107 1e-67 PTHR1_DIDMA Parathyroid hormone/parathyroid hormone-related peptide receptor OS=Didelphis marsupialis virginiana GN=PTHR1 PE=2 SV=2|Nr: gb|EEB13319.1| 7e-72 parathyroid hormone receptor, putative [Pediculus humanus corporis]|IPR: IPR000832; GPCR, family 2, secretin-like
MergeConsencus52390	35.312	27.3648	23.7294	16.7303	17.8313	16.3187	0.0132336	2.02688	Nr: ref|XP_001179499.1| 2e-23 PREDICTED: similar to endonuclease/reverse transcriptase [Strongylocentrotus purpuratus] ref|XP_001178511.1| PREDICTED: similar to endonuclease/reverse transcriptase [Strongylocentrotus purpuratus]
MergeConsencus16698	30.2835	45.7429	32.2948	30.6164	18.1533	16.4806	0.0474558	2.02339	Swissprot: Q07G43 6e-44 CA055_XENTR Uncharacterized protein C1orf55 homolog OS=Xenopus tropicalis GN=TEgg019d03.1 PE=2 SV=1|Nr: ref|XP_396921.2| 1e-56 PREDICTED: similar to CG5986-PA [Apis mellifera]|Kegg: ani:AN3705.2 1e-09 hypothetical protein; K06948
MergeConsencus13835	4.48517	5.27357	4.53389	4.14474	2.52288	2.7282	0.0228922	2.019	Swissprot: Q4V7W8 8e-50 U516_XENLA UPF0516 protein OS=Xenopus laevis PE=2 SV=1|Nr: ref|XP_001950823.1| 4e-51 PREDICTED: similar to C37A2.6 [Acyrthosiphon pisum]|IPR: IPR010456; Ribosomal L11 methyltransferase|GO: GO:0005737; cytoplasm; Cellular Component
MergeConsencus18223	6.83866	5.89654	5.40383	3.22175	4.2741	3.26178	0.00531055	2.01852	Swissprot: Q86AH4 2e-24 Y8592_DICDI Putative uncharacterized protein DDB_0168592 OS=Dictyostelium discoideum GN=DDB_0168592 PE=4 SV=1|Nr: ref|XP_001076932.1| 2e-27 PREDICTED: hypothetical protein [Rattus norvegicus]|Cog: aq_2032 5e-06 --|Kegg: pfa:PFL0625c 3e-20 eukaryotic translation initiation factor 3 subunit 10, putative; K03254 translation initiation factor eIF-3 subunit 10
MergeConsencus15064	36.389	57.9673	55.8045	27.3738	38.296	27.1835	0.0350451	2.00816	Swissprot: Q8TGM7 4e-15 ART2_YEAST Uncharacterized protein ART2 OS=Saccharomyces cerevisiae GN=ART2 PE=2 SV=1|Nr: ref|XP_002139698.1| 6e-40 senescence-associated protein [Cryptosporidium muris RN66] ref|XP_002140053.1| senescence-associated protein [Cryptosporidium muris RN66] ref|XP_002140750.1| senescence-associated protein [Cryptosporidium muris RN66] ref|XP_002141022.1| senescence-associated …
MergeConsencus3968	2.33737	3.31293	2.62359	1.90063	1.76501	1.41063	0.0151527	2.006	Swissprot: Q99PV3 0.0 MKLN1_RAT Muskelin OS=Rattus norvegicus GN=Mkln1 PE=1 SV=1|Nr: gb|EEB15746.1| 0.0 Muskelin, putative [Pediculus humanus corporis]|IPR: IPR000421; Coagulation factor 5/8 type, C-terminal
MergeConsencus27353	4.40563	5.05266	2.28901	2.19462	1.95001	2.03967	0.0456166	2.00384	Swissprot: B1WBU8 1e-93 U639_RAT UPF0639 protein OS=Rattus norvegicus PE=2 SV=1|Nr: ref|XP_001926712.1| 6e-93 PREDICTED: similar to hCG21972 [Sus scrofa]|IPR: IPR001849; Pleckstrin-like|Cog: SPy0532 2e-10 --|Kegg: ehi:22.t00027 3e-12 villin-related protein; K08017 advillin
